# Supplementary material for: Synthesis of aryl enopyranones directly from glycals and aromatic halides to access 2-deoxy-β-C-aryl glycosides
Source: Royal Society of Chemistry journal article supplement (doi:10.1039/d4ob01172d), 2024-01-01

# **Synthesis of Aryl Enopyranones Directly Accessed From Glycals and Aromatic Halides Enroute Toward 2-Deoxy- $\beta$ -C-Aryl Glycosides**

Irshad Ahmad Zargar,<sup>a,b</sup> Bisma Rasool<sup>a,b</sup>, SK Bappa<sup>c</sup> and Debaraj Mukherjee<sup>\*b,c</sup>

[a] Natural Product and Medicinal Chemistry Division, CSIR-Indian Institute of Integrative Medicine (IIIM), Jammu, 180001, India.

[b] Academy of Scientific and Innovative Research (AcSIR), Ghaziabad 201002, India.

[c] Department of Chemistry, Bose Institute Kolkata, EN 80, Sector V, Bidhan Nagar, Kolkata-700091, WB, India.

## Table of Contents

|                                                                                                  |              |
|--------------------------------------------------------------------------------------------------|--------------|
| <b>1. General Information.....</b>                                                               | <b>3</b>     |
| <b>2. Experimental.....</b>                                                                      | <b>3-4</b>   |
| 2.1 General procedures                                                                           |              |
| 2.1.1 General procedure for the synthesis of C-1 aryl enopyranones <b>3 a-q</b> and <b>4 a-c</b> |              |
| 2.1.2 General procedure for the synthesis of $\beta$ -aryl-2-deoxy C-glycosides <b>7</b>         |              |
| 2.1.3 General procedure for selective reduction of aryl enopyranone <b>8</b>                     |              |
| 2.1.4 Table 1a: optimization                                                                     |              |
| <b>3. Characterization Data.....</b>                                                             | <b>6-18</b>  |
| 3.1 Characterization Data of C-1 aryl enopyranones                                               |              |
| 3.2 Characterization Data of application product                                                 |              |
| <b>4. NMR Spectra .....</b>                                                                      | <b>19-69</b> |

## 1. General Information

All compounds were characterized by spectroscopic data. The  $^1\text{H}$  and  $^{13}\text{C}$  NMR spectra were obtained using 400 and 500 MHz spectrometers with TMS as internal standard. Chemical shift ( $\delta$ ) is expressed in ppm, J values are given in Hz and deuterated  $\text{CDCl}_3$  was used as solvent. All the reactions were monitored by thin layer chromatography (TLC). Column chromatography was performed on silica gel (60-120 mesh). All the chemicals used in experiments were purchased from commercial source mostly from sigma Aldrich and were used without further purification.

## 2. Experimental

### 2.1. General procedures

#### 2.1.1 General procedure for the synthesis of C-1 aryl enopyranones **3 a-q** and **4 a-c**

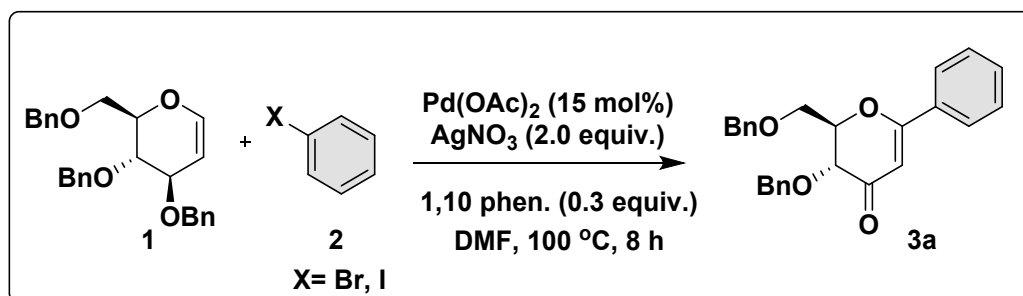

A mixture of tri-*O*-benzyl-glucal **1** (50 mg, 0.12, 1.0 equiv.), iodo benzene **2** (29.4 mg, 0.14 mmol, 1.2 equiv.),  $\text{Pd}(\text{OAc})_2$  (4.0 mg, 0.018 mmol, 15 mol %),  $\text{AgNO}_3$  (40.8 mg, 0.24 mmol, 2.0 equiv.) and 1,10 phenanthroline (32.4 mg, 0.18 mmol, 0.3 equiv.) were loaded into a Schlenk tube with magnetic bead and flashed several times with  $\text{N}_2$ . Then DMF (3mL) was added into the mixture and the resulting mixture was stirred for 8 h at 100 °C in an oil bath (oil bath temperature 100 °C). After completion of reaction, the reaction mixture was cooled to room temperature and then filtered through a small bed of celite. The filtrate was washed with ethyl acetate and water. The organic layer was dried over  $\text{MgSO}_4$ , filtered, and concentrated in vacuo. The residue left was purified by column chromatography over silica gel (60-120 mesh) using petroleum ether and hexane to acquire a pure product **3a** in 68% yield.

### 2.1.2 General procedure for the synthesis of $\beta$ -aryl-2-deoxy C-glycosides (7)

Aryl enopyranone **3d** (20 mg, 0.046 mmol, 1.0 equiv.) was stirred in 2 mL methanol at room temperature in the presence of 10% Pd/C (10 mg). The round bottom flask was flushed with H<sub>2</sub> two times and further stirred for 2 h under H<sub>2</sub>-balloon. After completion of the reaction, the reaction mixture was filtered through a small bed of celite. The filtrate was washed with ethyl acetate and water. The organic layer was dried over MgSO<sub>4</sub>, filtered, and concentrated in vacuo. The residue left was purified by column chromatography over silica gel (60-120 mesh) using petroleum ether and hexane to acquire a pure product **7** in 80% yield.

### 2.1.3 General procedure for selective reduction of aryl enopyranone (8)

Compound **8** was synthesized using **4a** (20 mg, 0.032 mmol, 1.0 equiv.) in MeOH:THF (1:1), sodium borohydride (1.5 mg, 0.038 mmol, 1.2 equiv.) and CeCl<sub>3</sub>·7H<sub>2</sub>O (18 mg, 0.048 mmol, 1.5 equiv.) were added slowly at -10 °C temperature. Stirred the reaction mixture until complete consumption of starting material was observed by TLC analysis. Then the reaction mixture was diluted with 5 mL of ethyl acetate and quenched by addition of saturated aqueous NH<sub>4</sub>Cl solution (1 mL). The organic layer was dried over anhydrous Na<sub>2</sub>SO<sub>4</sub>, filtered, and evaporated in vacuo. The residue left was purified by column chromatography over silica gel (60-120 mesh) using pet ether/ethyl acetate (90:10) as eluent to obtain compound **8** as white gummy liquid (18.0 mg, 90%).

Table 1a: Optimization

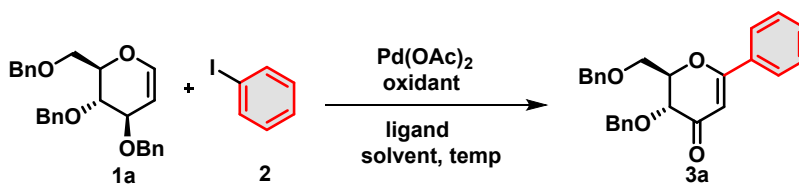

| entry | Ligand                    | Oxidant                                                              | solvent | Temp   | Yield <sup>b</sup> |
|-------|---------------------------|----------------------------------------------------------------------|---------|--------|--------------------|
| 1.    | 1,10-Phen<br>(0.1 equiv.) | $\text{AgNO}_3$<br>(1.0 equiv.)                                      | DMF     | 100 °C | 30                 |
| 2.    | 1,10-Phen<br>(0.2 equiv.) | $\text{AgNO}_3$<br>(1.0 equiv.)                                      | DMF     | 100 °C | 40                 |
| 3.    | 1,10-Phen<br>(0.3 equiv.) | $\text{AgNO}_3$<br>(1.0 equiv.)                                      | DMF     | 100 °C | 60                 |
| 4.    | 1,10-Phen<br>(0.3 equiv.) | $\text{AgNO}_3$<br>(2.0 equiv.)                                      | DMF     | 100 °C | 68                 |
| 5.    | 1,10-Phen<br>(0.3 equiv.) | $\text{AgNO}_3$<br>(2.0 equiv.)                                      | DMF     | >80 °C | 0                  |
| 6.    | 1,10-Phen<br>(0.3 equiv.) | $\text{Cu}(\text{OAc})_2$<br>(2.0 equiv.)<br>+ pyridine (10<br>mol%) | DMF     | 100 °C | 30                 |

<sup>a</sup>Reaction were carried out by using **1** (1.0 equiv.), **2** (1.2 equiv.) and  $\text{Pd}(\text{OAc})_2$  (15 mol %) in 3 mL of DMF for 8 h.

<sup>b</sup>Yield was calculated after column chromatography.

We conducted a series of reactions to optimize the catalyst and oxidant loadings. Reacting compounds **1a** and **2** with palladium acetate (15 mol%), a ligand (0.1 equiv.), and  $\text{AgNO}_3$  (1.0 equiv.) in DMF at 100°C yielded only 30%, with some starting material recovered. Increasing the ligand to 0.2 equiv. while keeping  $\text{AgNO}_3$  at 1.0 equiv. improved the yield to 40%. Further enhancement was observed using 1,10-phenanthroline (0.3 equiv.) and  $\text{Ag}_2\text{NO}_3$  (1.0 equiv.). The best yield, up to 68%, was achieved by increasing the  $\text{AgNO}_3$  loading to 2.0 equiv. (entry 4). It was also noted that the reaction did not proceed at temperatures below 80°C. Additionally, reacting **1a** and **2** with palladium acetate (15 mol%) and 1,10-phenanthroline (0.3 equiv.), in the presence of copper acetate (2.0 equiv.) and pyridine (10 mol%), resulted in a yield of 30% for the desired product **3a**.

### 3. Characterization Data

#### 3.1. Characterization Data of C-1 aryl enopyranones

##### (2R,3R)-3-(benzyloxy)-2-((benzyloxy)methyl)-6-phenyl-2,3-dihydro-4H-pyran-4-one (3a)

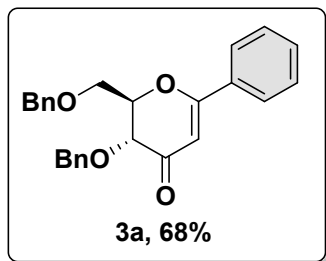

The compound **3a** was synthesized according to the general procedure (2.1.1) and purified using column chromatography over silica gel (60-120 mesh) using pet ether/ethyl acetate (95:05) as eluent to obtained yellow gummy liquid (68% yield, 33.0 mg).  $^1\text{H NMR}$  (400 MHz,  $\text{CDCl}_3$ )  $\delta$  7.69 – 7.62 (m, 2H), 7.44 – 7.38 (m, 1H), 7.35 (ddd,  $J = 8.4, 2.4, 0.9$  Hz, 2H), 7.31 – 7.20 (m, 10H), 5.90 (s, 1H), 5.06 (d,  $J = 11.1$  Hz, 1H), 4.61 (d,  $J = 11.1$  Hz, 1H), 4.58 – 4.47 (m, 3H), 4.23 (d,  $J = 11.4$  Hz, 1H), 3.90 – 3.80 (m, 2H).  $^{13}\text{C NMR}$  (101 MHz,  $\text{CDCl}_3$ )  $\delta$  194.1, 169.5, 137.8, 137.6, 132.3, 131.9, 128.7, 128.5, 128.4, 128.0, 127.9, 127.8, 126.7, 100.4, 80.9, 74.6, 73.8, 73.5, 68.0. HRMS (ESI),  $m/z$  calcd. for  $\text{C}_{26}\text{H}_{24}\text{O}_4$   $[\text{M}+\text{H}]^+$  401.1753, found 401.1759.

##### (2R,3R)-3-(benzyloxy)-2-((benzyloxy)methyl)-6-(p-tolyl)-2,3-dihydro-4H-pyran-4-one (3b)

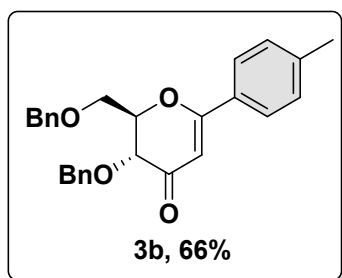

The compound **3b** was synthesized according to the general procedure (2.1.1) and purified using column chromatography over silica gel (60-120 mesh) using pet ether/ethyl acetate (95:05) as eluent to obtained yellow gummy liquid (66% yield, 33.0 mg).  $^1\text{H NMR}$  (400 MHz,  $\text{CDCl}_3$ )  $\delta$  7.55 (d,  $J = 8.3$  Hz, 2H), 7.32 – 7.21 (m, 10H), 7.15 (d,  $J = 8.0$  Hz, 2H), 5.88 (s, 1H), 5.07 (d,  $J = 11.1$  Hz, 1H), 4.61 (d,  $J = 11.1$  Hz, 1H), 4.57 – 4.46 (m, 3H), 4.21 (d,  $J = 11.3$  Hz, 1H), 3.89 – 3.79 (m, 2H), 2.33 (d,  $J = 6.4$  Hz, 3H).  $^{13}\text{C NMR}$  (101 MHz,  $\text{CDCl}_3$ )  $\delta$  194.0, 169.7, 142.5, 137.8, 137.6,

129.4, 128.5, 128.4, 128.4, 127.9, 127.8, 127.7, 126.7, 99.8, 80.8, 74.6, 73.8, 73.5, 68.0, 21.6.  
**HRMS** (ESI),  $m/z$  calcd. for  $C_{27}H_{26}O_4$   $[M+H]^+$  415.1909, found 415.1919.

**(2R,3R)-3-(benzyloxy)-2-((benzyloxy)methyl)-6-(m-tolyl)-2,3-dihydro-4H-pyran-4-one (3c)**

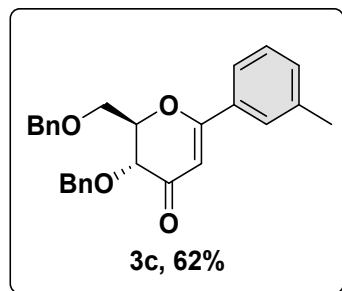

The compound **3c** was synthesized according to the general procedure (2.1.1) and purified using column chromatography over silica gel (60-120 mesh) using pet ether/ethyl acetate (95:05) as eluent to obtained yellow gummy liquid (62% yield, 31.0 mg).  **$^1H$  NMR** (400 MHz,  $CDCl_3$ )  $\delta$  7.44 (dd,  $J = 6.9, 2.6$  Hz, 2H), 7.30 – 7.23 (m, 8H), 7.23 – 7.18 (m, 4H), 5.87 (s, 1H), 5.05 (d,  $J = 11.1$  Hz, 1H), 4.58 (dd,  $J = 11.2, 8.3$  Hz, 2H), 4.54 – 4.49 (m, 2H), 4.20 (d,  $J = 11.3$  Hz, 1H), 3.88 – 3.74 (m, 2H), 2.30 (s, 3H).  **$^{13}C$  NMR** (101 MHz,  $CDCl_3$ )  $\delta$  194.1, 169.8, 138.4, 137.8, 137.6, 132.6, 132.2, 128.6, 128.6, 128.5, 128.4, 128.0, 127.9, 127.7, 127.3, 127.0, 123.9, 100.3, 80.9, 74.6, 73.9, 73.5, 68.0, 21.5. **HRMS** (ESI),  $m/z$  calcd. for  $C_{27}H_{27}O_4$   $[M+H]^+$  415.1909, found 415.1910.

**(2R,3R)-3-(benzyloxy)-2-((benzyloxy)methyl)-6-(2,3-dimethylphenyl)-2,3-dihydro-4H-pyran-4-one (3d)**

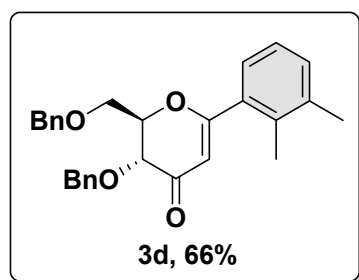

The compound **3d** was synthesized according to the general procedure (2.1.1) and purified using column chromatography over silica gel (60-120 mesh) using pet ether/ethyl acetate (95:05) as eluent to obtained yellow gummy liquid (66% yield, 34.0 mg).  **$^1H$  NMR** (400 MHz,  $CDCl_3$ )  $\delta$  7.38 – 7.26 (m, 11H), 7.21 (dd,  $J = 10.6, 7.0$  Hz, 2H), 7.11 (t,  $J = 7.6$  Hz, 1H), 5.55 (s, 1H), 5.14 (d,  $J = 11.1$  Hz, 1H), 4.68 (d,  $J = 8.3$  Hz, 1H), 4.56 (dt,  $J = 25.4, 7.9$  Hz, 3H), 4.34 (d,  $J = 11.5$  Hz, 1H), 3.91 – 3.81 (m, 2H), 2.29 (s, 3H), 2.26 (s, 3H).  **$^{13}C$  NMR** (101 MHz,  $CDCl_3$ )  $\delta$  193.9, 173.8,

137.8, 137.7, 137.7, 135.2, 134.0, 132.1, 128.5, 128.4, 128.4, 128.0, 127.8, 127.7, 127.0, 126.7, 125.6, 105.1, 81.1, 74.6, 73.9, 73.6, 68.2, 20.4, 17.0. **HRMS** (ESI),  $m/z$  calcd. for  $C_{28}H_{29}O_4$   $[M+H]^+$  429.2066, found 429.2076.

**(2R,3R)-3-(benzyloxy)-2-((benzyloxy)methyl)-6-(2,6-dimethylphenyl)-2,3-dihydro-4H-pyran-4-one (3e)**

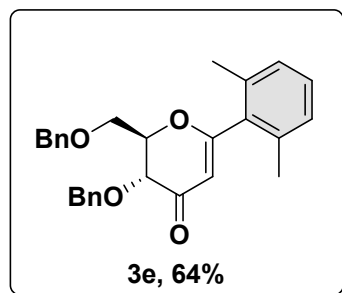

The compound **3e** was synthesized according to the general procedure (2.1.1) and purified using column chromatography over silica gel (60-120 mesh) using pet ether/ethyl acetate (95:05) as eluent to obtained yellow gummy liquid (64% yield, 33.0 mg).  **$^1H$  NMR** (400 MHz,  $CDCl_3$ )  $\delta$  7.39 – 7.26 (m, 13H), 7.10 (s, 1H), 5.94 (s, 1H), 5.14 (d,  $J = 11.1$  Hz, 1H), 4.67 (d,  $J = 8.8$  Hz, 1H), 4.64 – 4.52 (m, 3H), 4.27 (d,  $J = 11.3$  Hz, 1H), 3.91 (qd,  $J = 11.1, 3.3$  Hz, 2H), 2.33 (s, 6H).  **$^{13}C$  NMR** (101 MHz,  $CDCl_3$ )  $\delta$  194.1, 170.0, 138.3, 137.9, 137.7, 133.6, 132.2, 128.5, 128.4, 128.0, 127.9, 127.7, 124.5, 100.3, 80.9, 74.6, 73.9, 73.5, 68.0, 21.4. **HRMS** (ESI),  $m/z$  calcd. for  $C_{28}H_{29}O_4$   $[M+H]^+$  429.2066, found 429.2058.

**(2R,3R)-3-(benzyloxy)-2-((benzyloxy)methyl)-6-(2-ethylphenyl)-2,3-dihydro-4H-pyran-4-one (3f)**

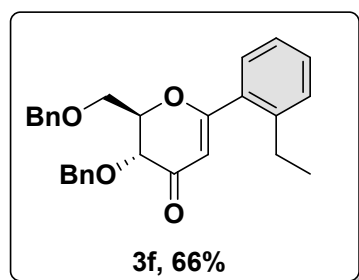

The compound **3f** was synthesized according to the general procedure (2.1.1) and purified using column chromatography over silica gel (60-120 mesh) using pet ether/ethyl acetate (95:05) as eluent to obtained yellow gummy liquid (66% yield, 34.0 mg).  **$^1H$  NMR** (400 MHz,  $CDCl_3$ )  $\delta$  7.40 – 7.18 (m, 15H), 5.59 (s, 1H), 5.15 (d,  $J = 11.1$  Hz, 1H), 4.68 (d,  $J = 11.1$  Hz, 1H), 4.62 – 4.57 (m, 1H), 4.57 – 4.50 (m, 2H), 4.35 (d,  $J = 11.5$  Hz, 1H), 3.92 – 3.83 (m, 2H), 2.83 – 2.65 (m, 2H), 1.20



(t,  $J = 7.5$  Hz, 3H).  $^{13}\text{C}$  NMR (101 MHz,  $\text{CDCl}_3$ )  $\delta$  193.9, 173.6, 143.1, 137.7, 137.6, 132.9, 130.8, 129.6, 129.2, 128.4, 128.4, 128.4, 127.9, 127.8, 127.7, 125.9, 104.7, 81.2, 74.6, 73.8, 73.6, 68.1, 26.9, 15.8. HRMS (ESI),  $m/z$  calcd. for  $\text{C}_{28}\text{H}_{29}\text{O}_4$   $[\text{M}+\text{H}]^+$  429.2066, found 429.2057.

**(2R,3R)-3-(benzyloxy)-2-((benzyloxy)methyl)-6-(3-methoxyphenyl)-2,3-dihydro-4H-pyran-4-one (3g)**

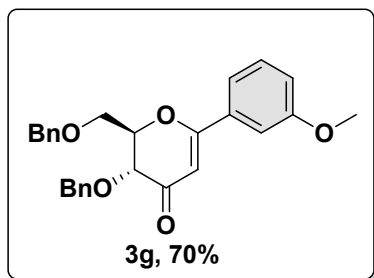

The compound **3g** was synthesized according to the general procedure (2.1.1) and purified using column chromatography over silica gel (60-120 mesh) using pet ether/ethyl acetate (95:05) as eluent to obtain white gummy liquid (70% yield, 36.0 mg).  $^1\text{H}$  NMR (400 MHz,  $\text{CDCl}_3$ )  $\delta$  7.40 – 7.23 (m, 14H), 7.00 (s, 1H), 5.96 (s, 1H), 5.13 (d,  $J = 11.1$  Hz, 1H), 4.67 (d,  $J = 11.1$  Hz, 1H), 4.64 – 4.54 (m, 3H), 4.28 (d,  $J = 11.2$  Hz, 1H), 3.96 – 3.86 (m, 2H), 3.79 (s, 3H).  $^{13}\text{C}$  NMR (101 MHz,  $\text{CDCl}_3$ )  $\delta$  194.0, 169.3, 159.8, 137.8, 137.6, 133.7, 129.7, 128.5, 128.4, 128.0, 127.9, 127.7, 119.2, 117.6, 111.9, 100.6, 81.0, 74.6, 73.9, 73.5, 68.0, 55.4. HRMS (ESI),  $m/z$  calcd. for  $\text{C}_{27}\text{H}_{27}\text{O}_5$   $[\text{M}+\text{H}]^+$  431.1858, found 431.1848.

**(2R,3R)-3-(benzyloxy)-2-((benzyloxy)methyl)-6-(2,4-dimethoxyphenyl)-2,3-dihydro-4H-pyran-4-one (3h)**

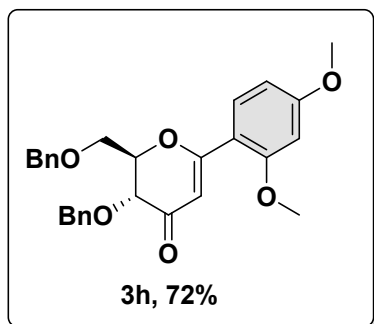

The compound **3h** was synthesized according to the general procedure (2.1.1) and purified using column chromatography over silica gel (60-120 mesh) using pet ether/ethyl acetate (93:07) as eluent to obtain white gummy liquid (72% yield, 40.0 mg).  $^1\text{H}$  NMR (400 MHz,  $\text{CDCl}_3$ )  $\delta$  7.65 (d,  $J = 8.8$  Hz, 1H), 7.30 – 7.18 (m, 11H), 6.44 (dd,  $J = 8.8, 2.4$  Hz, 1H), 6.38 (d,  $J = 2.3$  Hz, 1H),

6.24 (s, 1H), 5.06 (d,  $J = 11.2$  Hz, 1H), 4.60 (d,  $J = 11.2$  Hz, 1H), 4.51 (q,  $J = 12.1$  Hz, 2H), 4.43 (ddd,  $J = 11.5, 4.0, 2.8$  Hz, 1H), 4.18 (d,  $J = 11.5$  Hz, 1H), 3.85 – 3.78 (m, 2H), 3.75 (d,  $J = 2.3$  Hz, 6H).  $^{13}\text{C}$  NMR (101 MHz,  $\text{CDCl}_3$ )  $\delta$  194.8, 166.5, 163.4, 160.1, 137.9, 137.8, 130.9, 128.5, 128.4, 128.4, 127.9, 127.8, 127.7, 113.9, 105.0, 104.3, 98.7, 80.4, 74.5, 73.9, 73.5, 68.3, 55.6, 55.5. HRMS (ESI),  $m/z$  calcd. for  $\text{C}_{28}\text{H}_{29}\text{O}_6$   $[\text{M}+\text{H}]^+$  461.1964, found 461.1960.

**(2R,3R)-3-(benzyloxy)-2-((benzyloxy)methyl)-6-(4-ethoxyphenyl)-2,3-dihydro-4H-pyran-4-one (3i)**

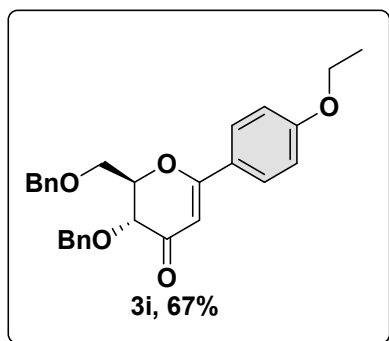

The compound **3i** was synthesized according to the general procedure (2.1.1) and purified using column chromatography over silica gel (60-120 mesh) using pet ether/ethyl acetate (95:05) as eluent to obtained yellow gummy liquid (67% yield, 33.0 mg).  $^1\text{H}$  NMR (400 MHz,  $\text{CDCl}_3$ )  $\delta$  7.58 (d,  $J = 8.9$  Hz, 2H), 7.30 – 7.17 (m, 11H), 6.84 – 6.77 (m, 2H), 5.81 (d,  $J = 0.7$  Hz, 1H), 5.05 (d,  $J = 11.2$  Hz, 1H), 4.59 (d,  $J = 11.2$  Hz, 1H), 4.55 – 4.44 (m, 3H), 4.17 (d,  $J = 11.2$  Hz, 1H), 3.97 (q,  $J = 7.0$  Hz, 2H), 3.85 – 3.76 (m, 2H), 1.33 (t,  $J = 7.0$  Hz, 3H).  $^{13}\text{C}$  NMR (101 MHz,  $\text{CDCl}_3$ )  $\delta$  193.8, 169.5, 162.0, 137.8, 137.7, 128.6, 128.5, 128.4, 128.4, 127.9, 127.8, 127.7, 124.3, 114.5, 98.9, 80.8, 74.5, 73.8, 73.5, 68.1, 63.7, 14.7. HRMS (ESI),  $m/z$  calcd. for  $\text{C}_{28}\text{H}_{29}\text{O}_5$   $[\text{M}+\text{H}]^+$  445.2015, found 445.2013.

**(2R,3R)-3-(benzyloxy)-2-((benzyloxy)methyl)-6-(naphthalen-2-yl)-2,3-dihydro-4H-pyran-4-one (3j)**

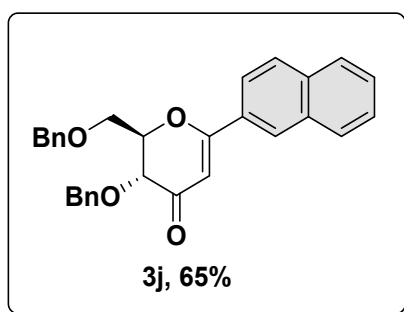

The compound **3j** was synthesized according to the general procedure (2.1.1) and purified using column chromatography over silica gel (60-120 mesh) using pet ether/ethyl acetate (95:05) as eluent to obtained yellow gummy liquid (65% yield, 35.0 mg). **<sup>1</sup>H NMR** (400 MHz, CDCl<sub>3</sub>) δ 8.20 (d, *J* = 8.5 Hz, 1H), 7.93 (d, *J* = 8.2 Hz, 1H), 7.89 – 7.84 (m, 1H), 7.64 (dd, *J* = 7.2, 1.2 Hz, 1H), 7.48 (ddd, *J* = 15.4, 7.9, 4.3 Hz, 3H), 7.43 – 7.28 (m, 11H), 5.80 (s, 1H), 5.17 (d, *J* = 11.2 Hz, 1H), 4.78 – 4.70 (m, 2H), 4.56 (q, *J* = 12.0 Hz, 2H), 4.43 (d, *J* = 11.3 Hz, 1H), 3.93 (d, *J* = 3.3 Hz, 2H). **<sup>13</sup>C NMR** (101 MHz, CDCl<sub>3</sub>) δ 193.8, 172.3, 137.8, 137.6, 133.7, 131.6, 131.3, 130.4, 128.6, 128.6, 128.5, 128.4, 128.0, 127.8, 127.7, 127.5, 127.2, 127.0, 126.4, 125.3, 124.9, 105.6, 81.4, 74.6, 73.9, 73.6, 68.2. **HRMS** (ESI), *m/z* calcd. for C<sub>30</sub>H<sub>27</sub>O<sub>4</sub> [M+H]<sup>+</sup> 451.1909, found 451.1915. **(2R,3R)-3-(benzyloxy)-2-((benzyloxy)methyl)-6-(4-chlorophenyl)-2,3-dihydro-4H-pyran-4-one (3k)**

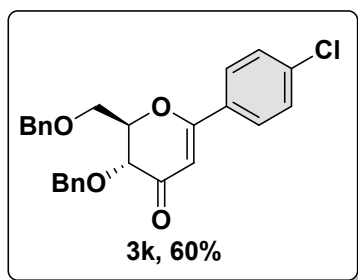

The compound **3k** was synthesized according to the general procedure (2.1.1) and purified using column chromatography over silica gel (60-120 mesh) using pet ether/ethyl acetate (95:05) as eluent to obtained yellow gummy liquid (60% yield, 29.0 mg). **<sup>1</sup>H NMR** (400 MHz, CDCl<sub>3</sub>) δ 7.67 – 7.63 (m, 2H), 7.40 – 7.28 (m, 13H), 5.94 (s, 1H), 5.12 (d, *J* = 11.1 Hz, 1H), 4.67 (d, *J* = 11.0 Hz, 1H), 4.64 – 4.54 (m, 3H), 4.28 (d, *J* = 11.3 Hz, 1H), 3.95 – 3.86 (m, 2H). **<sup>13</sup>C NMR** (101 MHz, CDCl<sub>3</sub>) δ 193.9, 168.2, 137.9, 137.7, 137.5, 130.7, 129.0, 128.5, 128.4, 128.0, 127.9, 127.9, 127.8, 100.5, 81.0, 74.6, 73.7, 73.5, 67.9. **HRMS** (ESI), *m/z* calcd. for C<sub>26</sub>H<sub>24</sub>ClO<sub>4</sub> [M+H]<sup>+</sup> 435.1363, found 435.1353.

**(2R,3R)-3-(benzyloxy)-2-((benzyloxy)methyl)-6-(2-chlorophenyl)-2,3-dihydro-4H-pyran-4-one (3l)**

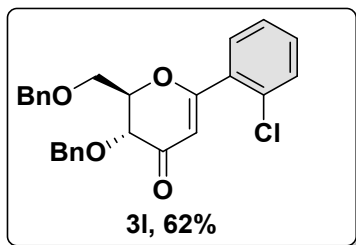

The compound **3l** was synthesized according to the general procedure (2.1.1) and purified using column chromatography over silica gel (60-120 mesh) using pet ether/ethyl acetate (95:05) as eluent to obtained yellow gummy liquid (62% yield, 30.0 mg). **<sup>1</sup>H NMR** (400 MHz, CDCl<sub>3</sub>) δ 7.39 (dd, *J* = 7.6, 1.8 Hz, 1H), 7.36 – 7.31 (m, 1H), 7.30 – 7.18 (m, 13H), 5.67 (s, 1H), 5.05 (d, *J* = 11.0 Hz, 1H), 4.61 – 4.49 (m, 3H), 4.44 (d, *J* = 12.1 Hz, 1H), 4.29 (d, *J* = 11.6 Hz, 1H), 3.82 (d, *J* = 3.1 Hz, 2H). **<sup>13</sup>C NMR** (101 MHz, CDCl<sub>3</sub>) δ 194.0, 169.5, 137.7, 137.6, 132.8, 132.6, 131.7, 130.7, 130.4, 128.5, 128.4, 128.4, 128.0, 127.9, 127.8, 126.8, 105.9, 81.6, 74.7, 73.9, 73.6, 68.0. **HRMS** (ESI), *m/z* calcd. for C<sub>26</sub>H<sub>24</sub>ClO<sub>4</sub> [M+H]<sup>+</sup> 435.1363, found 435.1346.

**(2R,3S)-3-(benzyloxy)-2-((benzyloxy)methyl)-6-phenyl-2,3-dihydro-4H-pyran-4-one (3m)**

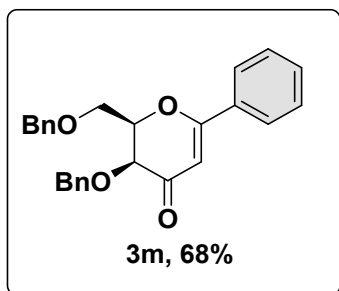

The compound **3m** was synthesized according to the general procedure (2.1.1) and purified using column chromatography over silica gel (60-120 mesh) using pet ether/ethyl acetate (95:05) as eluent to obtained yellow gummy liquid (68% yield, 33 mg). **<sup>1</sup>H NMR** (400 MHz, CDCl<sub>3</sub>) δ 7.67 – 7.63 (m, 2H), 7.39 – 7.34 (m, 1H), 7.33 – 7.16 (m, 12H), 5.94 (d, *J* = 1.3 Hz, 1H), 4.68 (d, *J* = 11.9 Hz, 1H), 4.58 – 4.43 (m, 4H), 3.95 (dd, *J* = 10.2, 6.9 Hz, 1H), 3.81 (dd, *J* = 10.2, 5.6 Hz, 1H), 3.70 (dd, *J* = 2.4, 1.3 Hz, 1H). **<sup>13</sup>C NMR** (101 MHz, CDCl<sub>3</sub>) δ 190.4, 169.8, 137.8, 137.2, 132.4, 131.9, 128.7, 128.6, 128.4, 128.4, 128.0, 127.9, 127.8, 126.8, 100.3, 80.6, 73.7, 72.1, 67.8. **HRMS** (ESI), *m/z* calcd. for C<sub>26</sub>H<sub>25</sub>O<sub>4</sub> [M+H]<sup>+</sup> 401.1753, found 401.1747.

**(2R,3S)-3-(benzyloxy)-2-((benzyloxy)methyl)-6-(naphthalen-2-yl)-2,3-dihydro-4H-pyran-4-one (3n)**

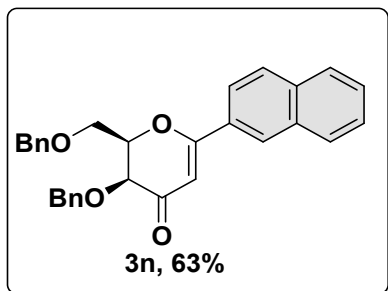

The compound **3n** was synthesized according to the general procedure (2.1.1) and purified using column chromatography over silica gel (60-120 mesh) using pet ether/ethyl acetate (95:05) as eluent to obtained yellow gummy liquid (63% yield, 34 mg). **<sup>1</sup>H NMR** (400 MHz, CDCl<sub>3</sub>) δ 8.11 (d, *J* = 8.2 Hz, 1H), 7.83 (d, *J* = 8.3 Hz, 1H), 7.79 – 7.73 (m, 1H), 7.56 (dd, *J* = 7.1, 1.1 Hz, 1H), 7.43 – 7.34 (m, 3H), 7.30 – 7.17 (m, 11H), 5.75 (d, *J* = 1.1 Hz, 1H), 4.81 – 4.70 (m, 2H), 4.59 – 4.40 (m, 3H), 3.95 (dd, *J* = 10.3, 7.0 Hz, 1H), 3.84 (dd, *J* = 10.3, 5.4 Hz, 1H), 3.80 – 3.78 (m, 1H). **<sup>13</sup>C NMR** (101 MHz, CDCl<sub>3</sub>) δ 190.3, 172.6, 137.7, 137.4, 133.7, 131.6, 131.5, 130.5, 128.6, 128.5, 128.5, 128.3, 128.0, 127.9, 127.7, 127.6, 127.2, 126.4, 125.4, 124.9, 105.5, 81.1, 73.8, 73.7, 72.0, 67.8. **HRMS** (ESI), *m/z* calcd. for C<sub>30</sub>H<sub>26</sub>O<sub>4</sub> [M+H]<sup>+</sup> 451.1909, found 451.1895.

**(2S,3S)-3-(benzyloxy)-2-methyl-6-phenyl-2,3-dihydro-4H-pyran-4-one (3o)**

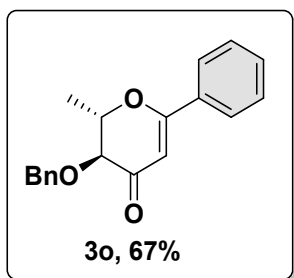

The compound **3o** was synthesized according to the general procedure (2.1.1) and purified using column chromatography over silica gel (60-120 mesh) using pet ether/ethyl acetate (97:03) as eluent to obtained yellow gummy liquid (67% yield, 32.0 mg). **<sup>1</sup>H NMR** (400 MHz, CDCl<sub>3</sub>) δ 7.64 – 7.60 (m, 2H), 7.39 – 7.20 (m, 8H), 5.88 (s, 1H), 5.01 (d, *J* = 11.5 Hz, 1H), 4.66 – 4.60 (m, 1H), 4.53 (dd, *J* = 10.0, 6.4 Hz, 1H), 3.71 (d, *J* = 10.0 Hz, 1H), 1.44 (d, *J* = 6.4 Hz, 3H). **<sup>13</sup>C NMR** (101 MHz, CDCl<sub>3</sub>) δ 193.8, 169.3, 137.5, 132.4, 131.7, 128.7, 128.5, 128.5, 128.0, 126.6, 100.3, 78.4, 78.3, 74.0, 17.4. **HRMS** (ESI), *m/z* calcd. for C<sub>19</sub>H<sub>19</sub>O<sub>3</sub> [M+H]<sup>+</sup> 295.1334, found 295.1325.

**(2R,3R)-3-ethoxy-2-(ethoxymethyl)-6-phenyl-2,3-dihydro-4H-pyran-4-one (3p)**

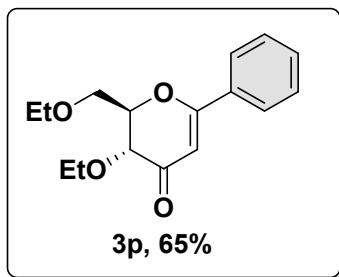

The compound **3p** was synthesized according to the general procedure (2.1.1) and purified using column chromatography over silica gel (60-120 mesh) using pet ether/ethyl acetate (95:05) as eluent to obtained yellow gummy liquid (65% yield, 39 mg).  $^1\text{H NMR}$  (400 MHz,  $\text{CDCl}_3$ )  $\delta$  7.69 – 7.61 (m, 2H), 7.43 – 7.28 (m, 3H), 5.87 (s, 1H), 4.42 (ddd,  $J = 11.4, 3.9, 2.6$  Hz, 1H), 4.07 (d,  $J = 11.4$  Hz, 1H), 4.04 – 3.97 (m, 1H), 3.83 (qd,  $J = 11.2, 3.3$  Hz, 2H), 3.65 – 3.47 (m, 3H), 1.18 (t,  $J = 6.8$  Hz, 6H).  $^{13}\text{C NMR}$  (101 MHz,  $\text{CDCl}_3$ )  $\delta$  194.3, 169.4, 132.3, 131.7, 128.6, 126.6, 100.3, 81.2, 74.6, 68.5, 68.4, 67.2, 15.3, 15.1. **HRMS** (ESI),  $m/z$  calcd. for  $\text{C}_{16}\text{H}_{21}\text{O}_4$   $[\text{M}+\text{H}]^+$  277.1440, found 277.1448.

**(2R,3S)-3-((tert-butyldimethylsilyloxy)-2-(((tert-butyldimethylsilyloxy)methyl)-6-phenyl-2,3-dihydro-4H-pyran-4-one (3q)**

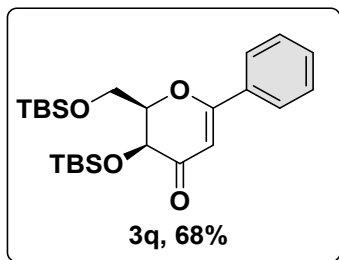

The compound **3q** was synthesized according to the general procedure (2.1.1) and purified using column chromatography over silica gel (60-120 mesh) using pet ether/ethyl acetate (97:03) as eluent to obtained yellow gummy liquid (68% yield, 42 mg).  $^1\text{H NMR}$  (400 MHz,  $\text{CDCl}_3$ )  $\delta$  7.65 (d,  $J = 7.7$  Hz, 2H), 7.43 – 7.30 (m, 3H), 5.83 (s, 1H), 4.43 (d,  $J = 12.1$  Hz, 1H), 4.25 (d,  $J = 12.0$  Hz, 1H), 4.13 – 3.95 (m, 2H), 0.85 (d,  $J = 11.6$  Hz, 18H), 0.19 (s, 3H), 0.05 (s, 6H), 0.02 (s, 3H).  $^{13}\text{C NMR}$  (101 MHz,  $\text{CDCl}_3$ )  $\delta$  194.4, 169.2, 132.5, 131.5, 128.6, 126.5, 99.8, 83.6, 69.2, 61.6, 25.9, 25.9, -3.9, -5.1, -5.2, -5.6. **HRMS** (ESI),  $m/z$  calcd. for  $\text{C}_{24}\text{H}_{40}\text{O}_4\text{Si}_2$   $[\text{M}+\text{H}]^+$  449.2543, found 449.2543.

**(2R,3R)-3-(benzyloxy)-2-((benzyloxy)methyl)-6-(4-chloro-3-(4-ethoxybenzyl)phenyl)-2,3-dihydro-4H-pyran-4-one (4a)**

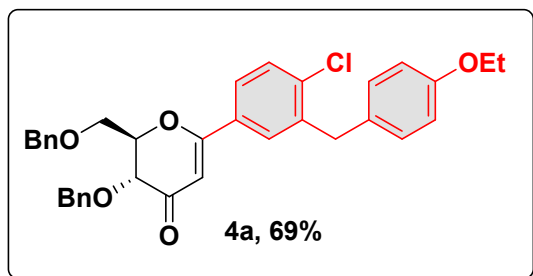

The compound **4a** was synthesized according to the general procedure (2.1.1) and purified using column chromatography over silica gel (60-120 mesh) using pet ether/ethyl acetate (95:05) as eluent to obtained white gummy liquid (68% yield, 47 mg). **<sup>1</sup>H NMR** (400 MHz, CDCl<sub>3</sub>) δ 7.52 (d, *J* = 9.5 Hz, 2H), 7.42 (d, *J* = 8.2 Hz, 1H), 7.38 – 7.28 (m, 10H), 7.08 (d, *J* = 8.3 Hz, 2H), 6.83 (d, *J* = 8.3 Hz, 2H), 5.87 (s, 1H), 5.11 (d, *J* = 11.2 Hz, 1H), 4.67 (d, *J* = 11.1 Hz, 1H), 4.63 – 4.52 (m, 3H), 4.26 (d, *J* = 11.1 Hz, 1H), 4.09 – 3.94 (m, 4H), 3.88 (d, *J* = 2.8 Hz, 2H), 1.40 (t, *J* = 7.0 Hz, 3H). **<sup>13</sup>C NMR** (101 MHz, CDCl<sub>3</sub>) δ 193.7, 168.4, 157.7, 139.8, 137.9, 137.7, 137.5, 131.0, 130.5, 129.9, 129.8, 128.9, 128.5, 128.4, 127.9, 127.8, 127.7, 125.7, 114.7, 100.5, 81.1, 74.5, 73.8, 73.6, 68.0, 63.4, 38.4, 14.9. **HRMS** (ESI), *m/z* calcd. for C<sub>35</sub>H<sub>33</sub>ClO<sub>5</sub> [M+H]<sup>+</sup> 569.2095, found 569.2103.

**(2R,3R)-3-((tert-butyldimethylsilyl)oxy)-2-(((tert-butyldimethylsilyl)oxy)methyl)-6-(4-chloro-3-(4-ethoxybenzyl)phenyl)-2,3-dihydro-4H-pyran-4-one (4b)**

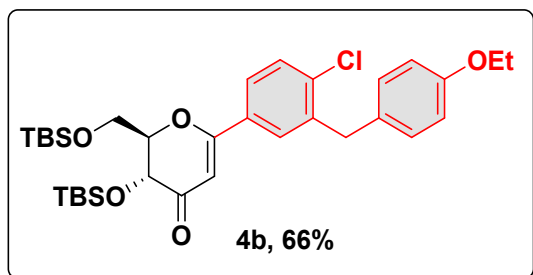

The compound **4b** was synthesized according to the general procedure (2.1.1) and purified using column chromatography over silica gel (60-120 mesh) using pet ether/ethyl acetate (97:03) as eluent to obtained white gummy liquid (66% yield, 41 mg). **<sup>1</sup>H NMR** (400 MHz, CDCl<sub>3</sub>) δ 7.56 (d, *J* = 9.1 Hz, 2H), 7.47 (d, *J* = 8.1 Hz, 1H), 7.14 (d, *J* = 8.3 Hz, 2H), 6.88 (d, *J* = 8.3 Hz, 2H), 5.85 (s, 1H), 4.53 (d, *J* = 12.1 Hz, 1H), 4.34 (d, *J* = 12.1 Hz, 1H), 4.08 (dt, *J* = 13.9, 11.4 Hz, 6H), 1.45 (t, *J* = 7.0 Hz, 3H), 0.98 (s, 9H), 0.95 (s, 9H), 0.31 (s, 3H), 0.16 (d, *J* = 8.0 Hz, 6H), 0.12 (s,

3H).  $^{13}\text{C}$  NMR (101 MHz,  $\text{CDCl}_3$ )  $\delta$  194.3, 168.1, 157.7, 139.8, 137.7, 131.2, 130.6, 129.9, 128.8, 125.5, 114.7, 99.9, 83.6, 69.2, 63.4, 61.6, 38.4, 26.0, 25.9, 18.6, 18.4, 14.9, -3.9, -5.1, -5.2, -5.6. HRMS (ESI),  $m/z$  calcd. for  $\text{C}_{33}\text{H}_{49}\text{ClO}_5\text{Si}_2$   $[\text{M}+\text{H}]^+$  617.2885, found 617.2890.

**(2R,3R)-3-(benzyloxy)-2-((benzyloxy)methyl)-6-(4-chloro-3-((5-(4-fluorophenyl)thiophen-2-yl)methyl)phenyl)-2,3-dihydro-4H-pyran-4-one (4c)**

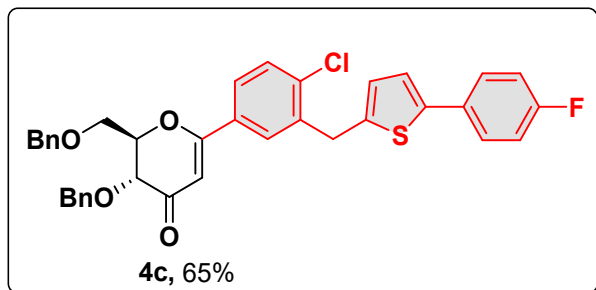

The compound **4c** was synthesized according to the general procedure (2.1.1) and purified using column chromatography over silica gel (60-120 mesh) using pet ether/ethyl acetate (97:03) as eluent to obtained white gummy liquid (65% yield, 41 mg).  $^1\text{H}$  NMR (400 MHz,  $\text{CDCl}_3$ )  $\delta$  7.74 (d,  $J = 1.9$  Hz, 1H), 7.67 (dd,  $J = 8.1, 1.9$  Hz, 1H), 7.59 – 7.52 (m, 2H), 7.31 – 7.12 (m, 13H), 7.08 – 7.00 (m, 2H), 5.89 (s, 1H), 5.04 (d,  $J = 11.1$  Hz, 1H), 4.60 (d,  $J = 11.1$  Hz, 1H), 4.54 – 4.44 (m, 3H), 4.21 (d,  $J = 11.2$  Hz, 1H), 3.87 – 3.76 (m, 2H), 2.36 (s, 2H).  $^{13}\text{C}$  NMR (101 MHz,  $\text{CDCl}_3$ )  $\delta$  193.8, 189.1, 168.5, 164.6, 162.1, 153.4, 142.9, 140.7, 138.8, 137.6, 137.5, 136.8, 131.6, 129.6, 128.5, 128.4, 128.3, 128.2, 128.0, 127.9, 127.7, 126.0, 124.2, 116.4, 116.2, 100.3, 81.1, 74.6, 73.7, 73.5, 67.9. HRMS (ESI),  $m/z$  calcd. for  $\text{C}_{37}\text{H}_{30}\text{ClFO}_4\text{S}$   $[\text{M}+\text{H}]^+$  625.1616, found 625.1620.

**(2R,3S,4R,6R)-6-(2,3-dimethylphenyl)-2-(hydroxymethyl)tetrahydro-2H-pyran-3,4-diol (7)**

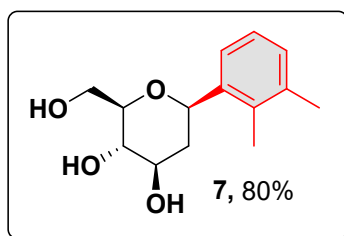

The compound **7** was synthesized according to the general procedure (2.1.2) and purified using column chromatography over silica gel (60-120 mesh) using pet DCM/MeOH (98:02) as eluent to obtained white foamy liquid (80% yield, 9.5 mg).  $^1\text{H}$  NMR (400 MHz, MeOD)  $\delta$  7.22 (t,  $J = 4.6$  Hz, 1H), 6.95 (d,  $J = 5.1$  Hz, 2H), 4.62 (dd,  $J = 11.3, 1.3$  Hz, 1H), 3.80 (dd,  $J = 11.9, 2.2$  Hz, 1H),



3.67 – 3.57 (m, 2H), 3.29 (ddd,  $J = 9.3, 5.8, 2.2$  Hz, 1H), 3.23 – 3.18 (m, 1H), 2.16 (s, 3H), 2.13 (s, 3H), 2.03 (ddd,  $J = 12.9, 4.9, 1.6$  Hz, 1H), 1.59 – 1.48 (m, 1H).  $^{13}\text{C}$  NMR (101 MHz, MeOD)  $\delta$  139.2, 136.3, 133.2, 128.6, 125.1, 123.1, 80.9, 74.6, 72.9, 72.1, 61.9, 39.7, 19.3, 13.5. HRMS (ESI),  $m/z$  calcd. for  $\text{C}_{14}\text{H}_{21}\text{O}_4$   $[\text{M}+\text{H}]^+$  253.1440, found 253.1449.  $[\alpha]_{\text{D}} = +22.30$  ( $c = 0.5$ , MeOH).

**(2R,3S,4R)-3-(benzyloxy)-2-((benzyloxy)methyl)-6-(4-chloro-3-(4-ethoxybenzyl)phenyl)-3,4-dihydro-2H-pyran-4-ol (8)**

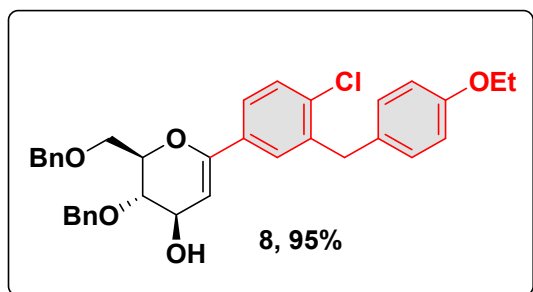

The compound **8** was synthesized according to the general procedure (2.1.3) and purified using column chromatography over silica gel (60-120 mesh) using pet ether/ethyl acetate (95:05) as eluent to obtained white gummy liquid (95% yield, 44 mg).  $^1\text{H}$  NMR (400 MHz,  $\text{CDCl}_3$ )  $\delta$  7.46 – 7.26 (m, 14H), 7.09 (d,  $J = 8.2$  Hz, 2H), 6.81 (d,  $J = 8.2$  Hz, 2H), 5.25 (d,  $J = 2.6$  Hz, 1H), 4.79 (dd,  $J = 26.9, 11.6$  Hz, 2H), 4.63 (q,  $J = 12.1$  Hz, 2H), 4.47 (d,  $J = 3.1$  Hz, 1H), 4.15 (d,  $J = 8.7$  Hz, 1H), 4.06 – 3.88 (m, 6H), 3.82 – 3.73 (m, 1H), 1.40 (t,  $J = 6.9$  Hz, 3H).  $^{13}\text{C}$  NMR (101 MHz,  $\text{CDCl}_3$ )  $\delta$  157.5, 151.7, 138.8, 138.3, 138.0, 134.6, 133.1, 131.2, 129.8, 129.3, 128.6, 128.4, 128.0, 127.9, 127.7, 124.4, 114.5, 98.9, 73.7, 73.6, 69.7, 68.9, 63.4, 38.5, 14.9. HRMS (ESI),  $m/z$  calcd. for  $\text{C}_{35}\text{H}_{35}\text{ClO}_5$   $[\text{M}+\text{H}]^+$  571.2251, found 571.2255.  $[\alpha]_{\text{D}} = +38.20$  ( $c = 0.5$ ,  $\text{CHCl}_3$ ).

**(2R,3R,6S)-3,4-bis(benzyloxy)-2-((benzyloxy)methyl)-6-(4-methoxyphenyl)-3,6-dihydro-2H-pyran (9)**

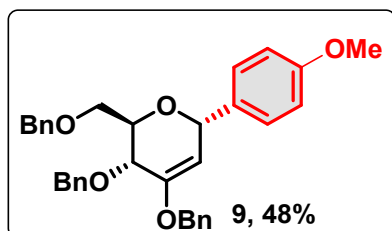

The compound **8** was synthesized and purified using column chromatography over silica gel (60-120 mesh) using pet ether/ethyl acetate (95:05) as eluent to obtained white gummy liquid (48% yield, 60 mg).  $^1\text{H}$  NMR (400 MHz,  $\text{CDCl}_3$ )  $\delta$  7.43 – 7.29 (m, 12H), 7.26 – 7.22 (m, 5H), 7.12 (d,

$J = 7.9$  Hz, 2H), 5.35 (d,  $J = 3.2$  Hz, 1H), 5.01 (d,  $J = 3.6$  Hz, 1H), 4.94 – 4.82 (m, 3H), 4.56 (s, 1H), 4.53 (s, 1H), 4.42 (d,  $J = 12.1$  Hz, 1H), 4.23 (dd,  $J = 6.7, 1.1$  Hz, 1H), 3.88 (dt,  $J = 6.8, 4.1$  Hz, 1H), 3.65 (dd,  $J = 10.4, 4.6$  Hz, 1H), 3.54 (dd,  $J = 10.4, 3.6$  Hz, 1H), 2.32 (s, 3H).  $^{13}\text{C}$  NMR (101 MHz,  $\text{CDCl}_3$ )  $\delta$  153.28, 138.46, 138.17, 137.71, 137.66, 136.91, 128.95, 128.53, 128.36, 128.28, 128.26, 128.23, 127.94, 127.87, 127.65, 127.62, 127.43, 98.97, 73.57, 73.56, 73.23, 72.08, 71.39, 69.15, 68.83, 21.19. HRMS (ESI),  $m/z$  calcd. for  $\text{C}_{34}\text{H}_{34}\text{O}_5$   $[\text{M}+\text{H}]^+$  523.2484, found 523.2490.

## 4. NMR Spectra

$^1\text{H}$  NMR (400 MHz) of **3a** in  $\text{CDCl}_3$

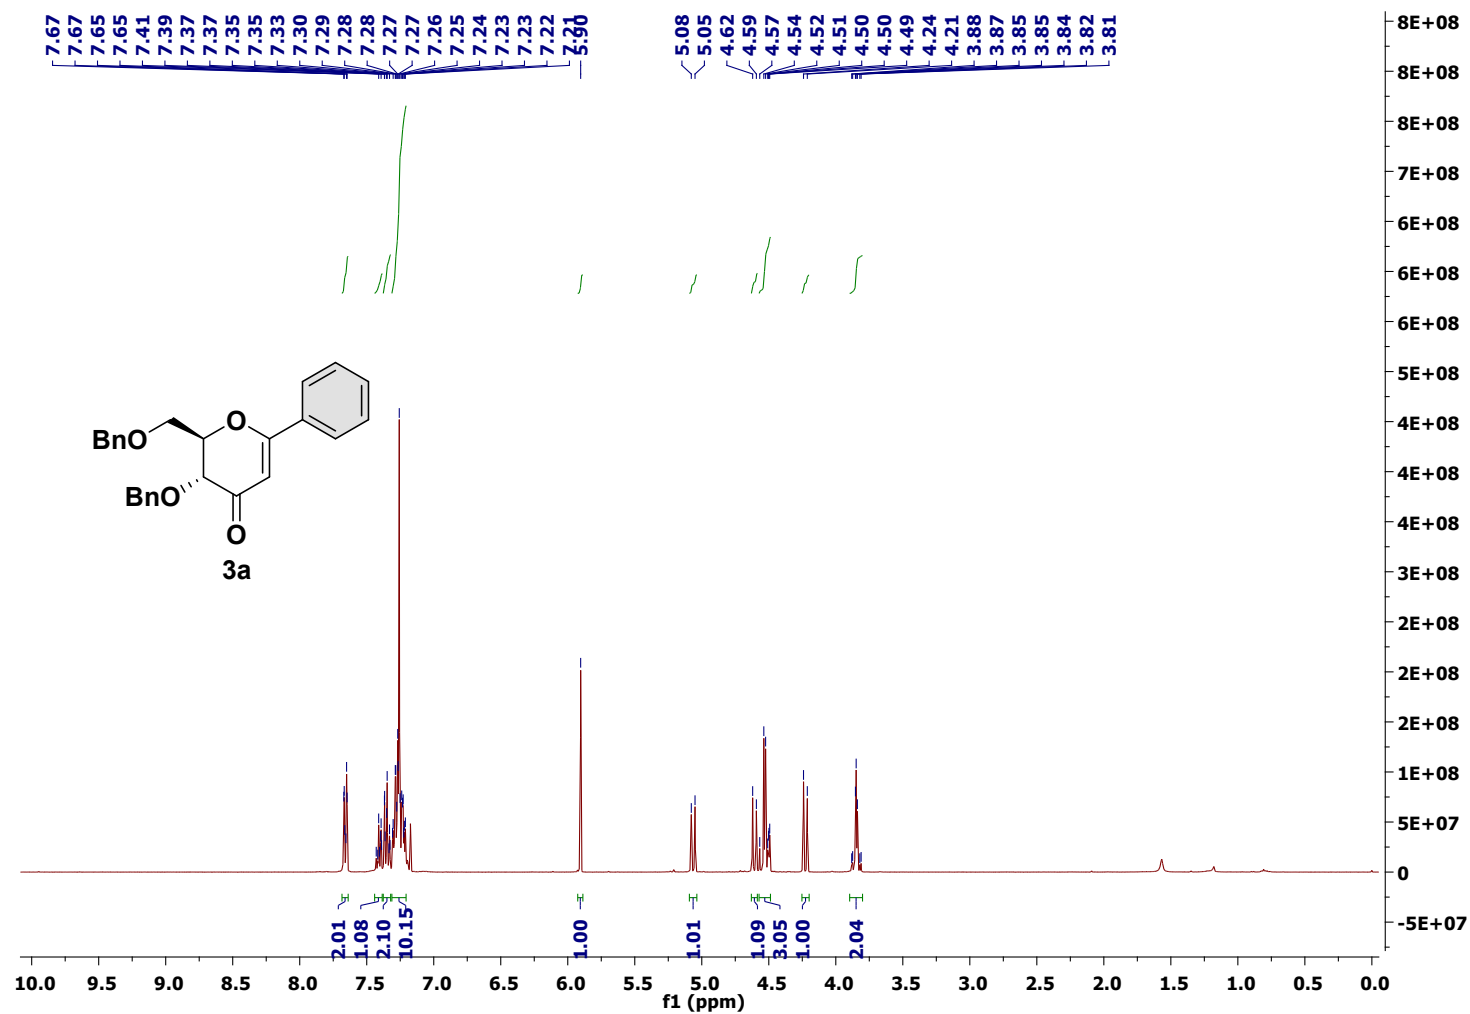

$^{13}\text{C}$  NMR  $\{^1\text{H}\}$  (101 MHz) of **3a** in  $\text{CDCl}_3$

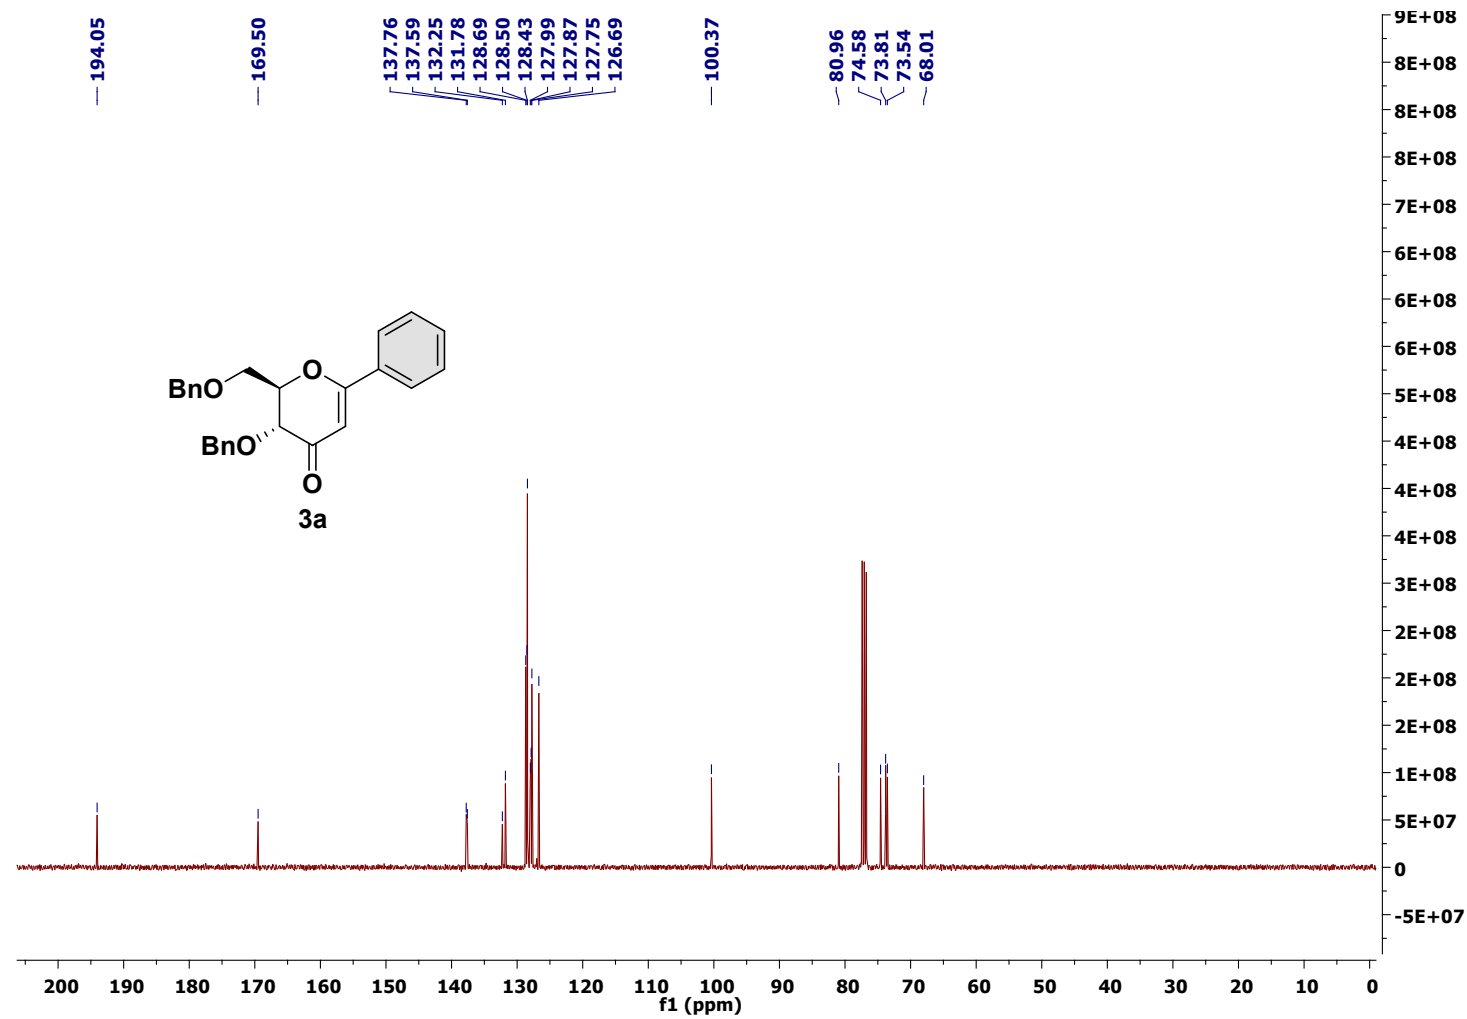

$^1\text{H}$  NMR (400 MHz) of **3b** in  $\text{CDCl}_3$

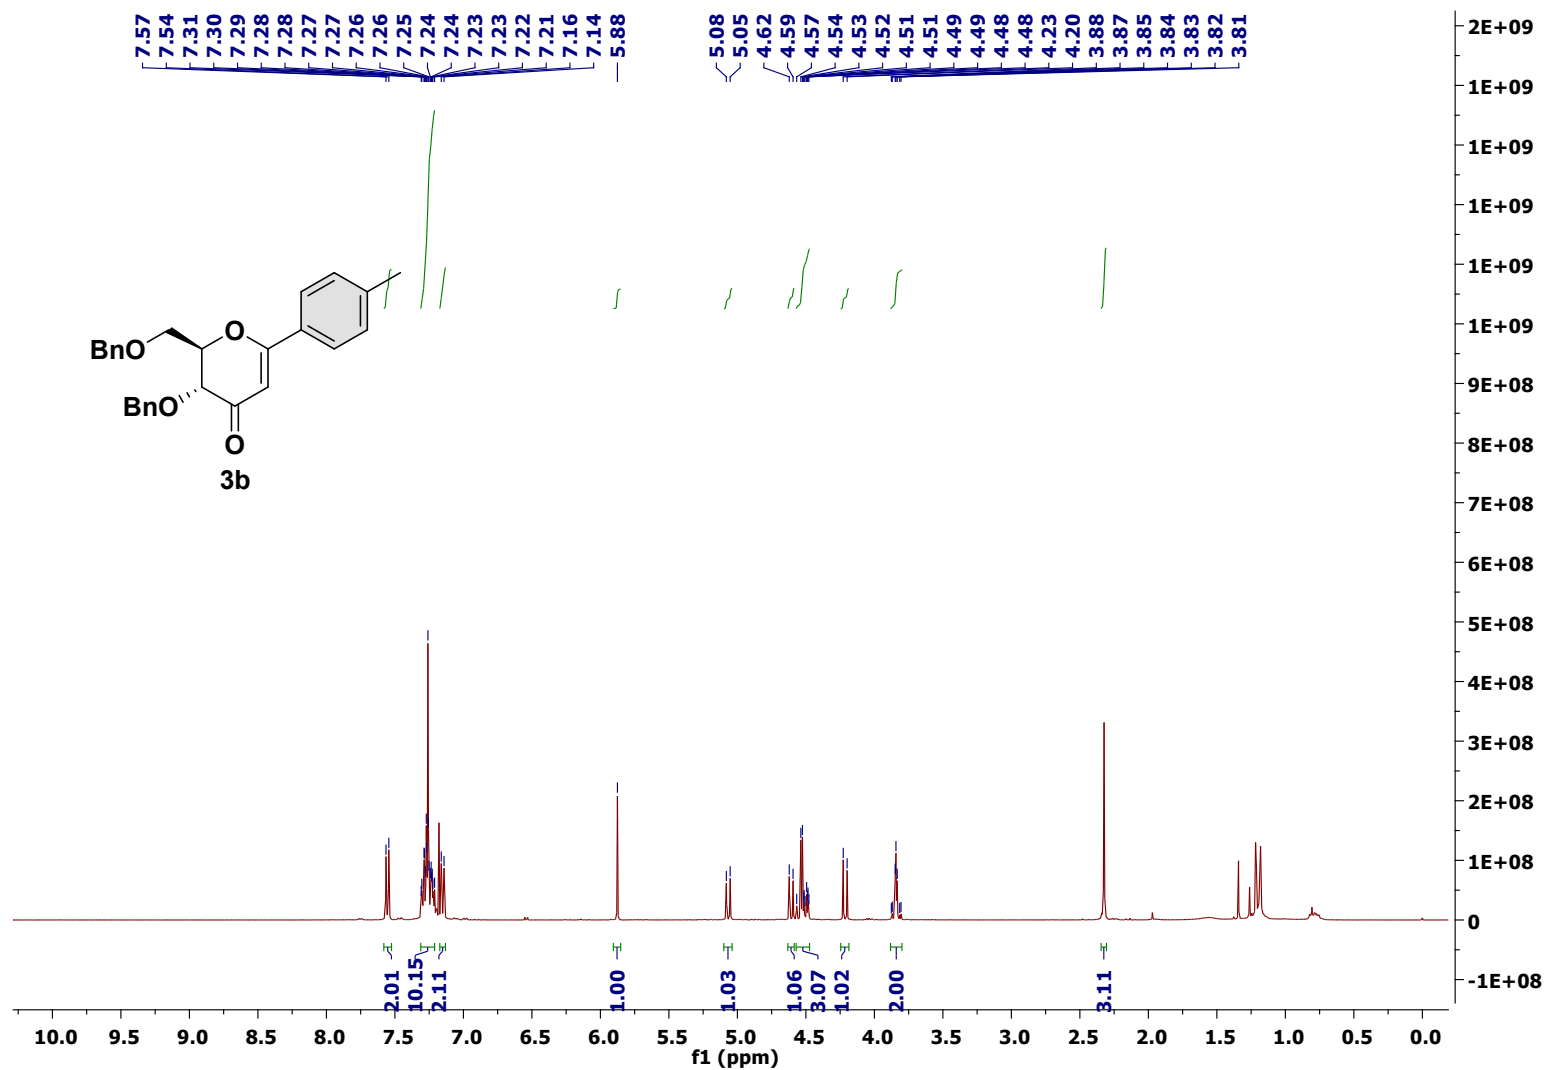

<sup>13</sup>C NMR {<sup>1</sup>H} (101 MHz) of **3b** in CDCl<sub>3</sub>

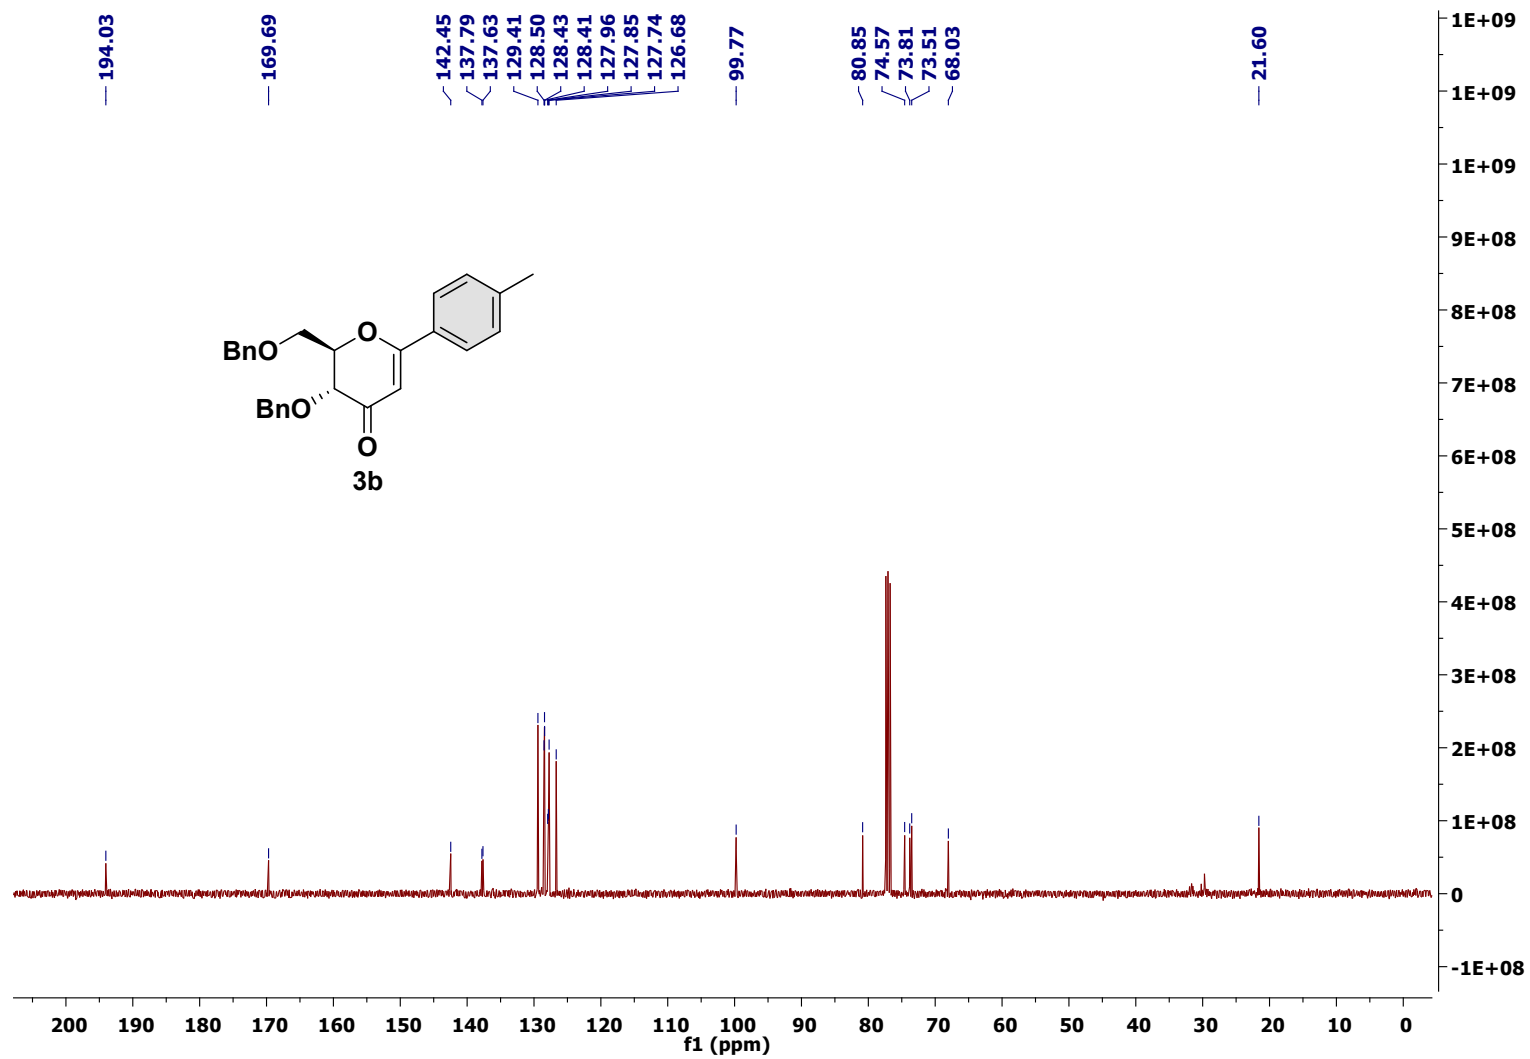

<sup>1</sup>H NMR (400 MHz) of **3c** in CDCl<sub>3</sub>



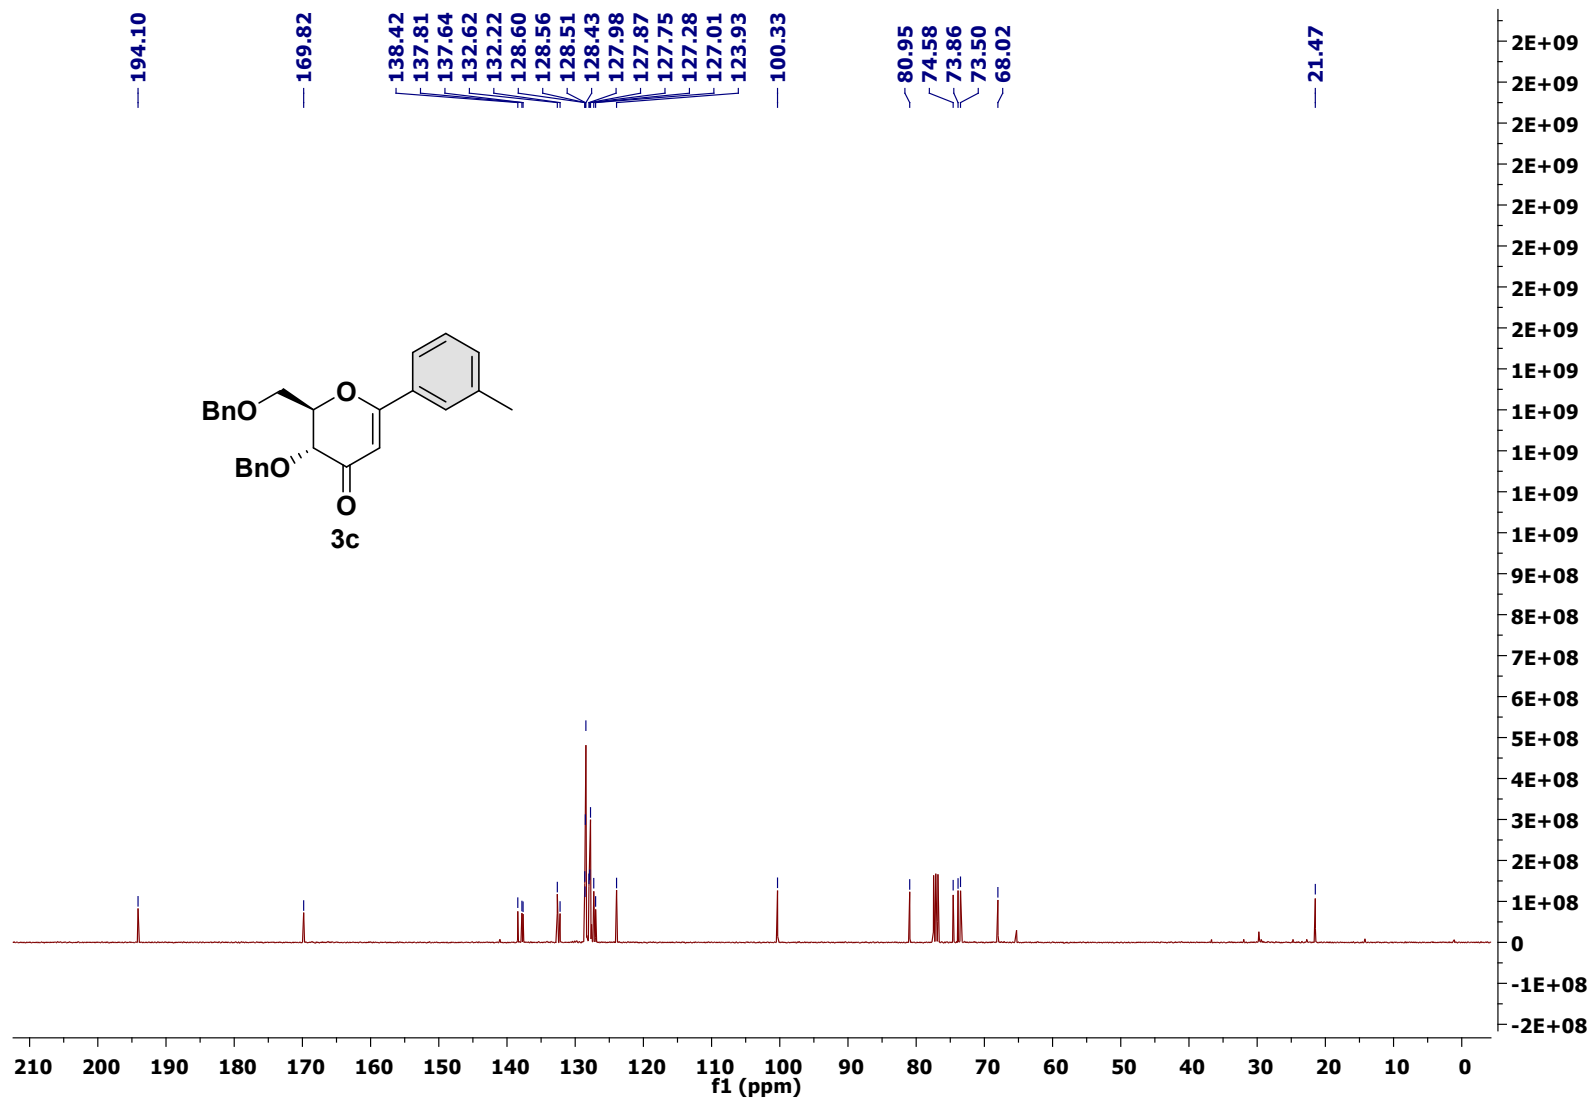

<sup>1</sup>H NMR (400 MHz) of **3d** in CDCl<sub>3</sub>



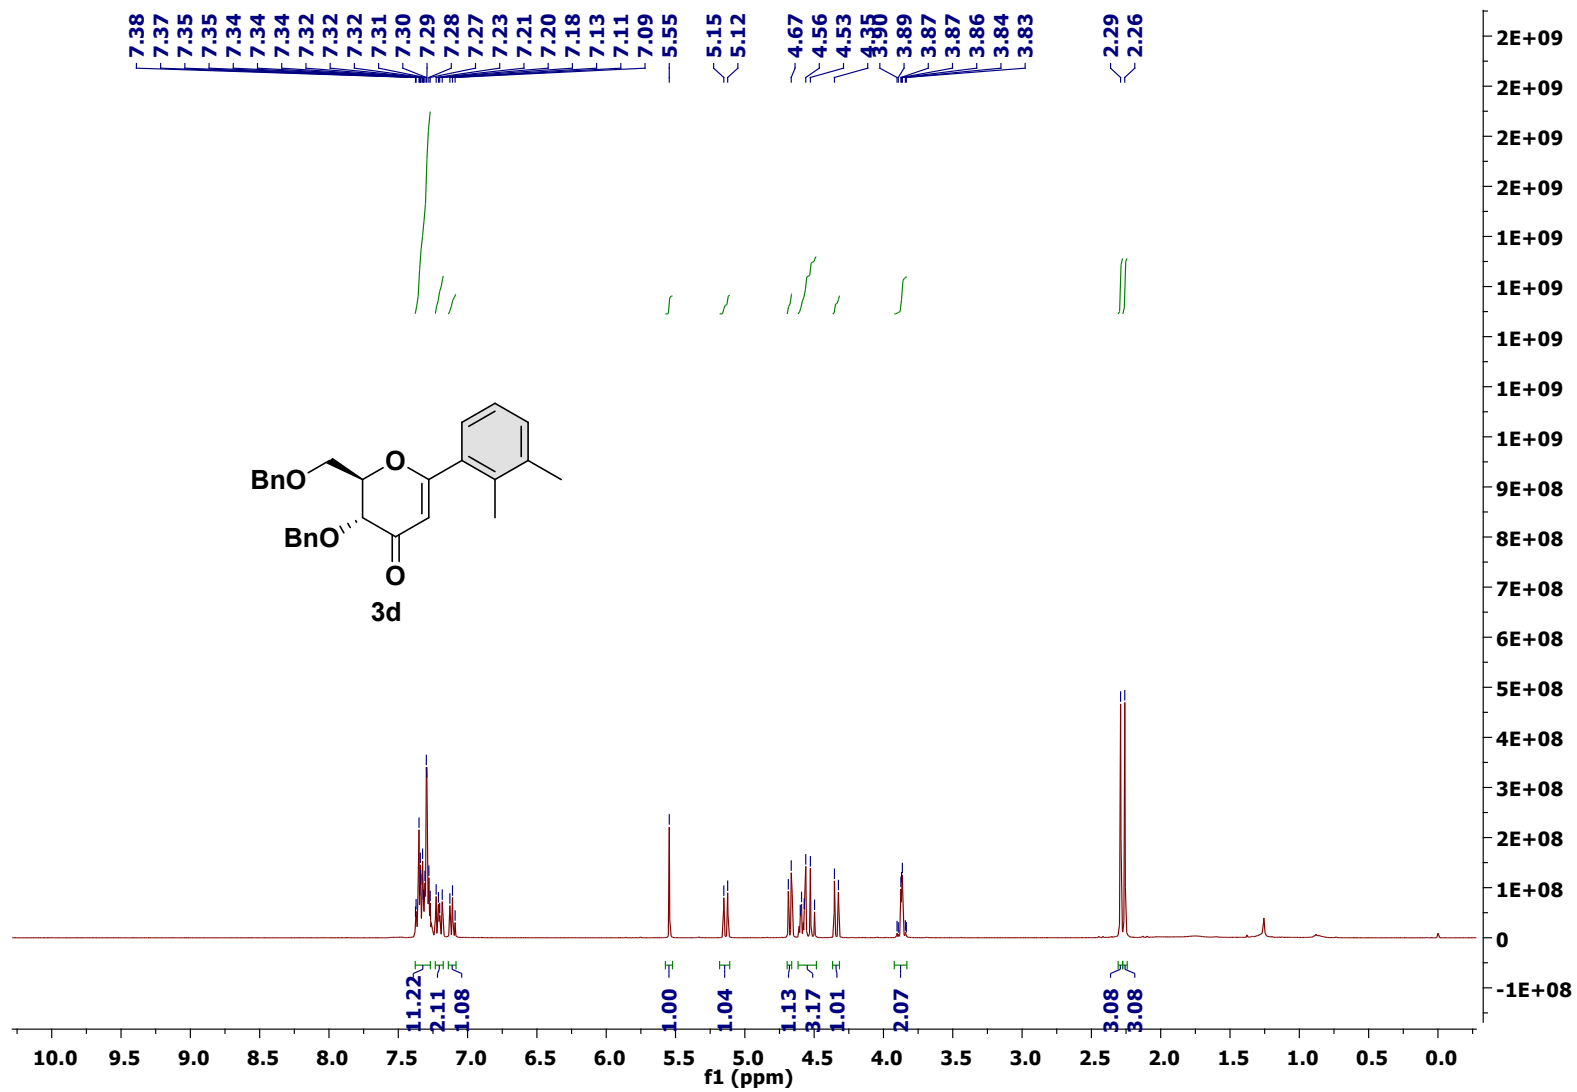

$^{13}\text{C}$  NMR  $\{^1\text{H}\}$  (101 MHz) of **3d** in  $\text{CDCl}_3$

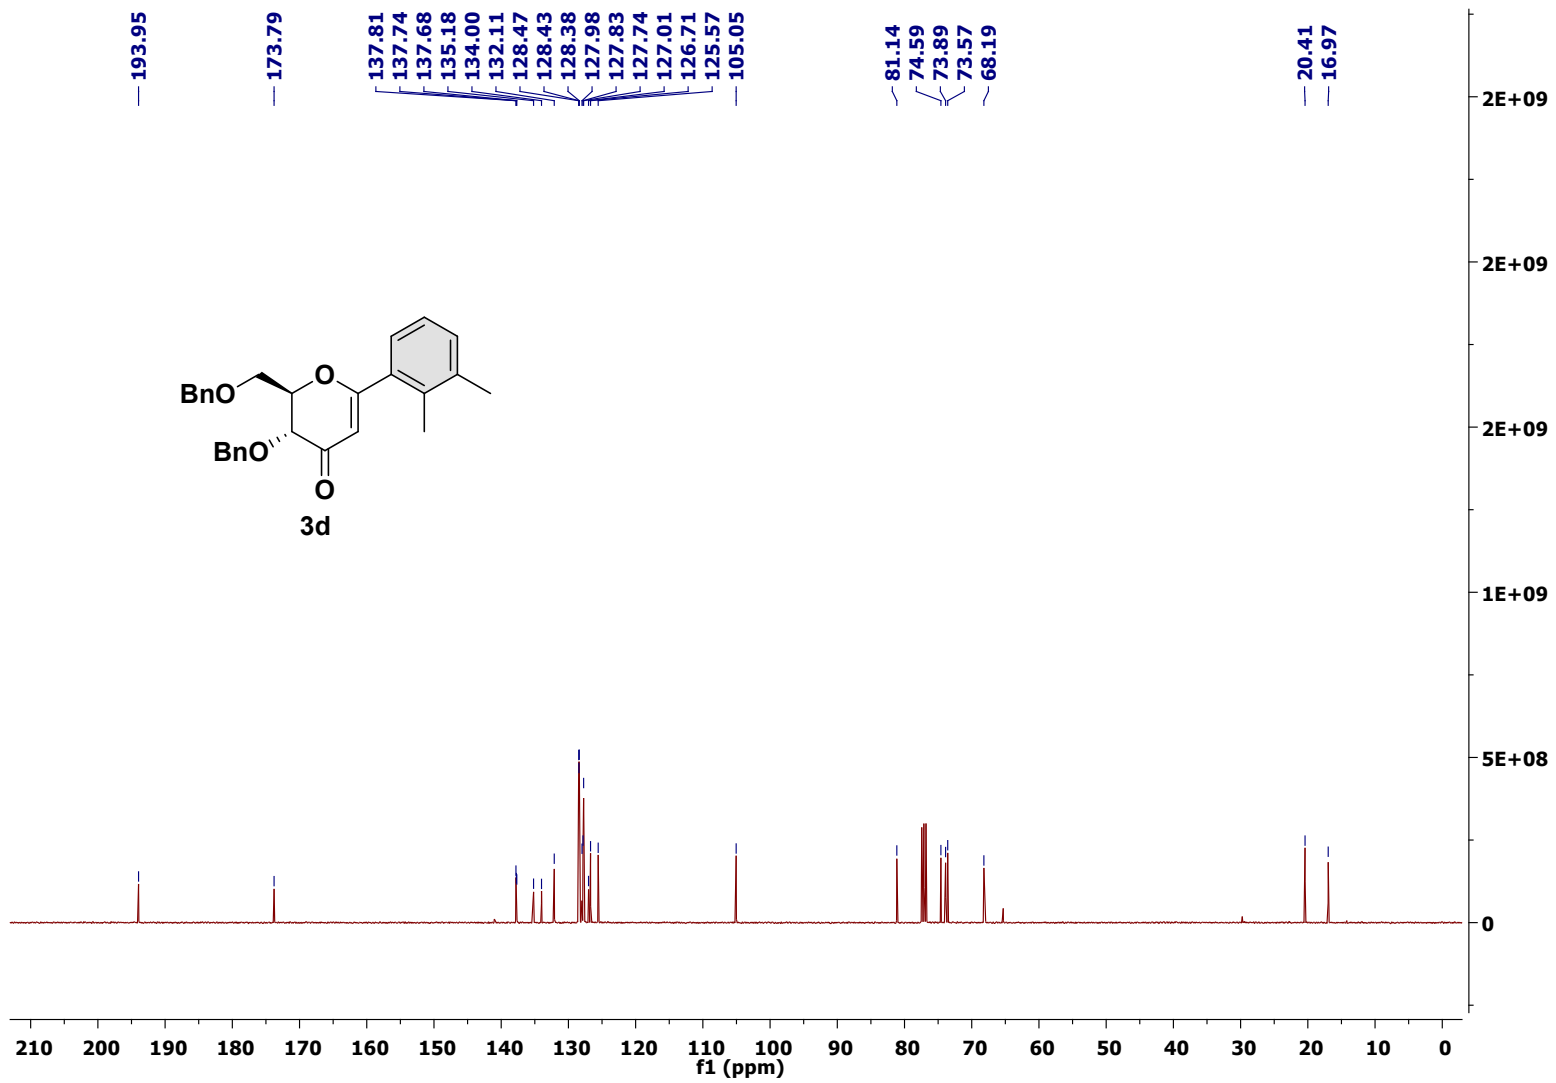

<sup>1</sup>H NMR (400 MHz) of **3e** in CDCl<sub>3</sub>

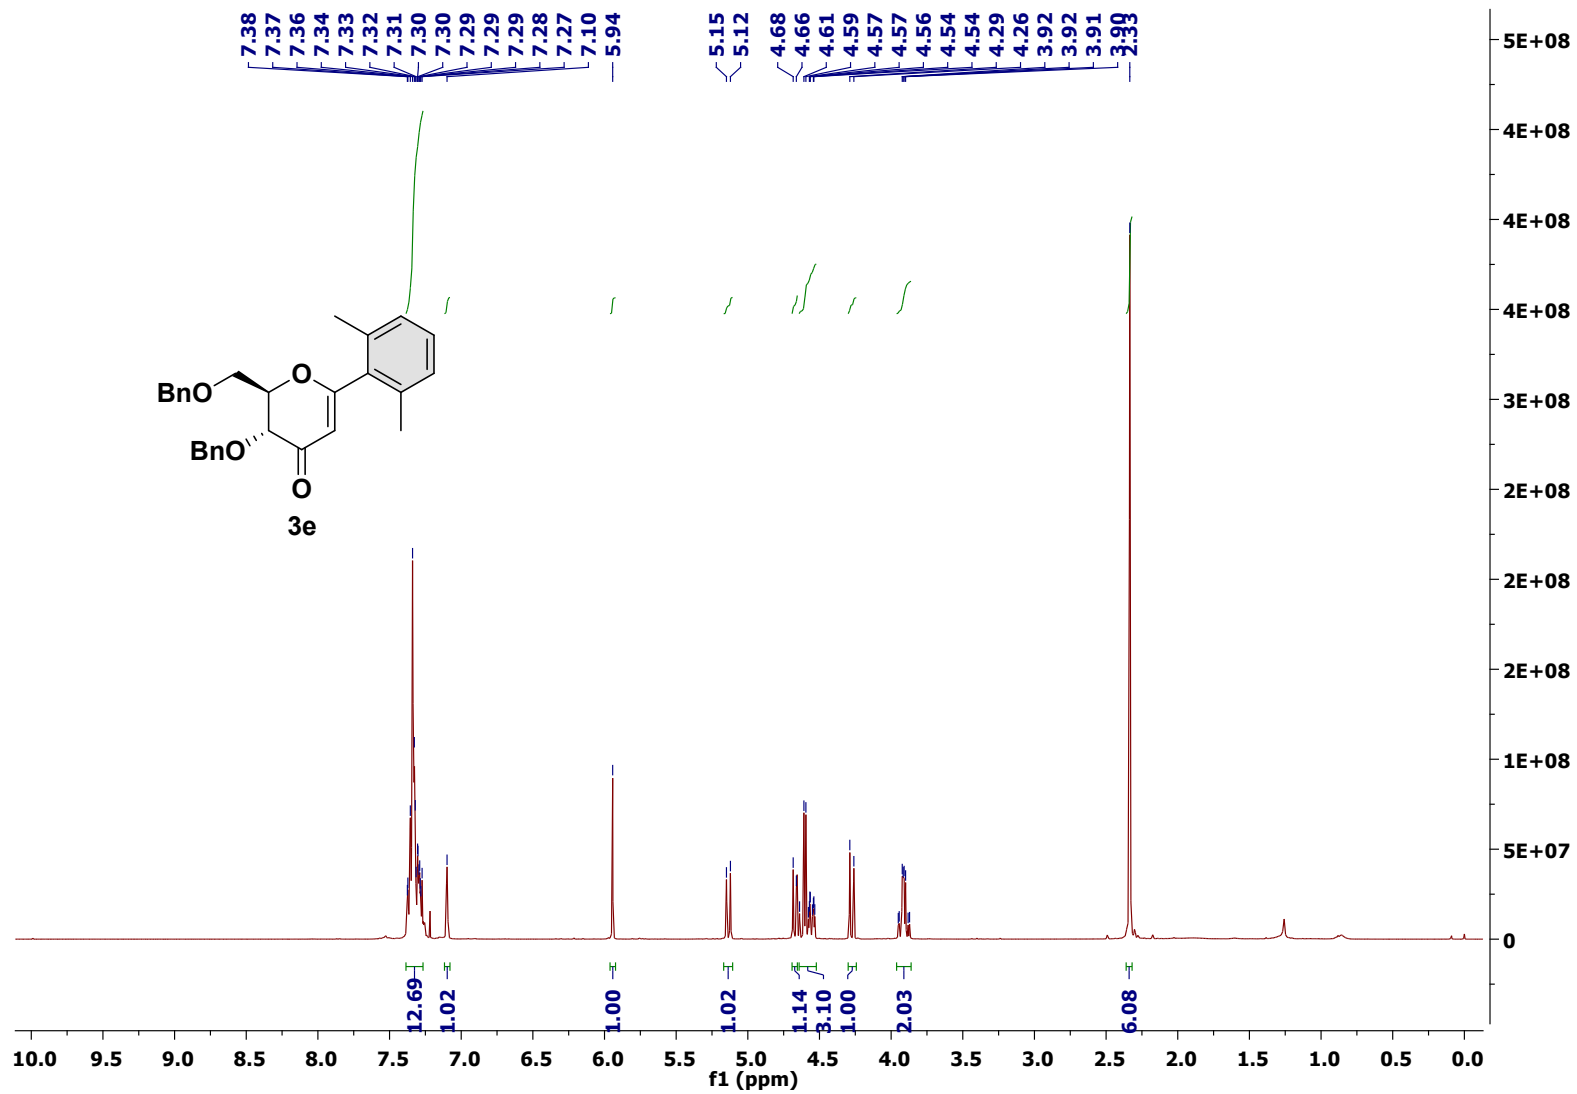

<sup>13</sup>C NMR {<sup>1</sup>H} (101 MHz) of **3e** in CDCl<sub>3</sub>

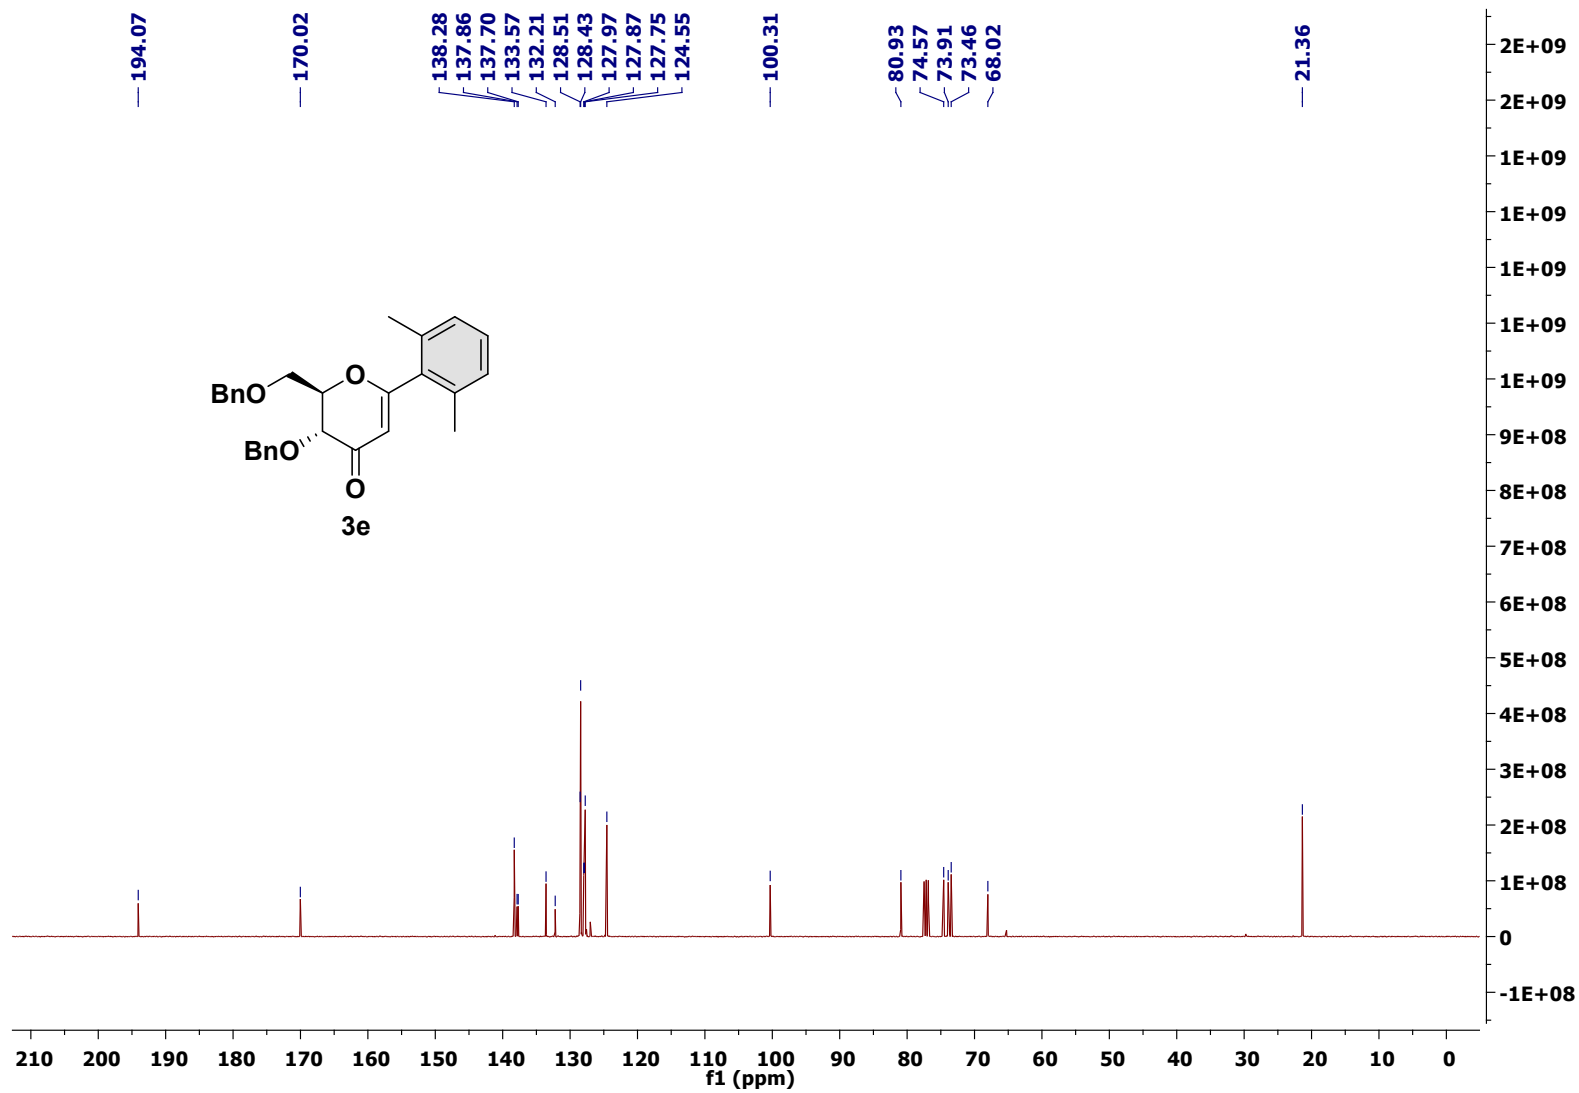

<sup>1</sup>H NMR (400 MHz) of **3f** in CDCl<sub>3</sub>

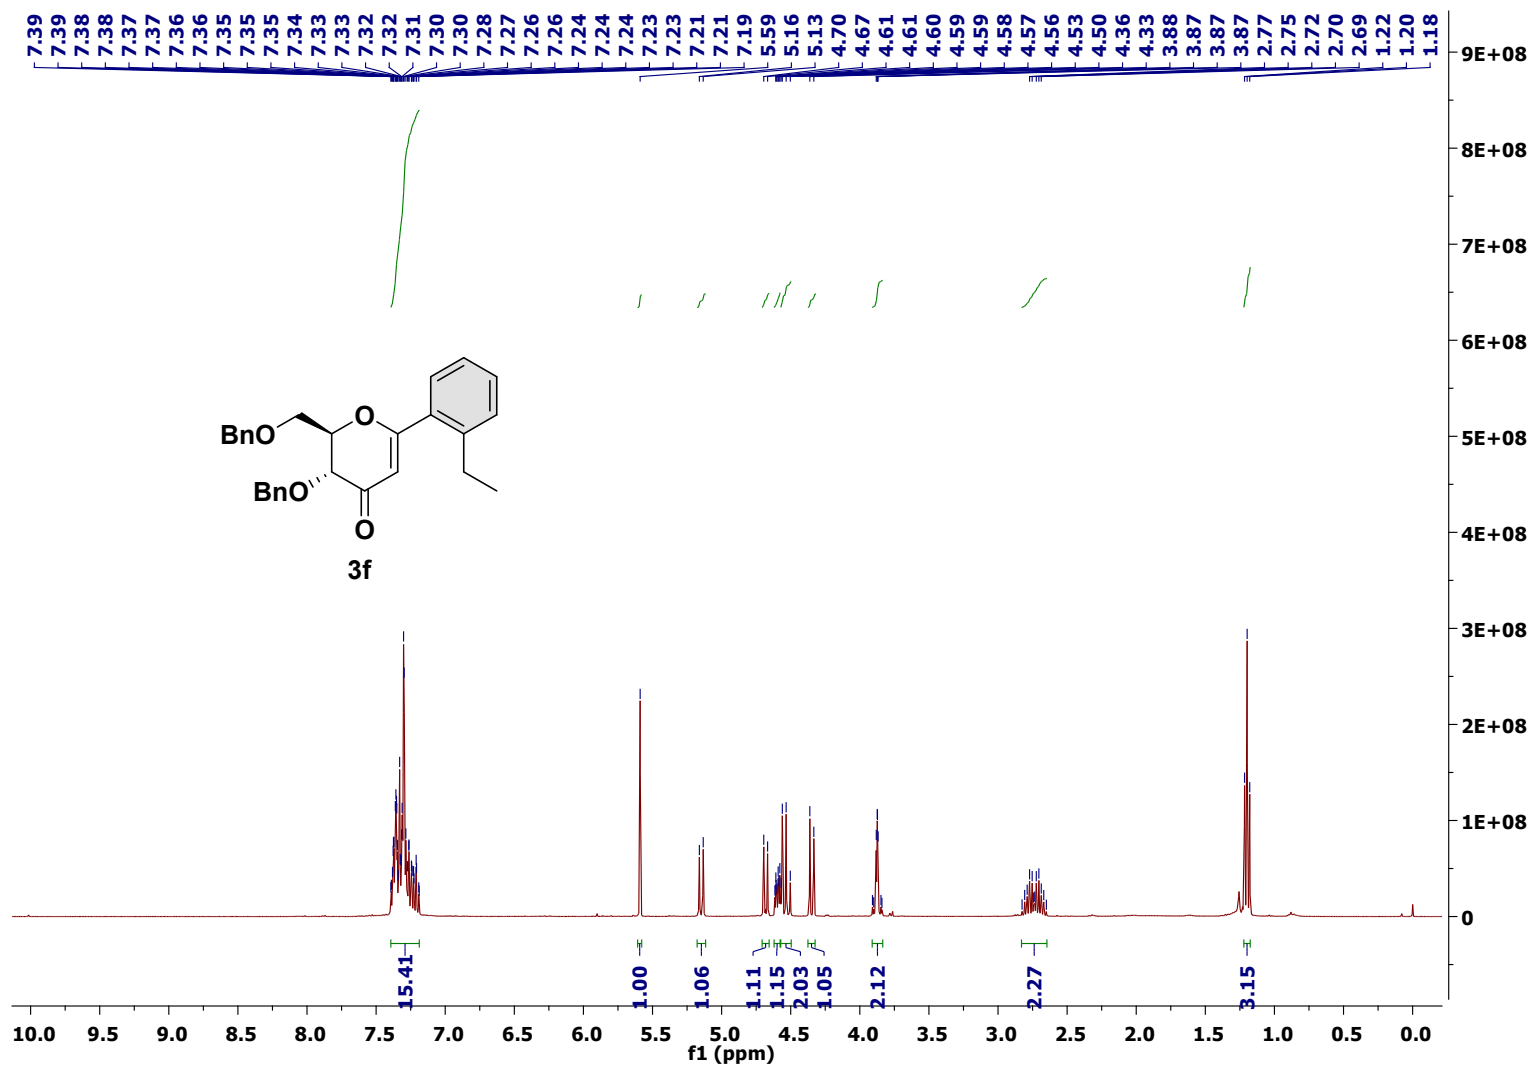

<sup>13</sup>C NMR {<sup>1</sup>H} (101 MHz) of **3f** in CDCl<sub>3</sub>

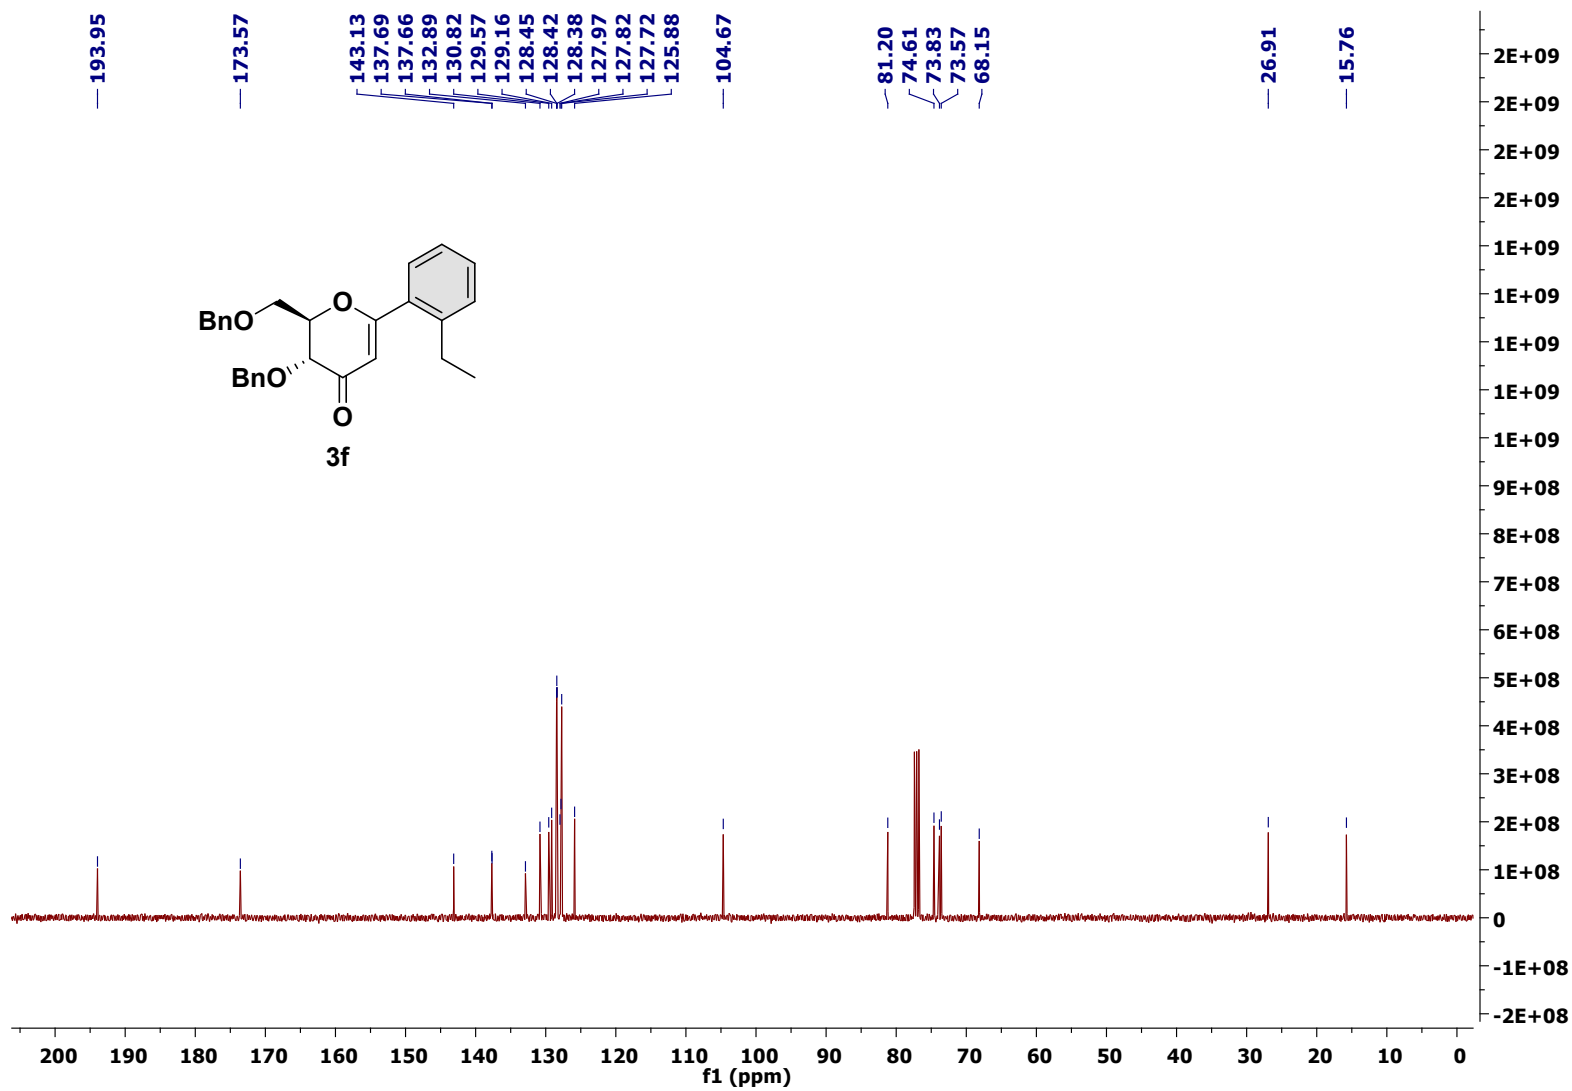

<sup>1</sup>H NMR (400 MHz) of **3g** in CDCl<sub>3</sub>

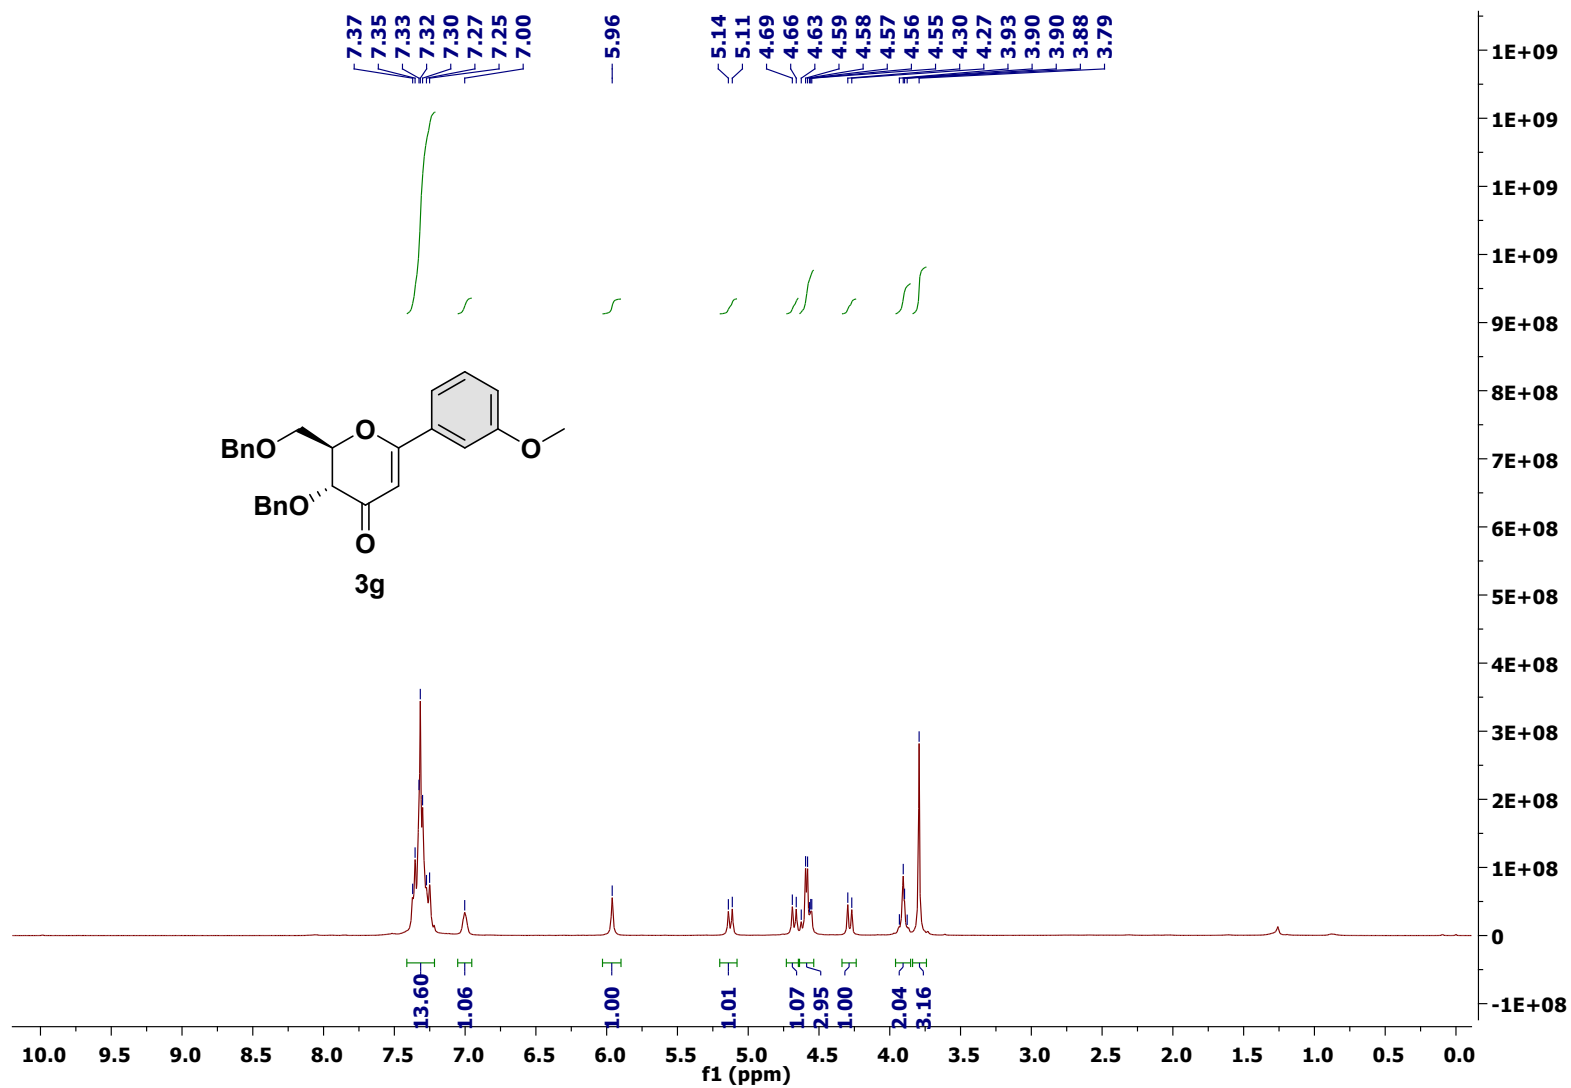

<sup>13</sup>C NMR {<sup>1</sup>H} (101 MHz) of **3g** in CDCl<sub>3</sub>

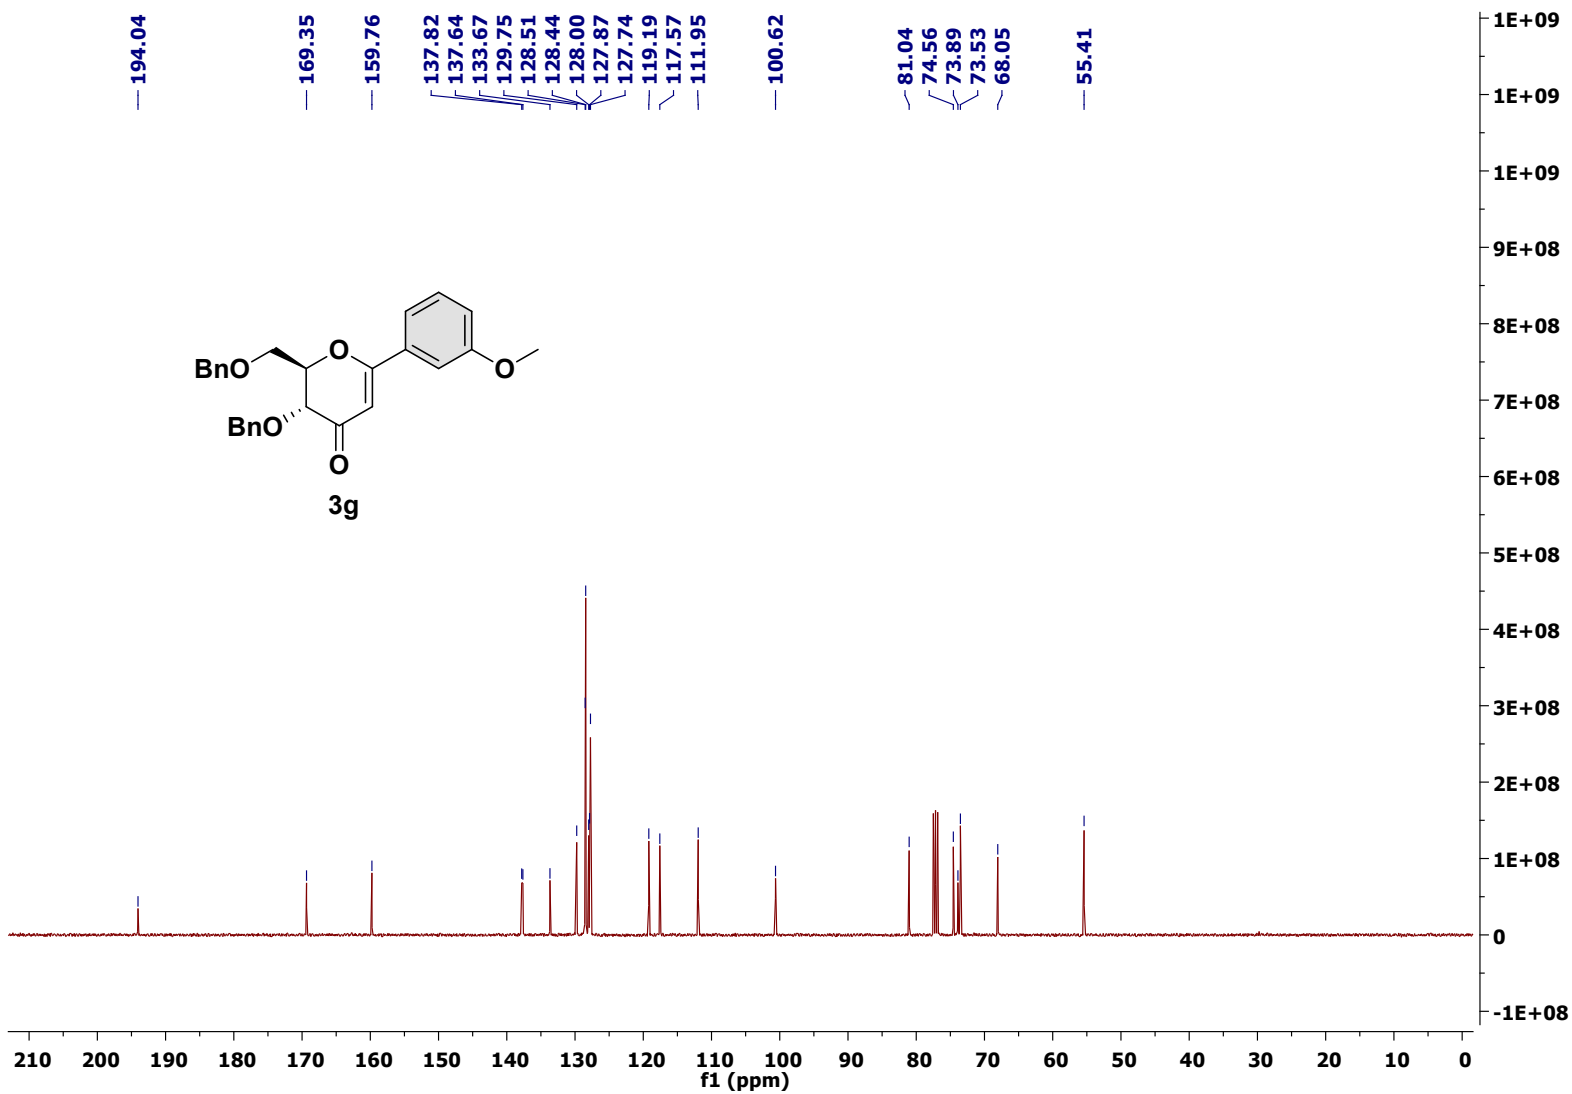

<sup>1</sup>H NMR (400 MHz) of **3h** in CDCl<sub>3</sub>



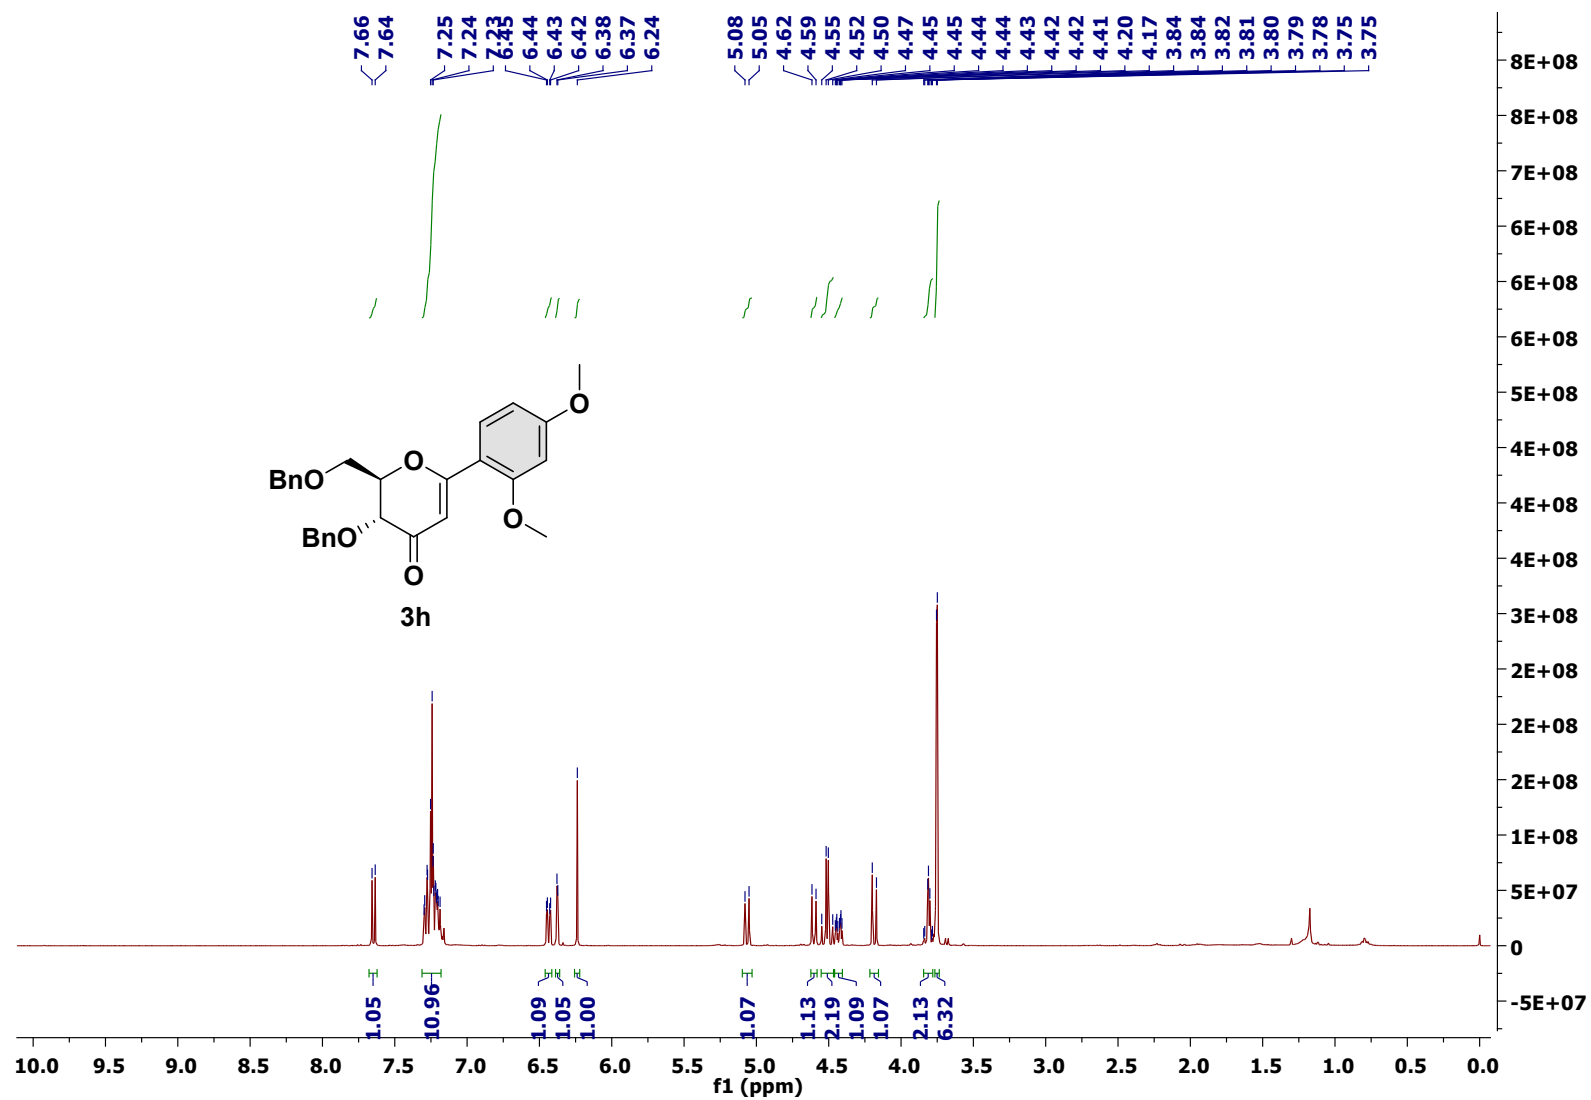

$^{13}\text{C}$  NMR  $\{^1\text{H}\}$  (101 MHz) of **3h** in  $\text{CDCl}_3$

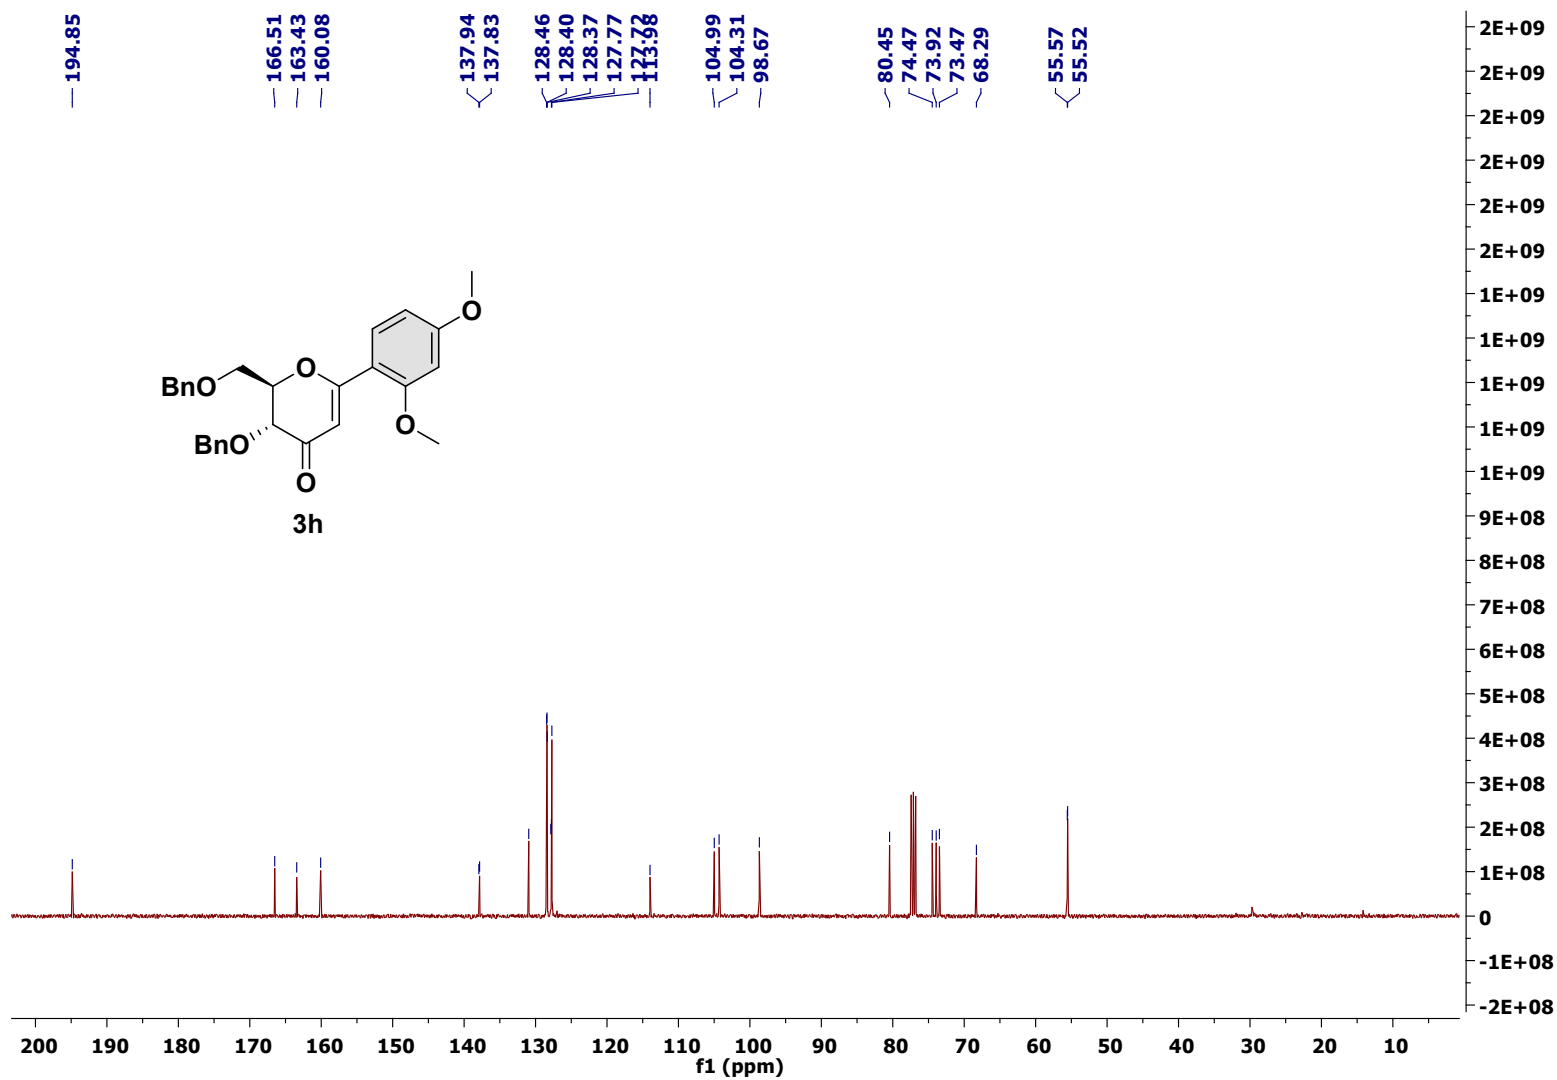

<sup>1</sup>H NMR (400 MHz) of **3i** in CDCl<sub>3</sub>

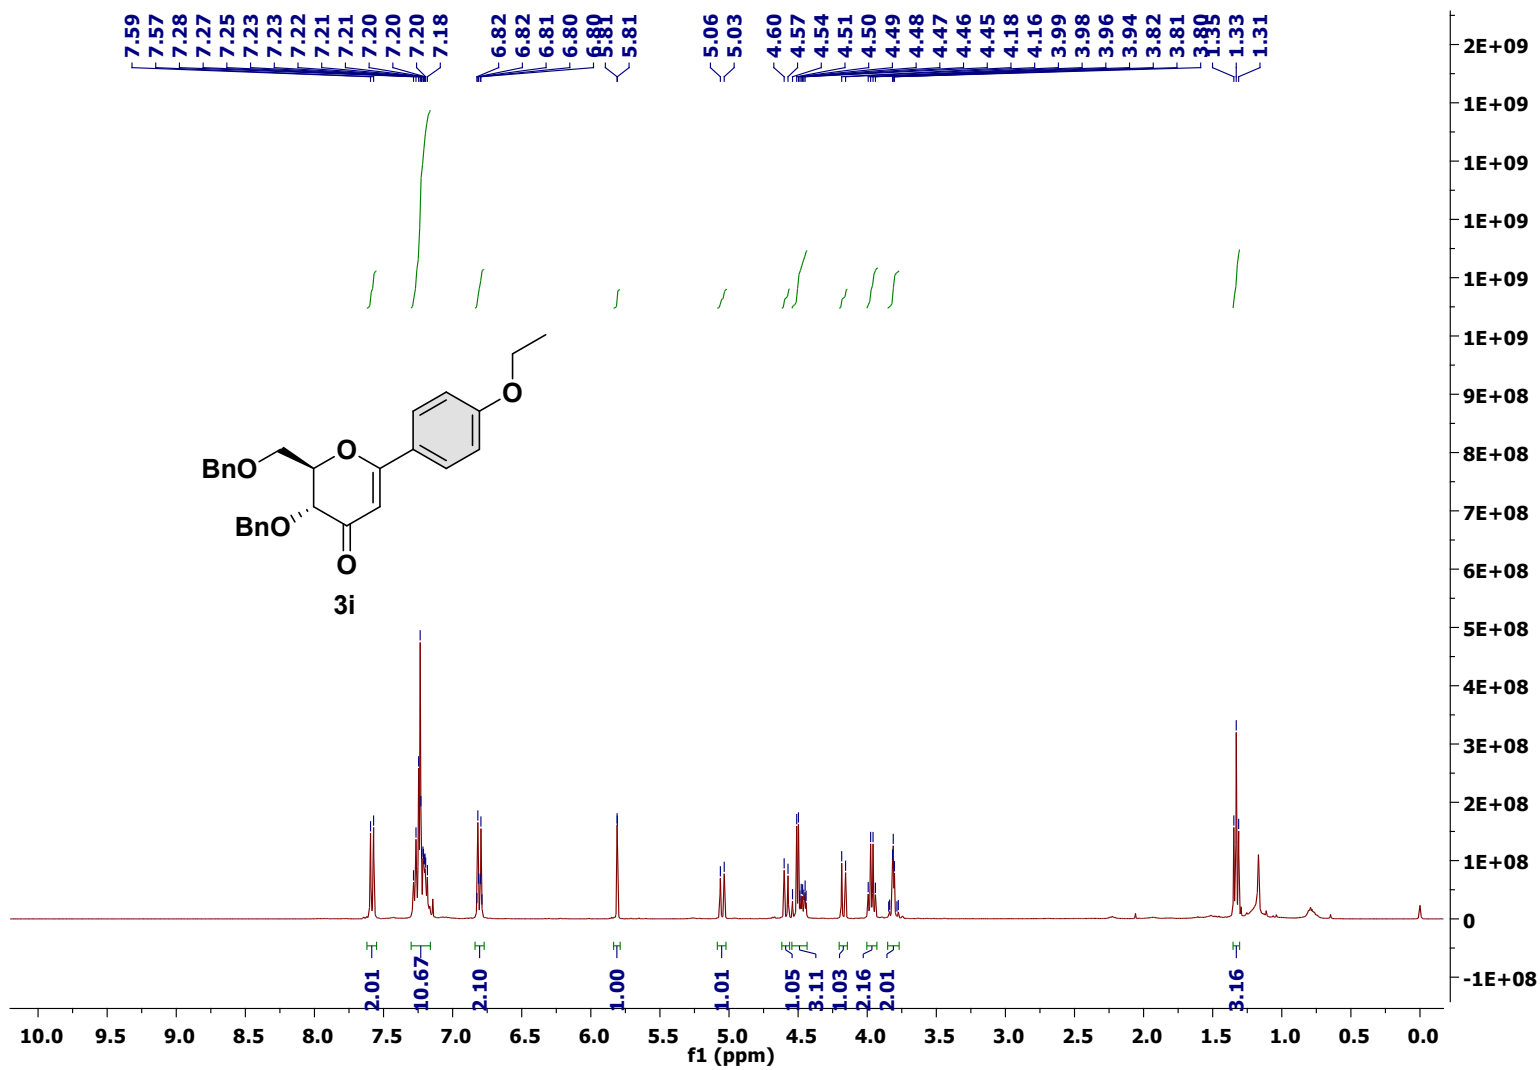

<sup>13</sup>C NMR {<sup>1</sup>H} (101 MHz) of **3i** in CDCl<sub>3</sub>

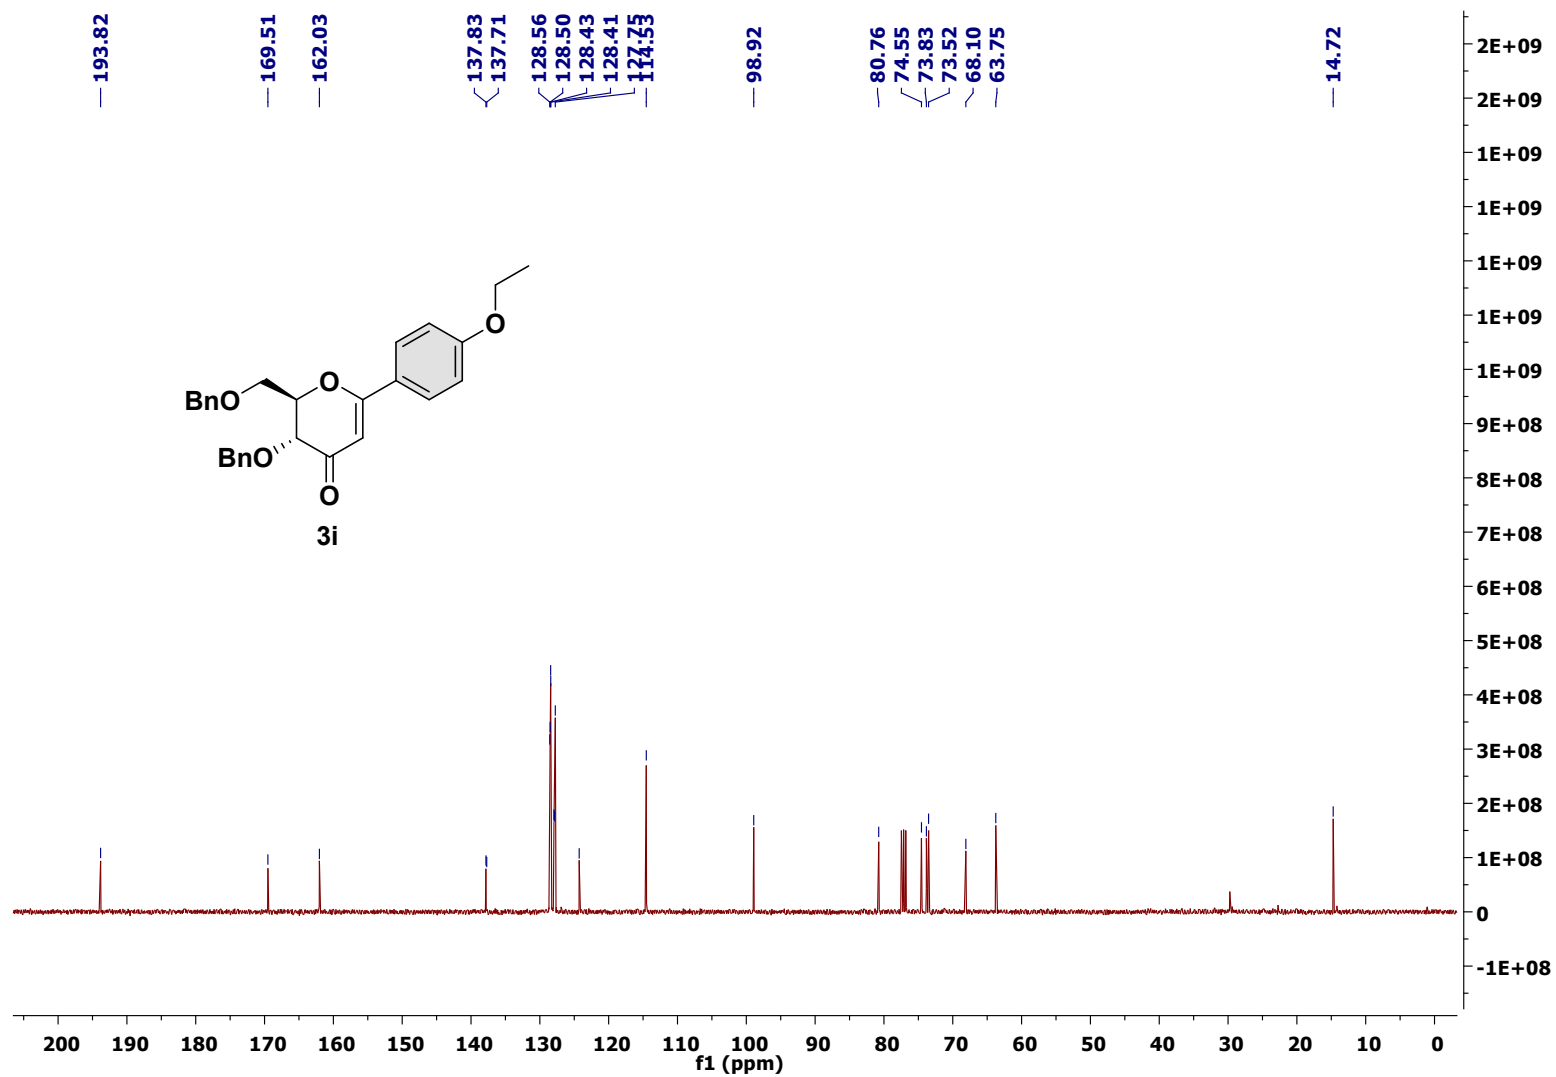

$^{13}\text{C}$  NMR (400 MHz) of **3j** in  $\text{CDCl}_3$

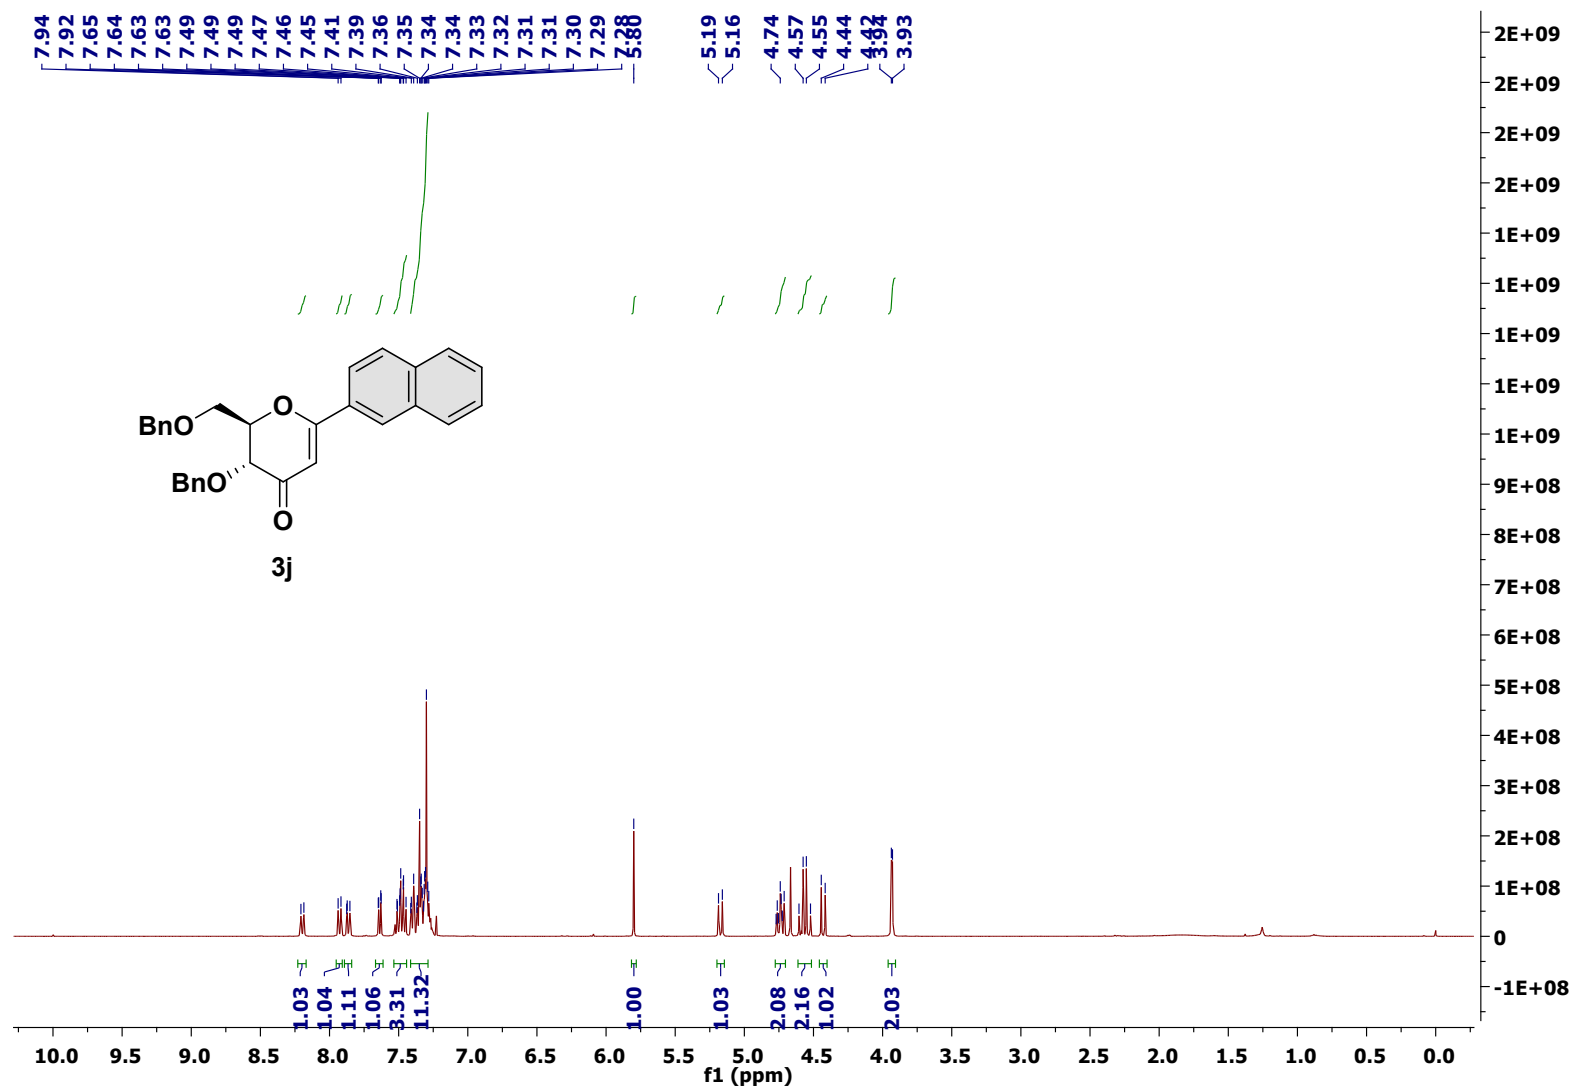

$^{13}\text{C}$  NMR  $\{^1\text{H}\}$  (101 MHz) of **3j** in  $\text{CDCl}_3$

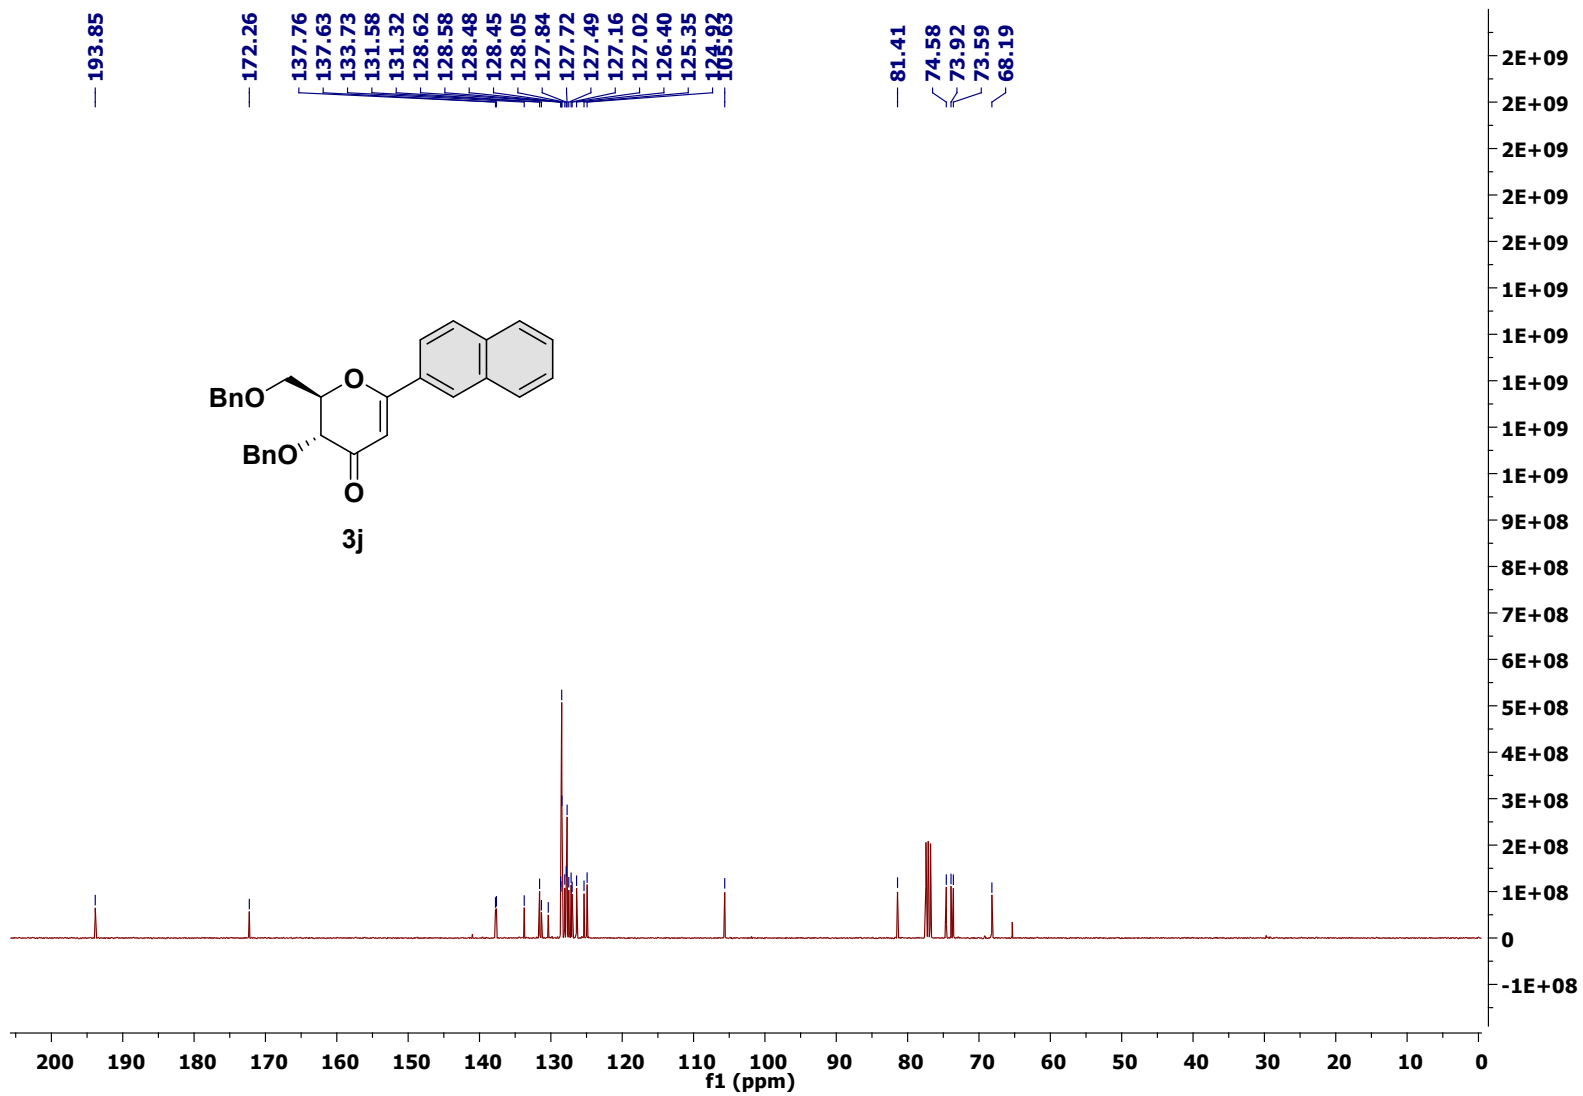

<sup>1</sup>H NMR (400 MHz) of **3k** in CDCl<sub>3</sub>

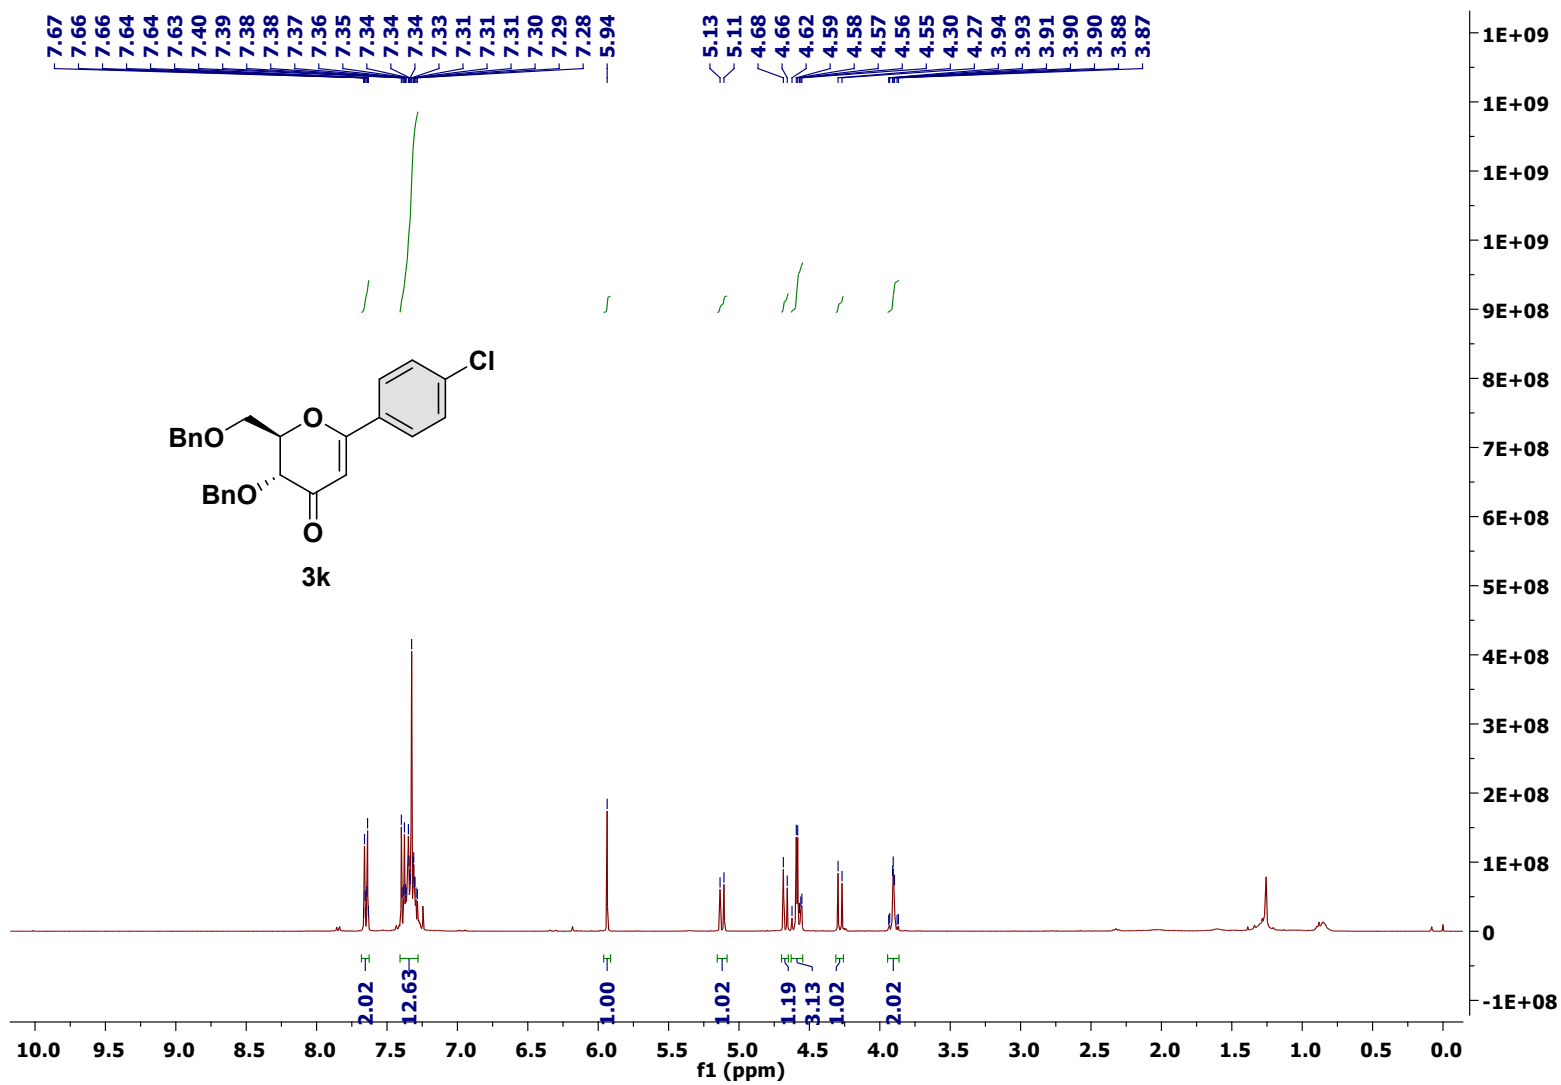

<sup>13</sup>C NMR {<sup>1</sup>H} (101 MHz) of **3k** in CDCl<sub>3</sub>

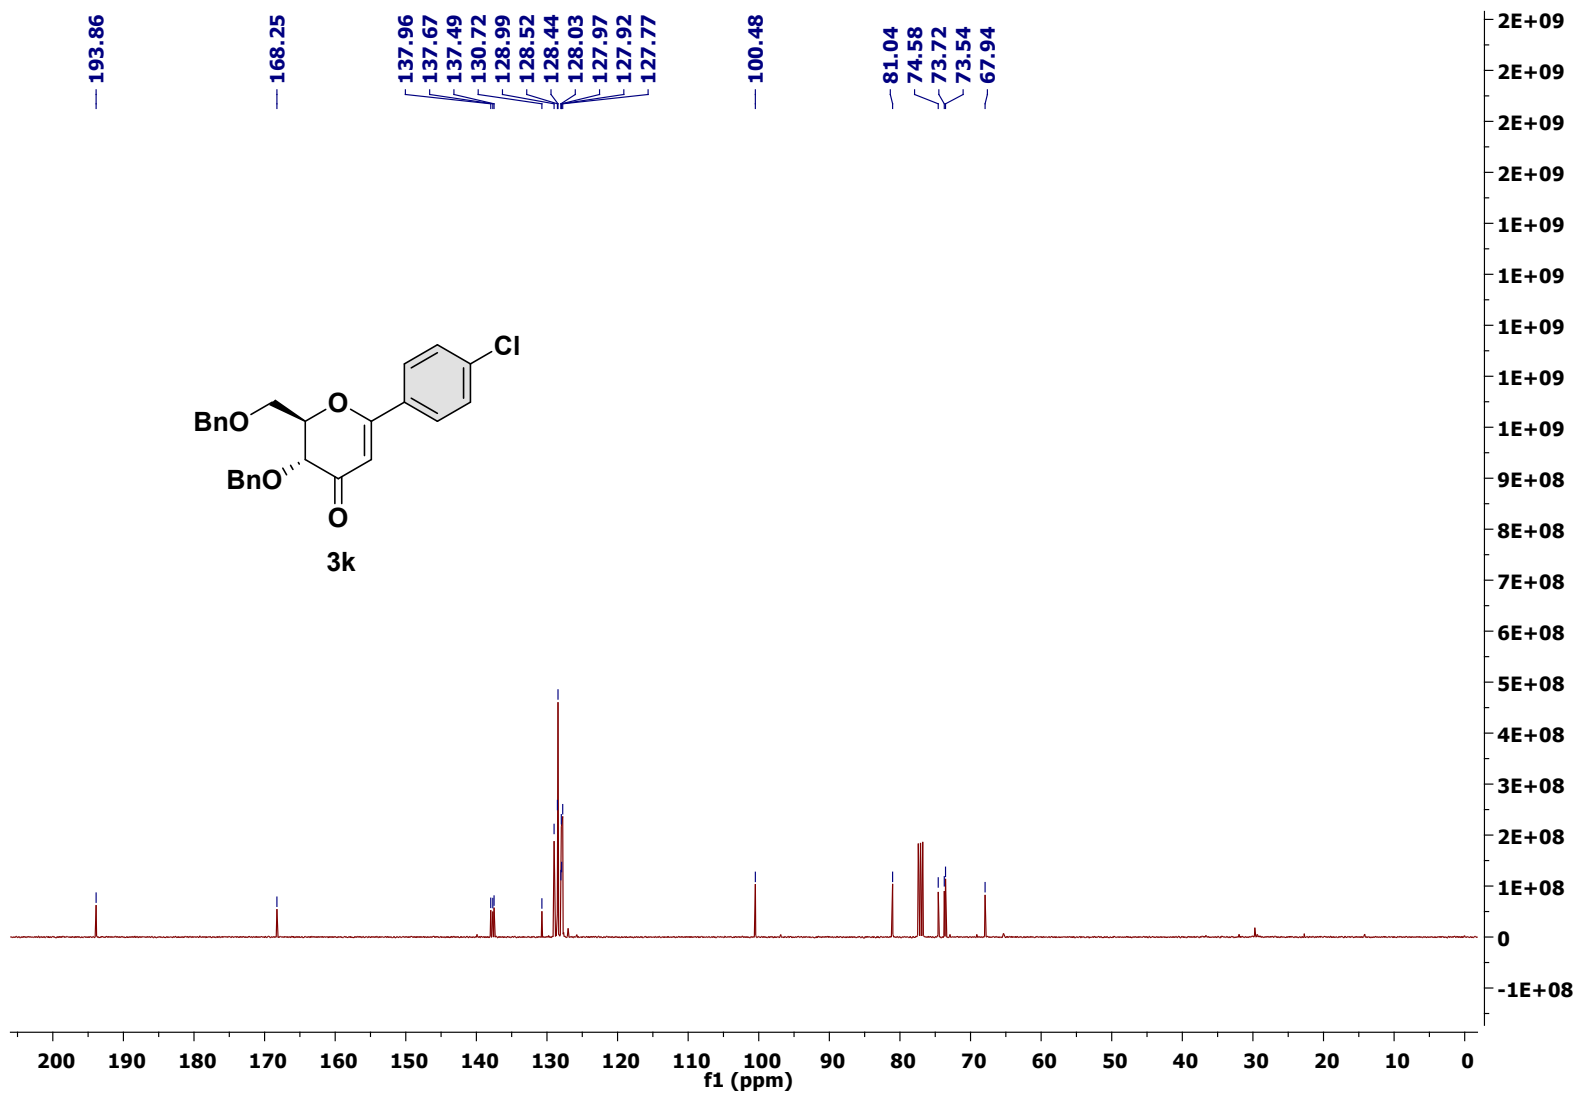

<sup>1</sup>H NMR (400 MHz) of **3l** in CDCl<sub>3</sub>



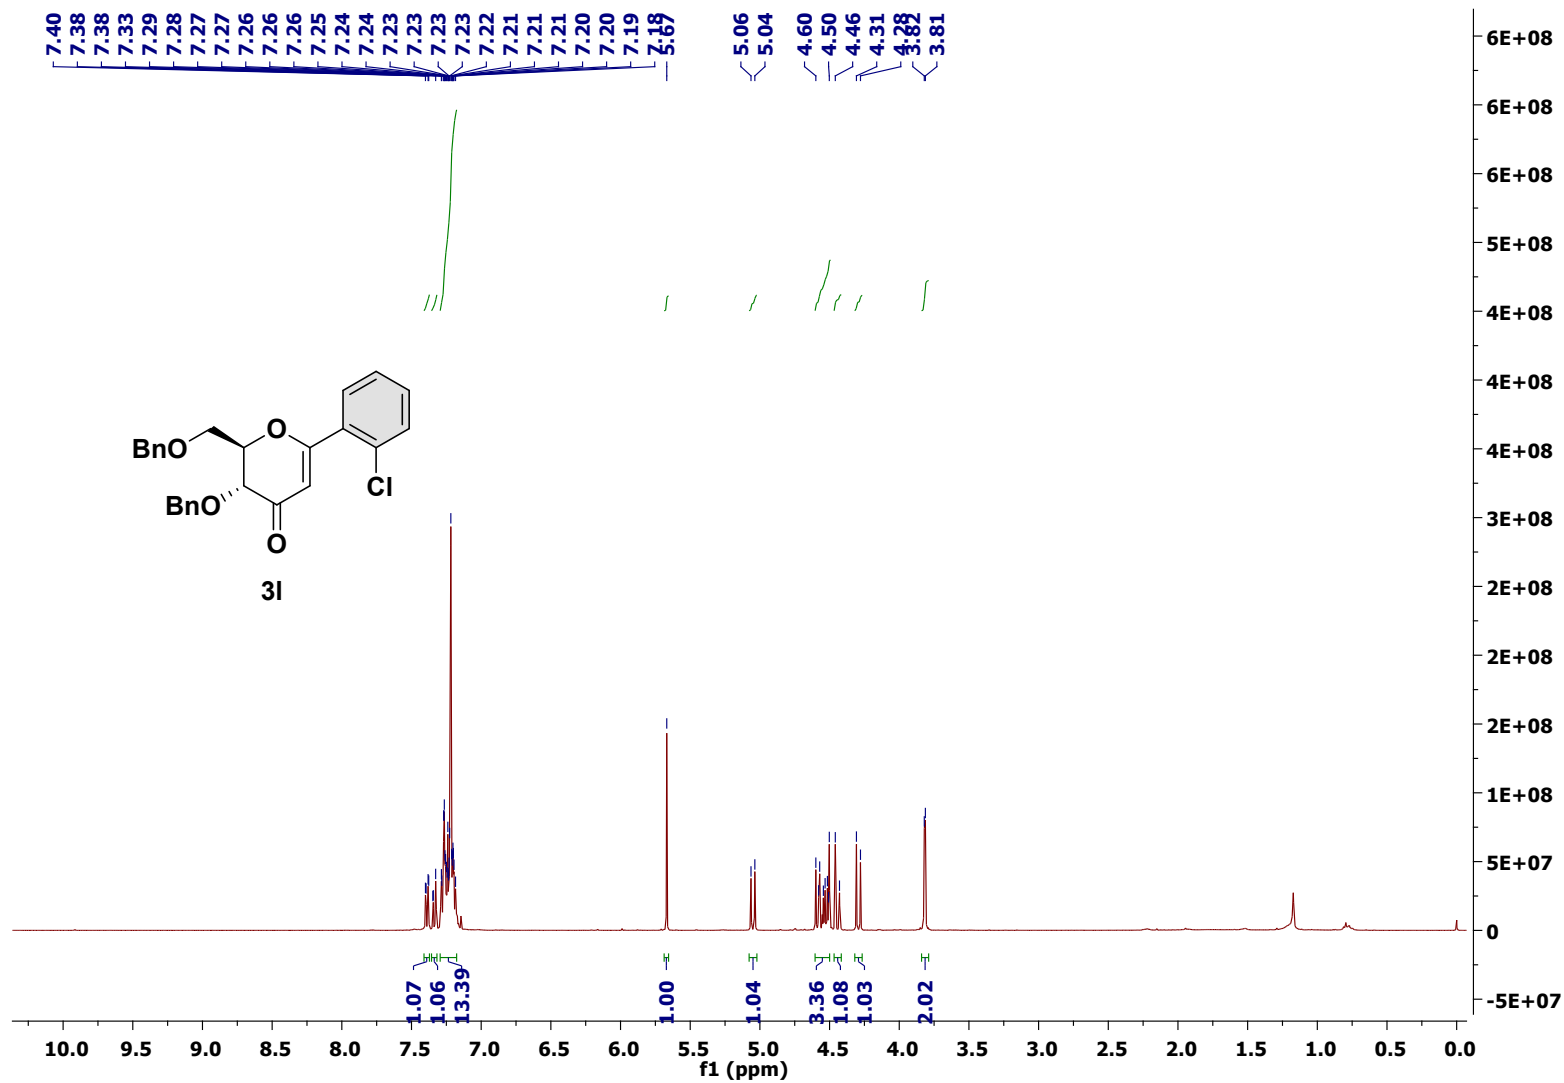

$^1\text{H}$  NMR (101 MHz) of **3I** in  $\text{CDCl}_3$

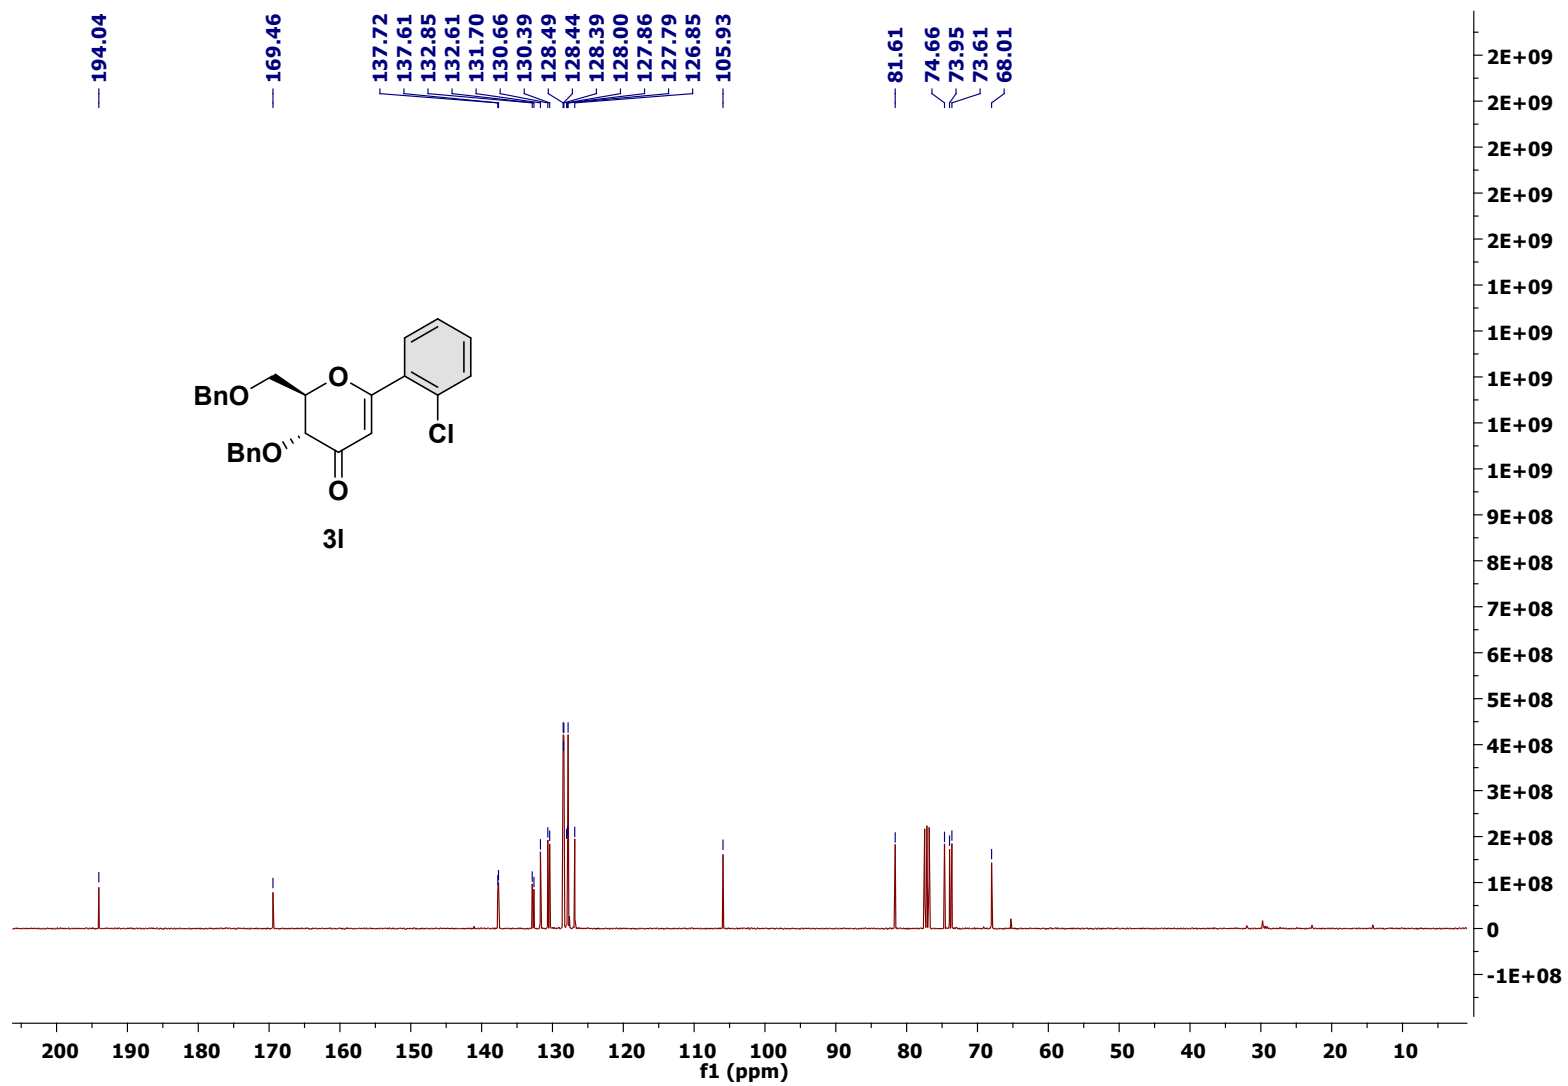

<sup>1</sup>H NMR (400 MHz) of **3m** in CDCl<sub>3</sub>

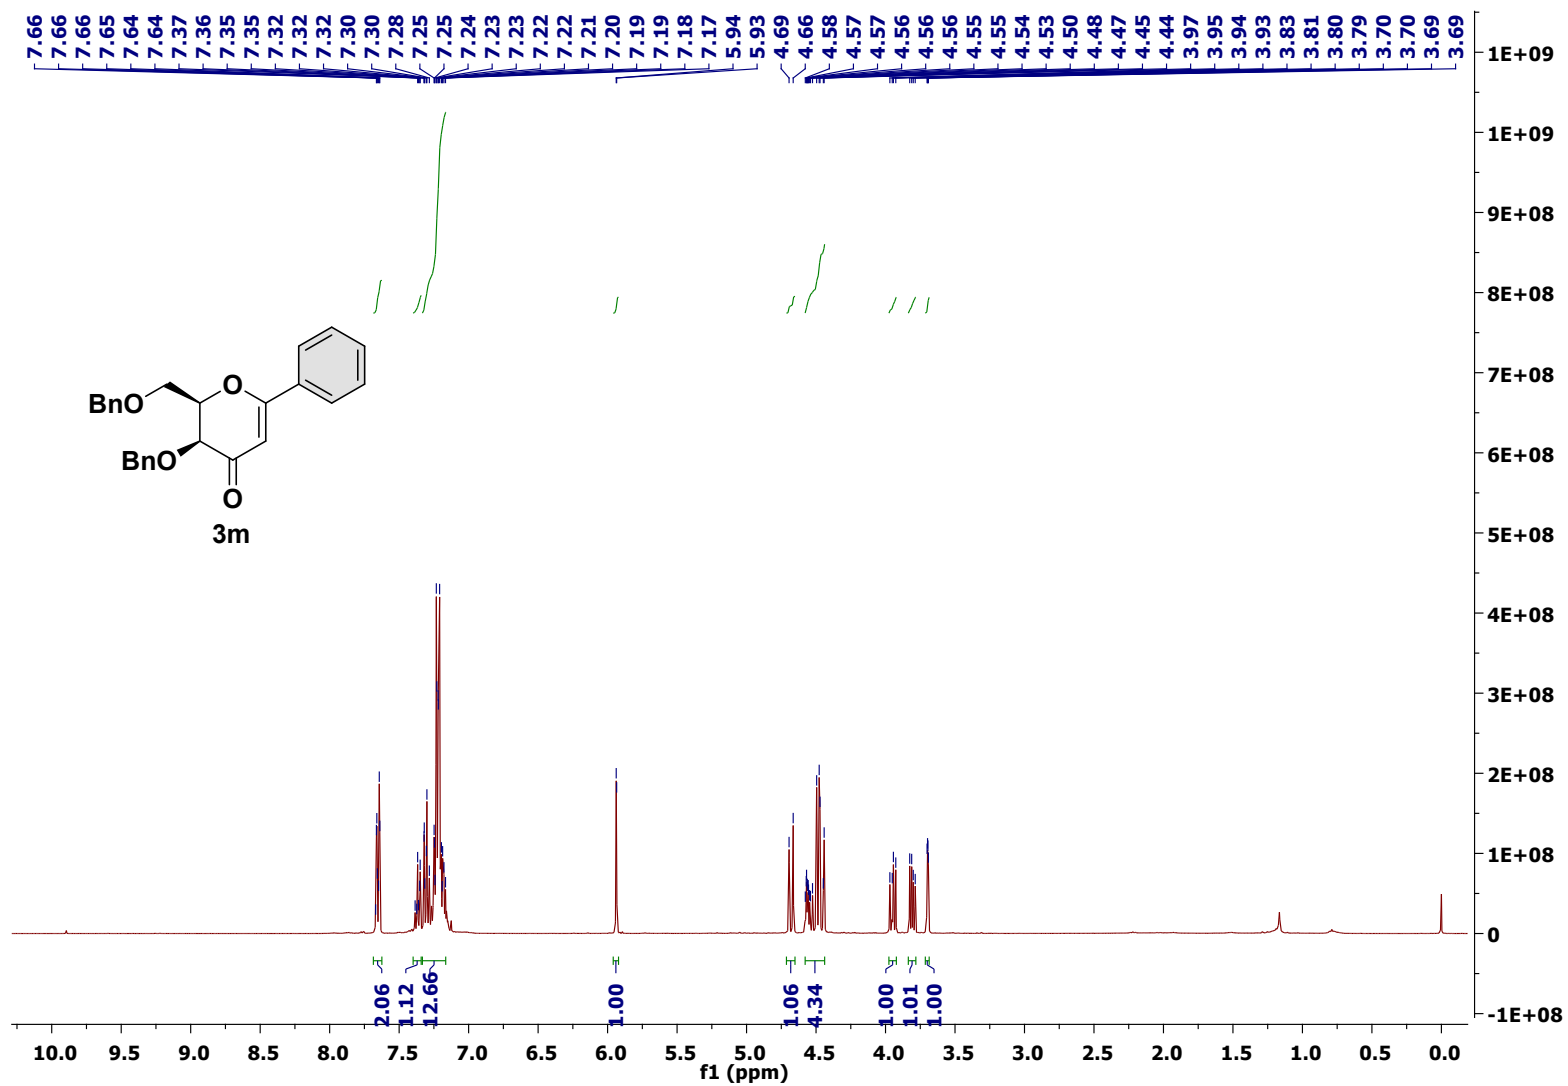

<sup>13</sup>C NMR {<sup>1</sup>H} (101 MHz) of **3m** in CDCl<sub>3</sub>

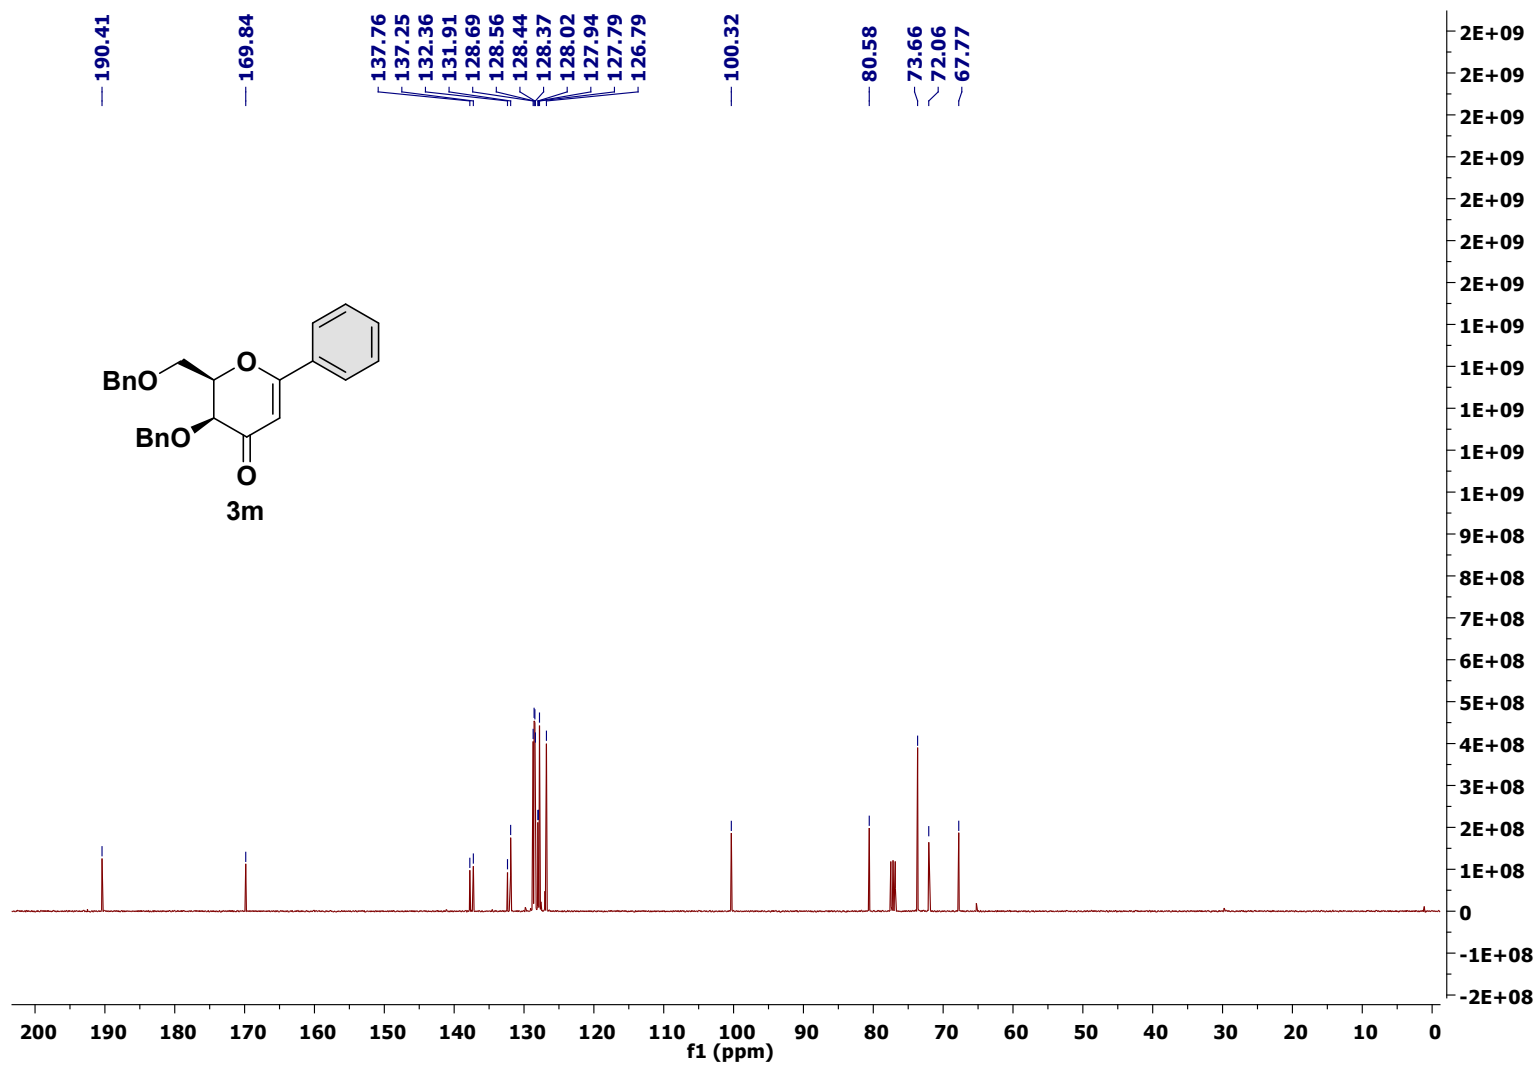

<sup>1</sup>H NMR (400 MHz) of **3n** in CDCl<sub>3</sub>

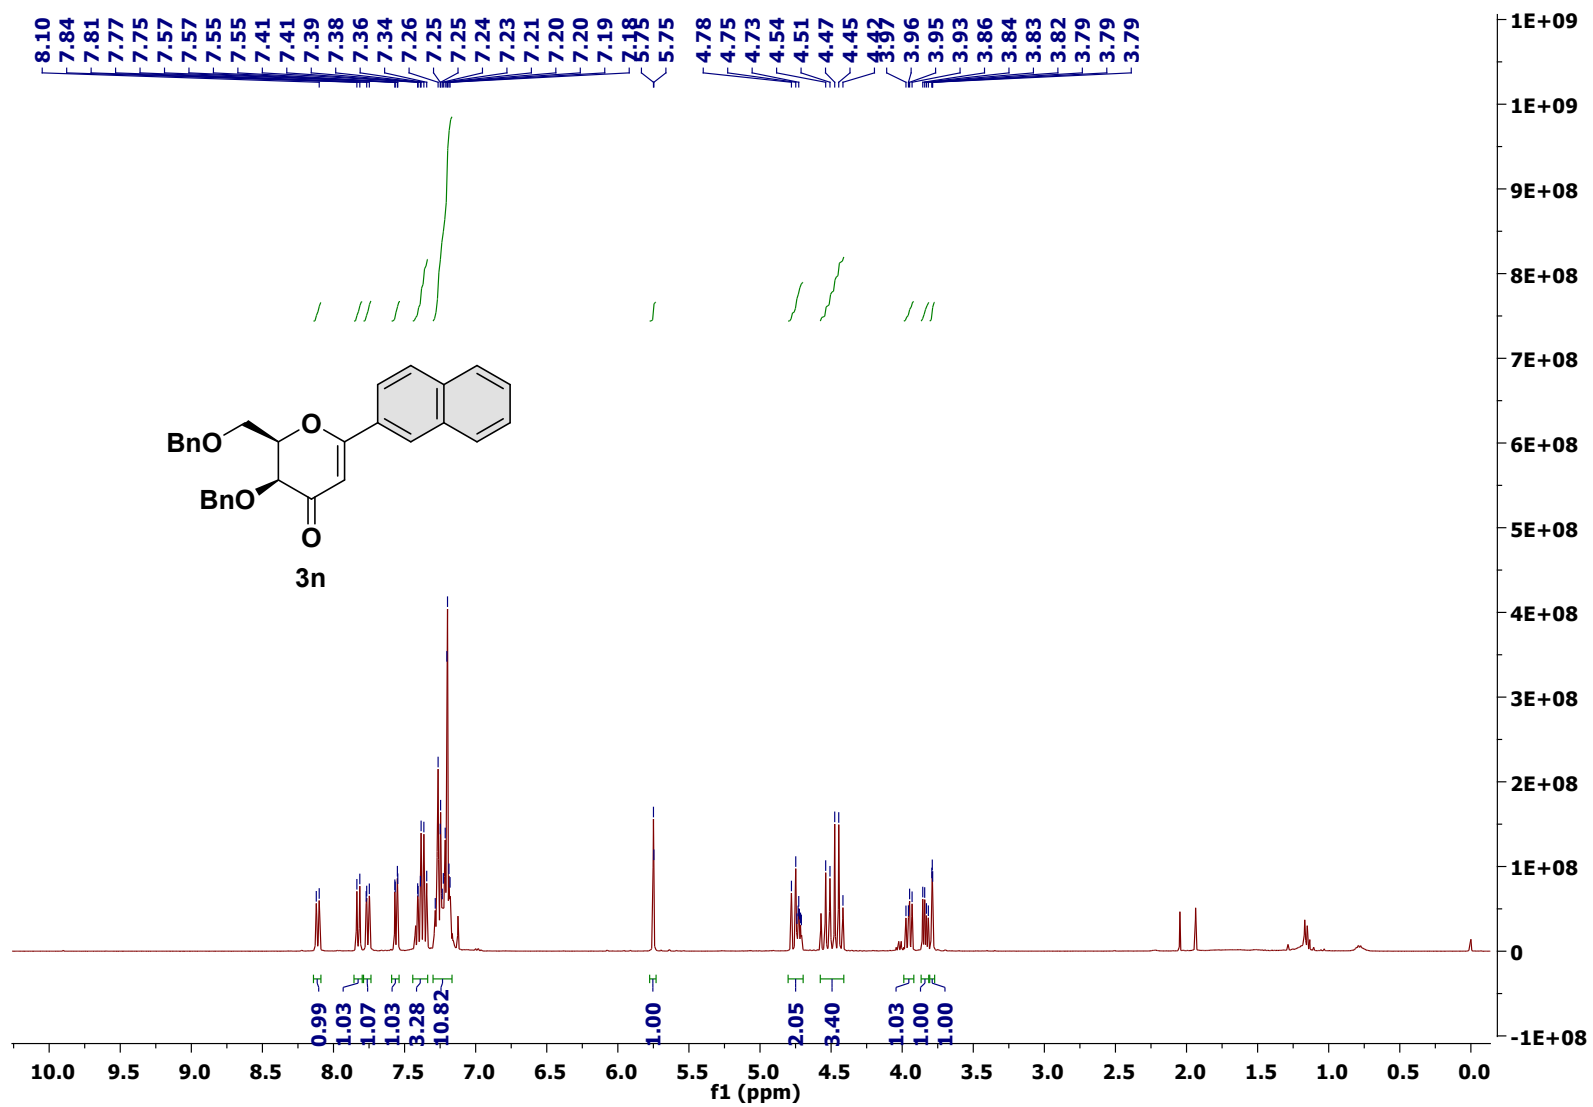

$^{13}\text{C}$  NMR  $\{^1\text{H}\}$  (101 MHz) of **3n** in  $\text{CDCl}_3$

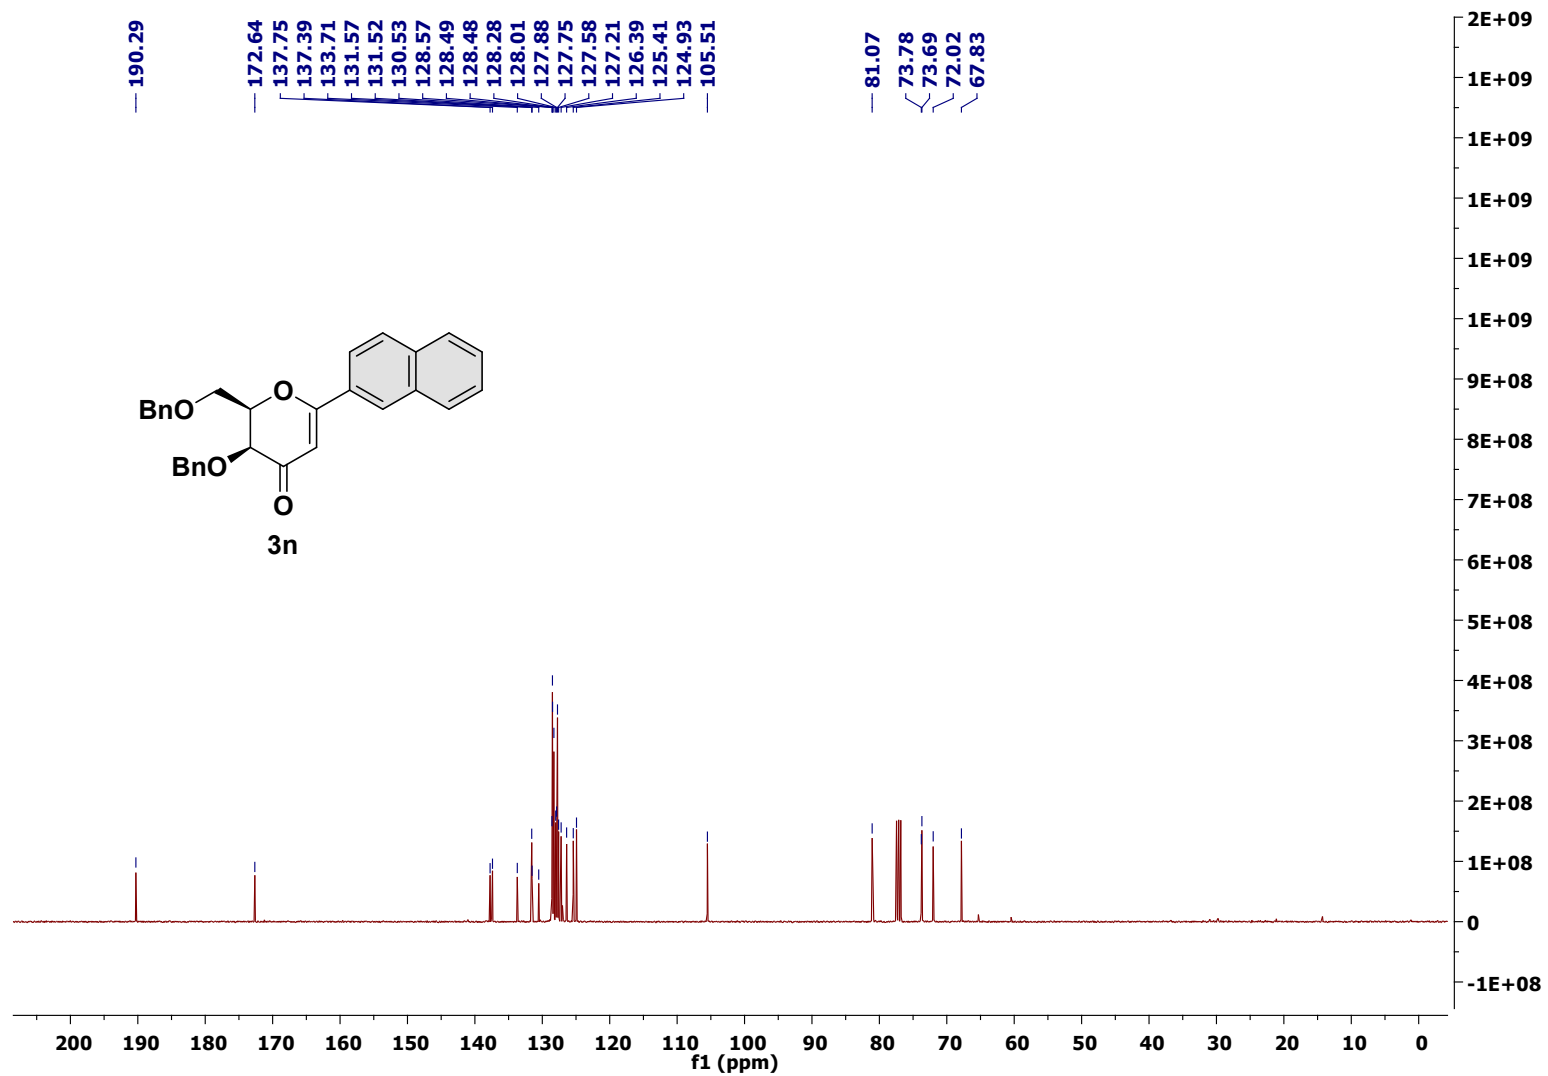

<sup>1</sup>H NMR (400 MHz) of **3o** in CDCl<sub>3</sub>

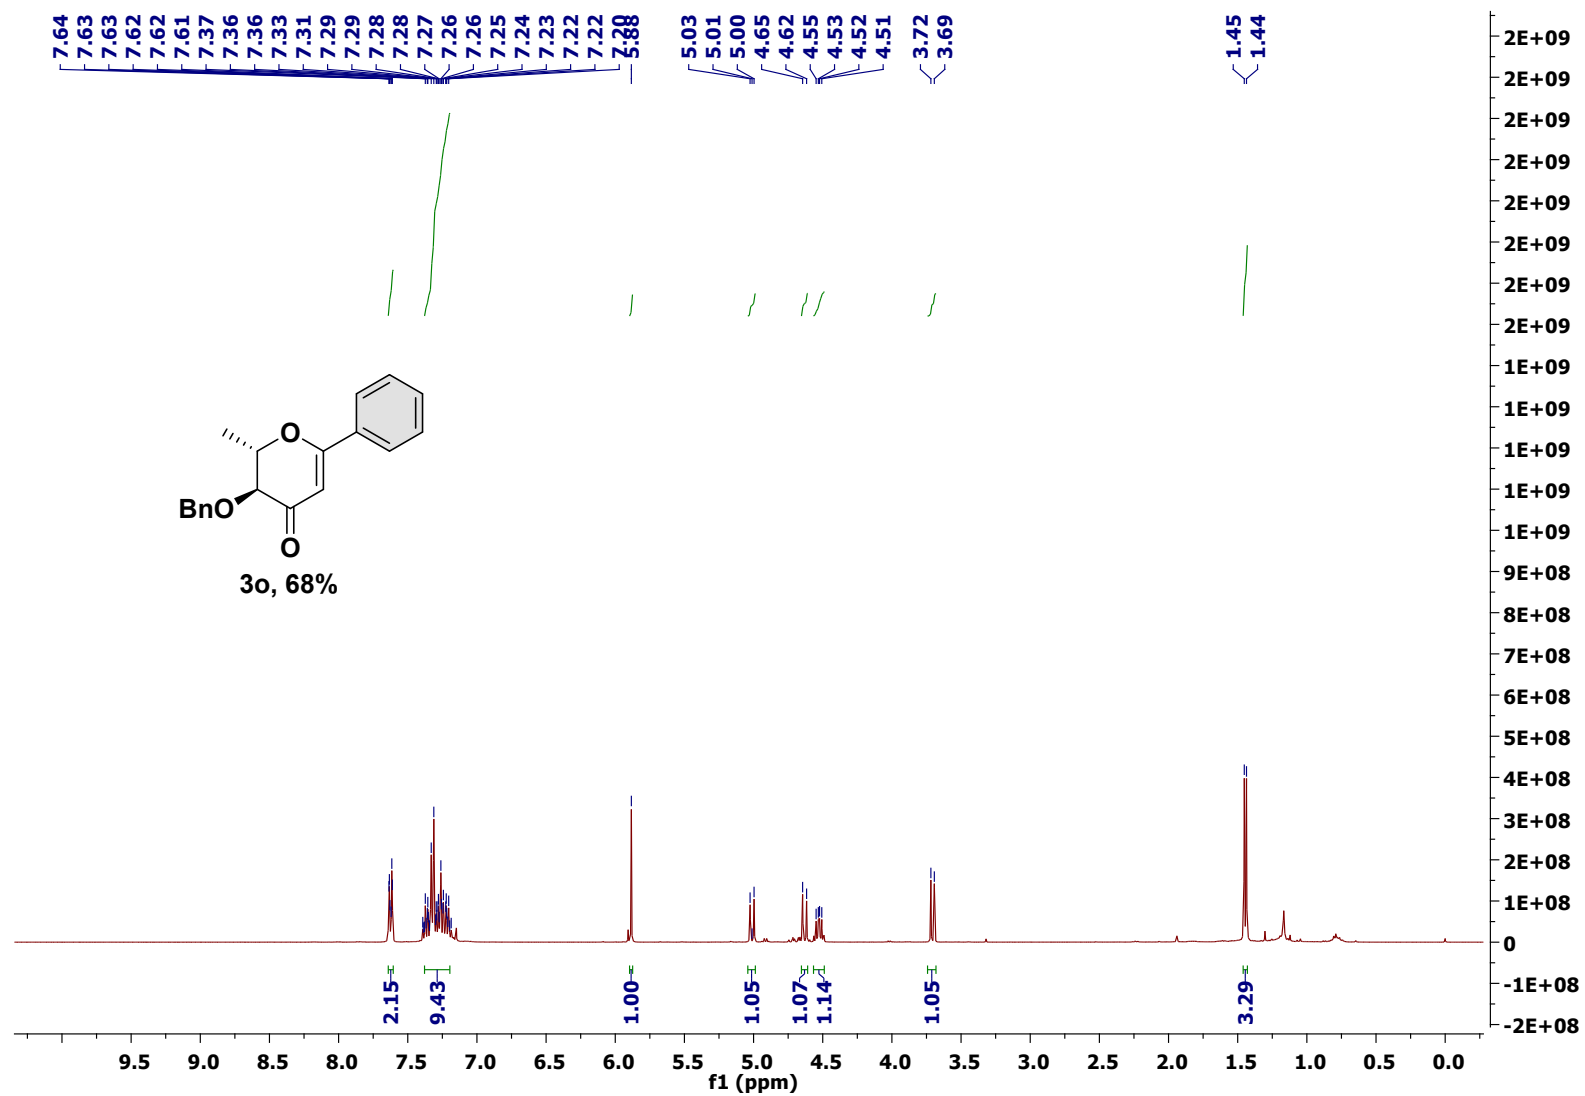

$^{13}\text{C}$  NMR  $\{^1\text{H}\}$  (101 MHz) of **3o** in  $\text{CDCl}_3$

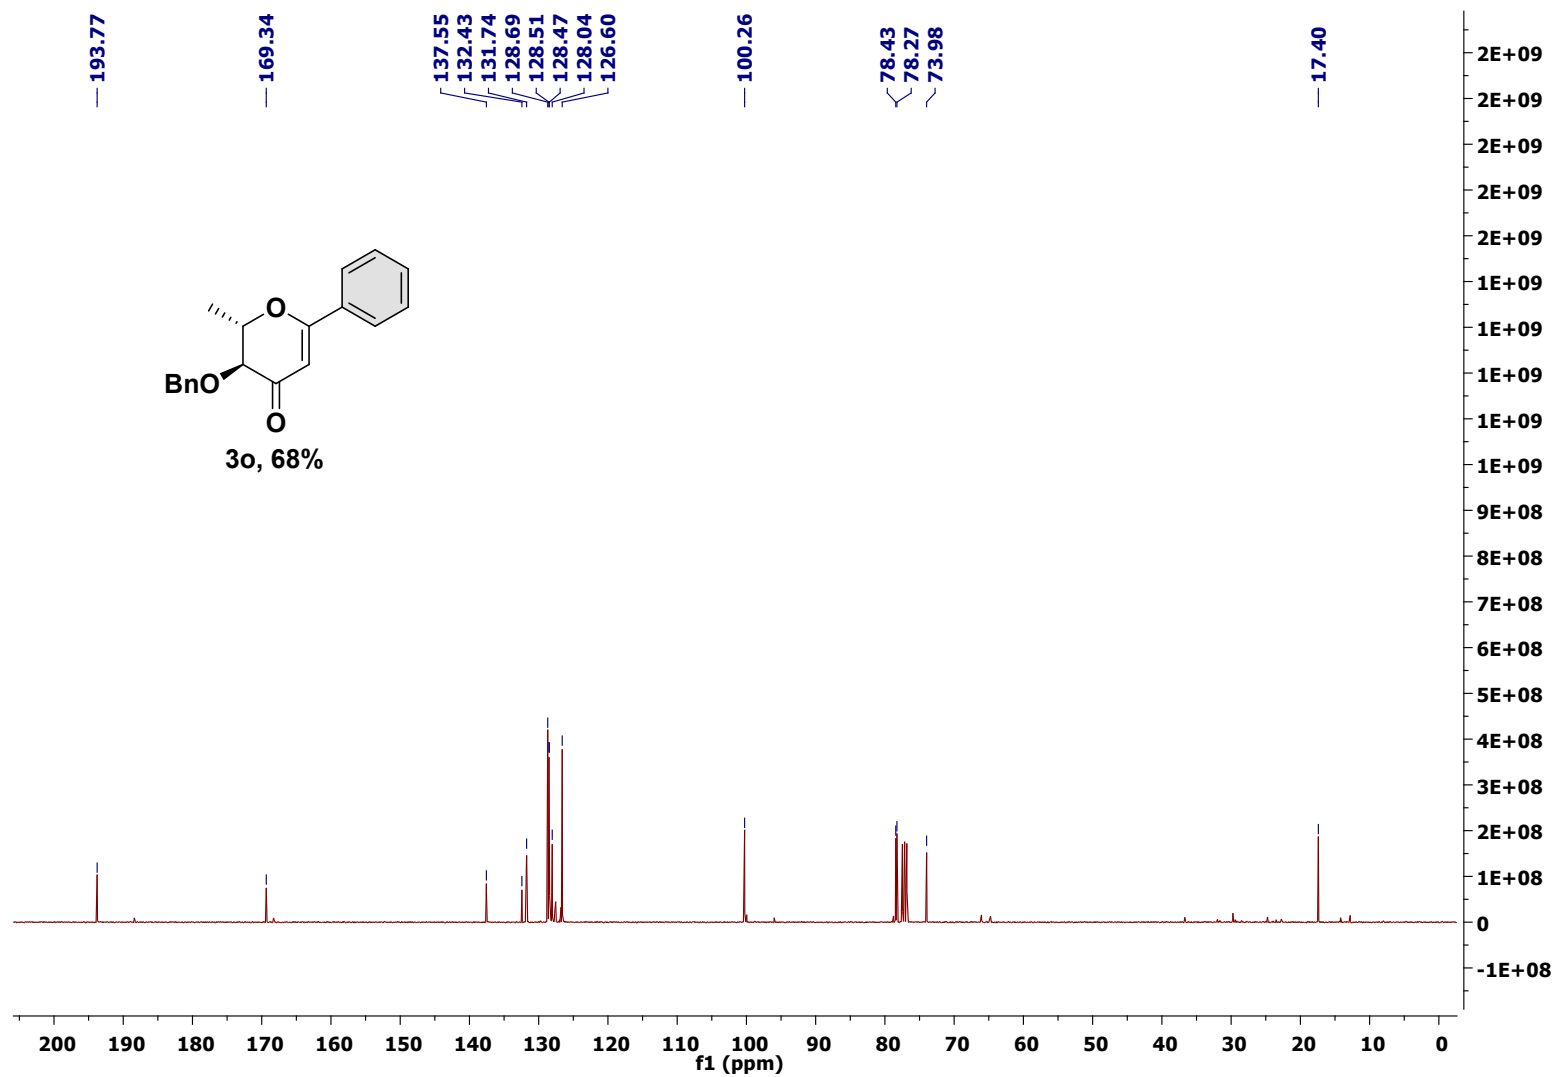

<sup>1</sup>H NMR (400 MHz) of **3p** in CDCl<sub>3</sub>



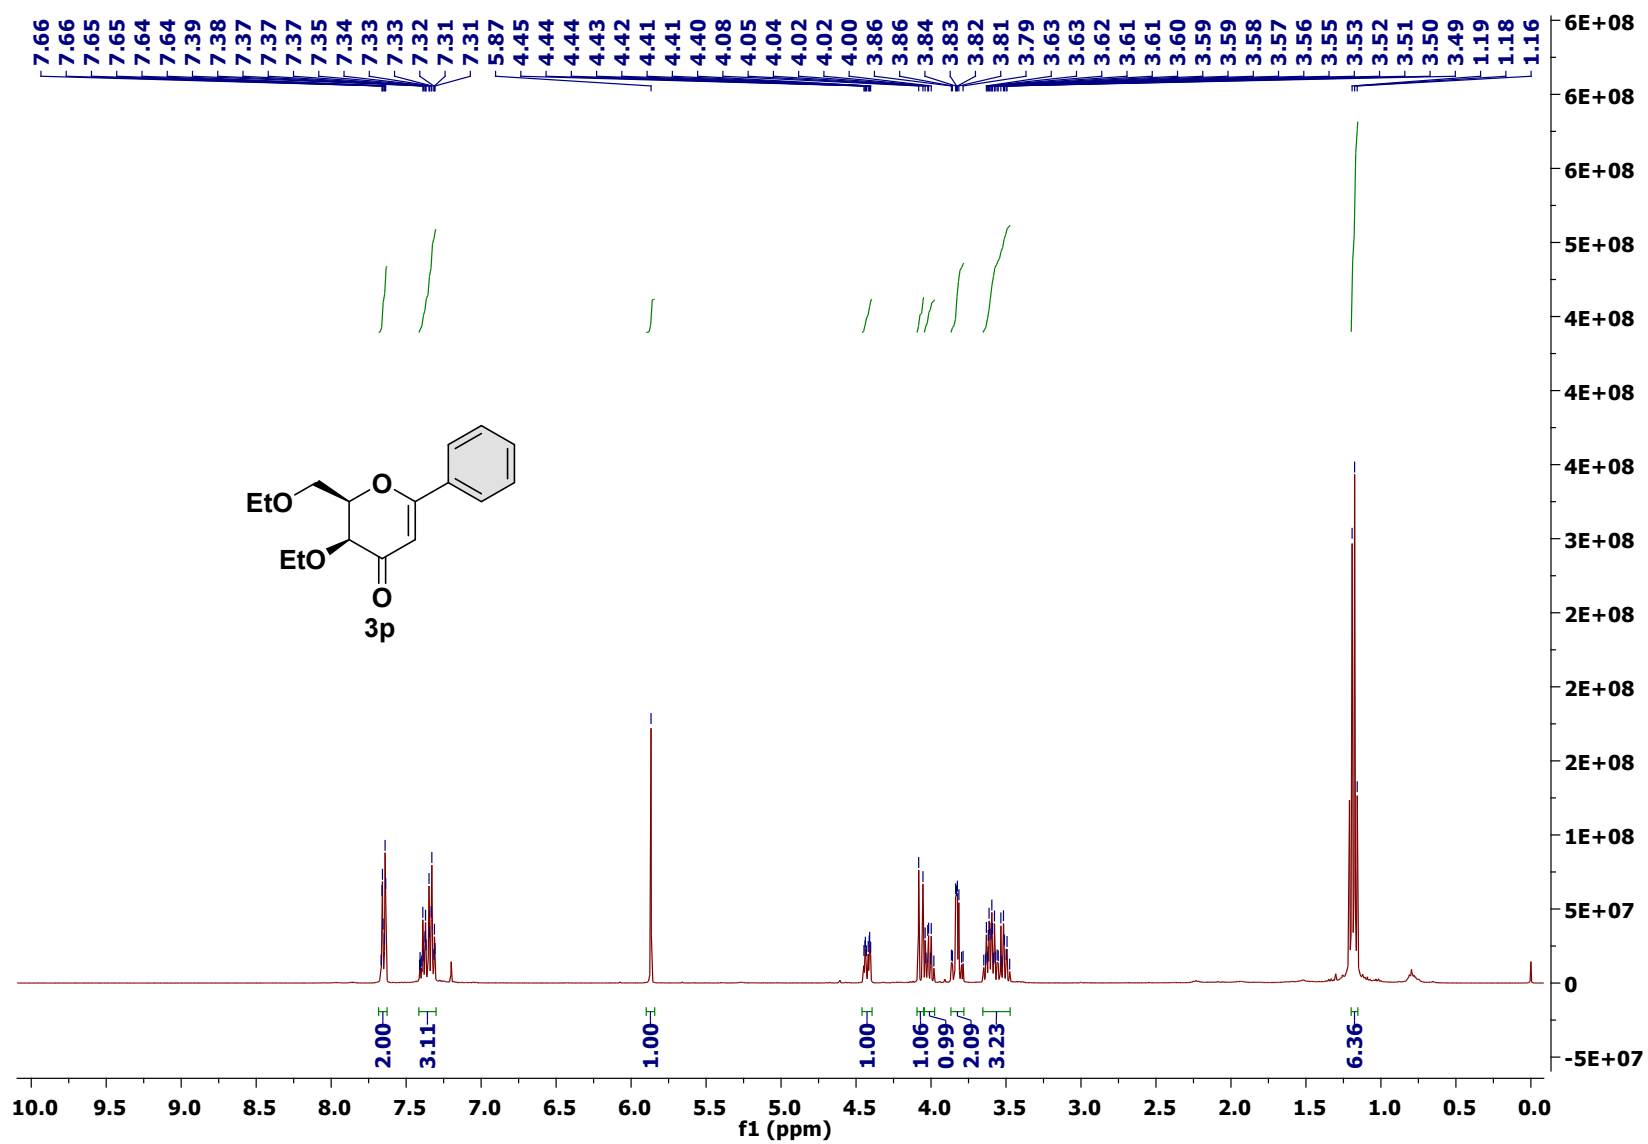

<sup>13</sup>C NMR {<sup>1</sup>H} (101 MHz) of **3p** in CDCl<sub>3</sub>

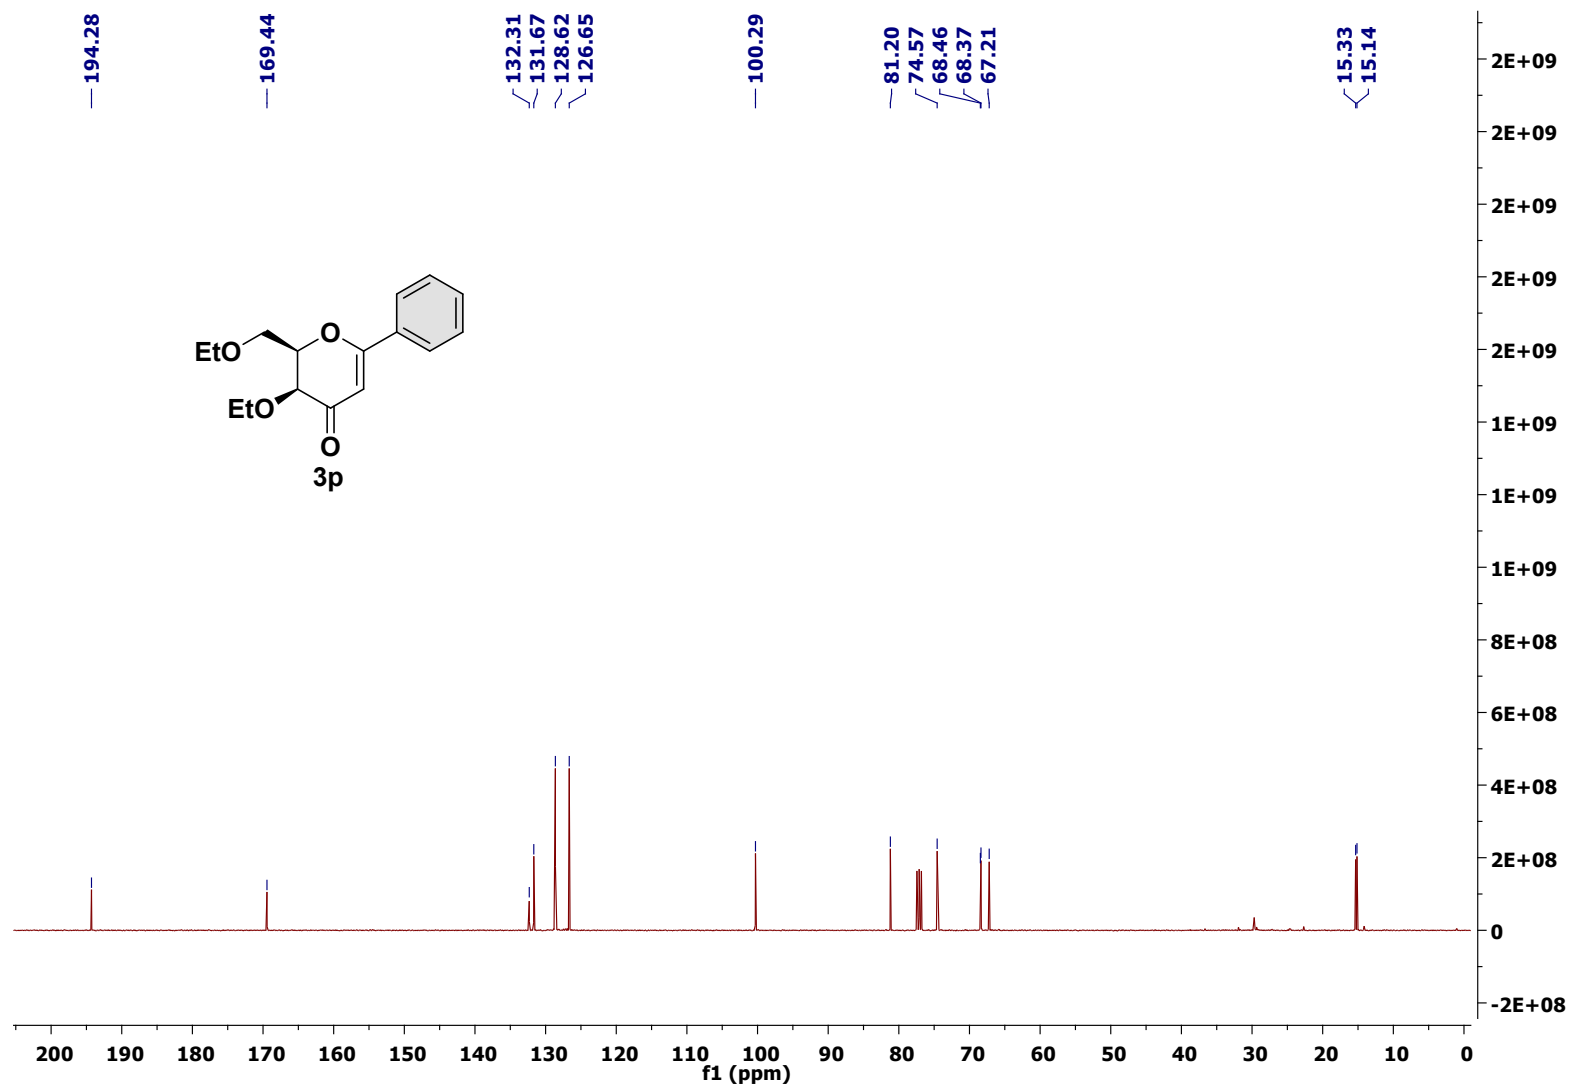

<sup>1</sup>H NMR (400 MHz) of 3q in CDCl<sub>3</sub>



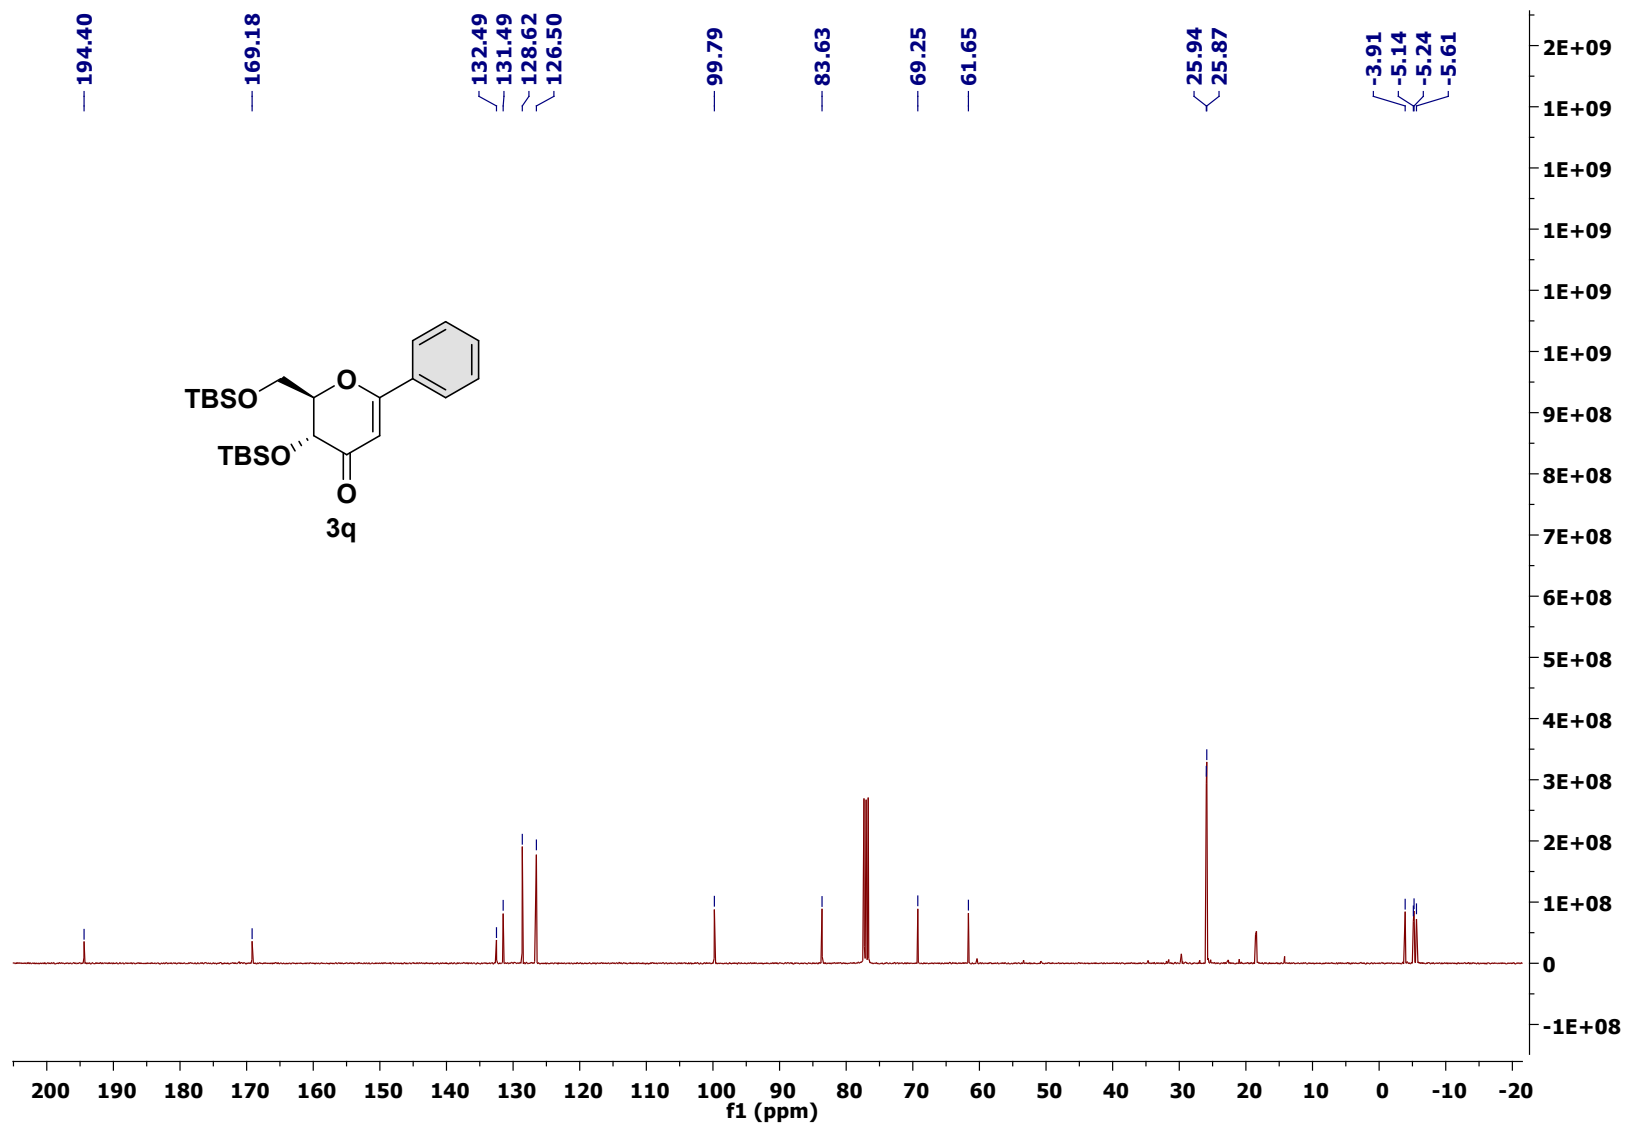

<sup>1</sup>H NMR (400 MHz) of **4a** in CDCl<sub>3</sub>

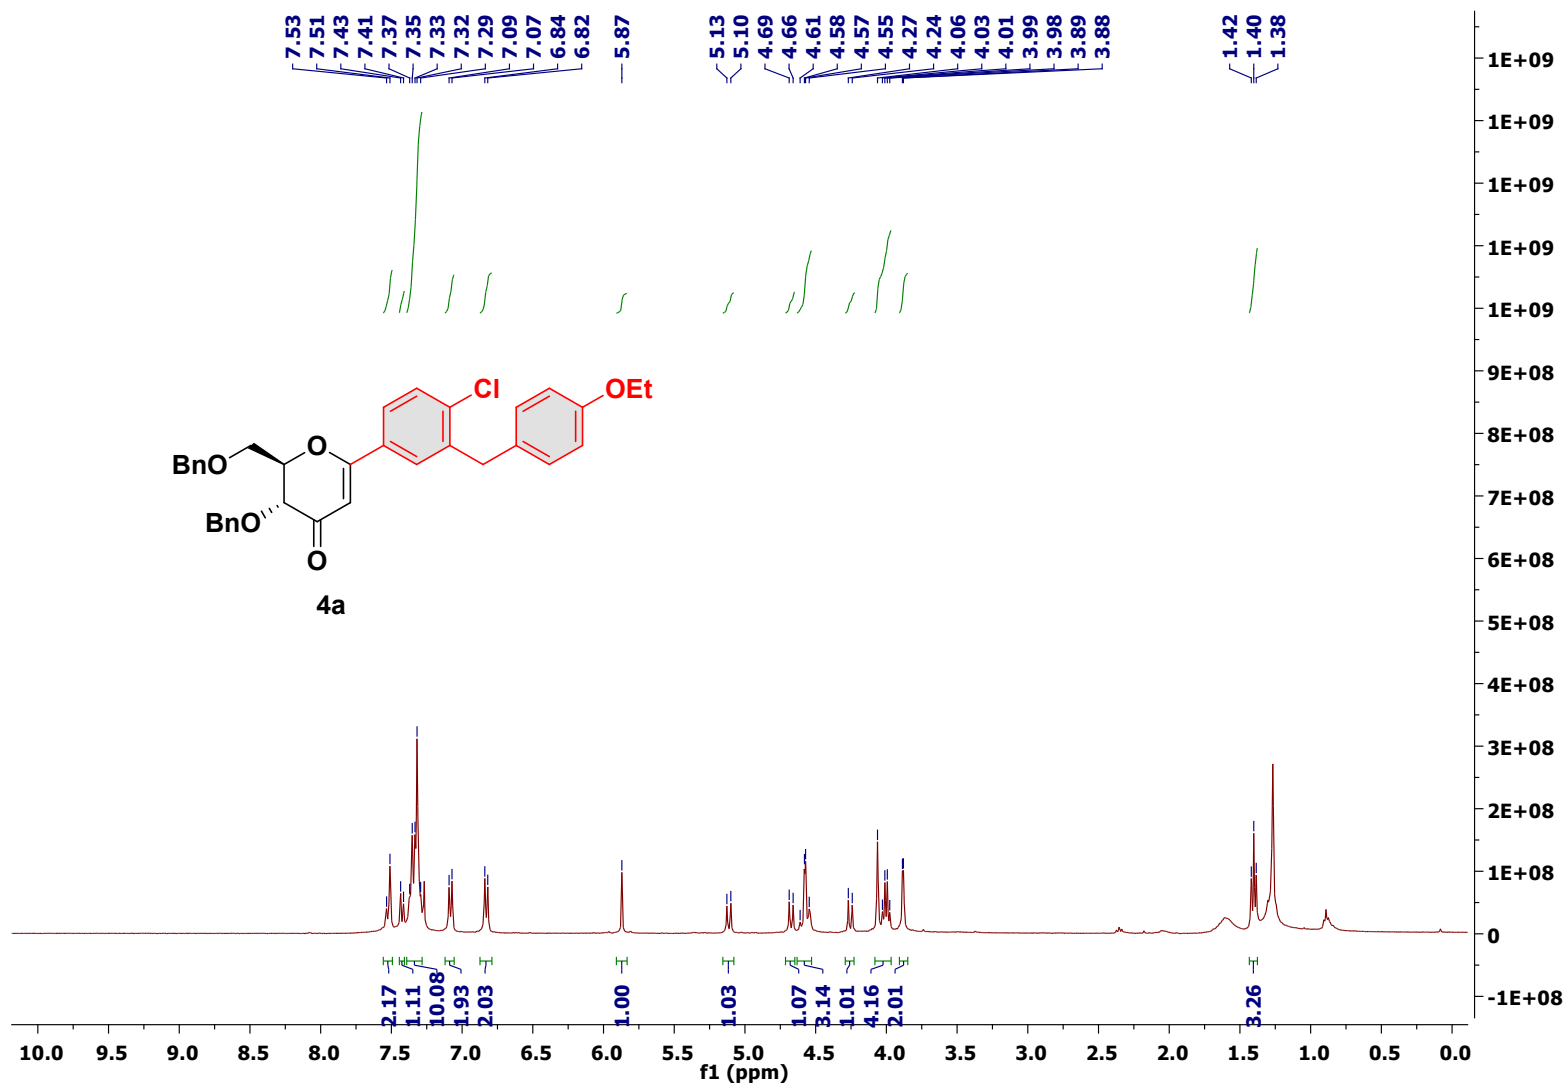

$^{13}\text{C}$  NMR  $\{^1\text{H}\}$  (101 MHz) of **4a** in  $\text{CDCl}_3$

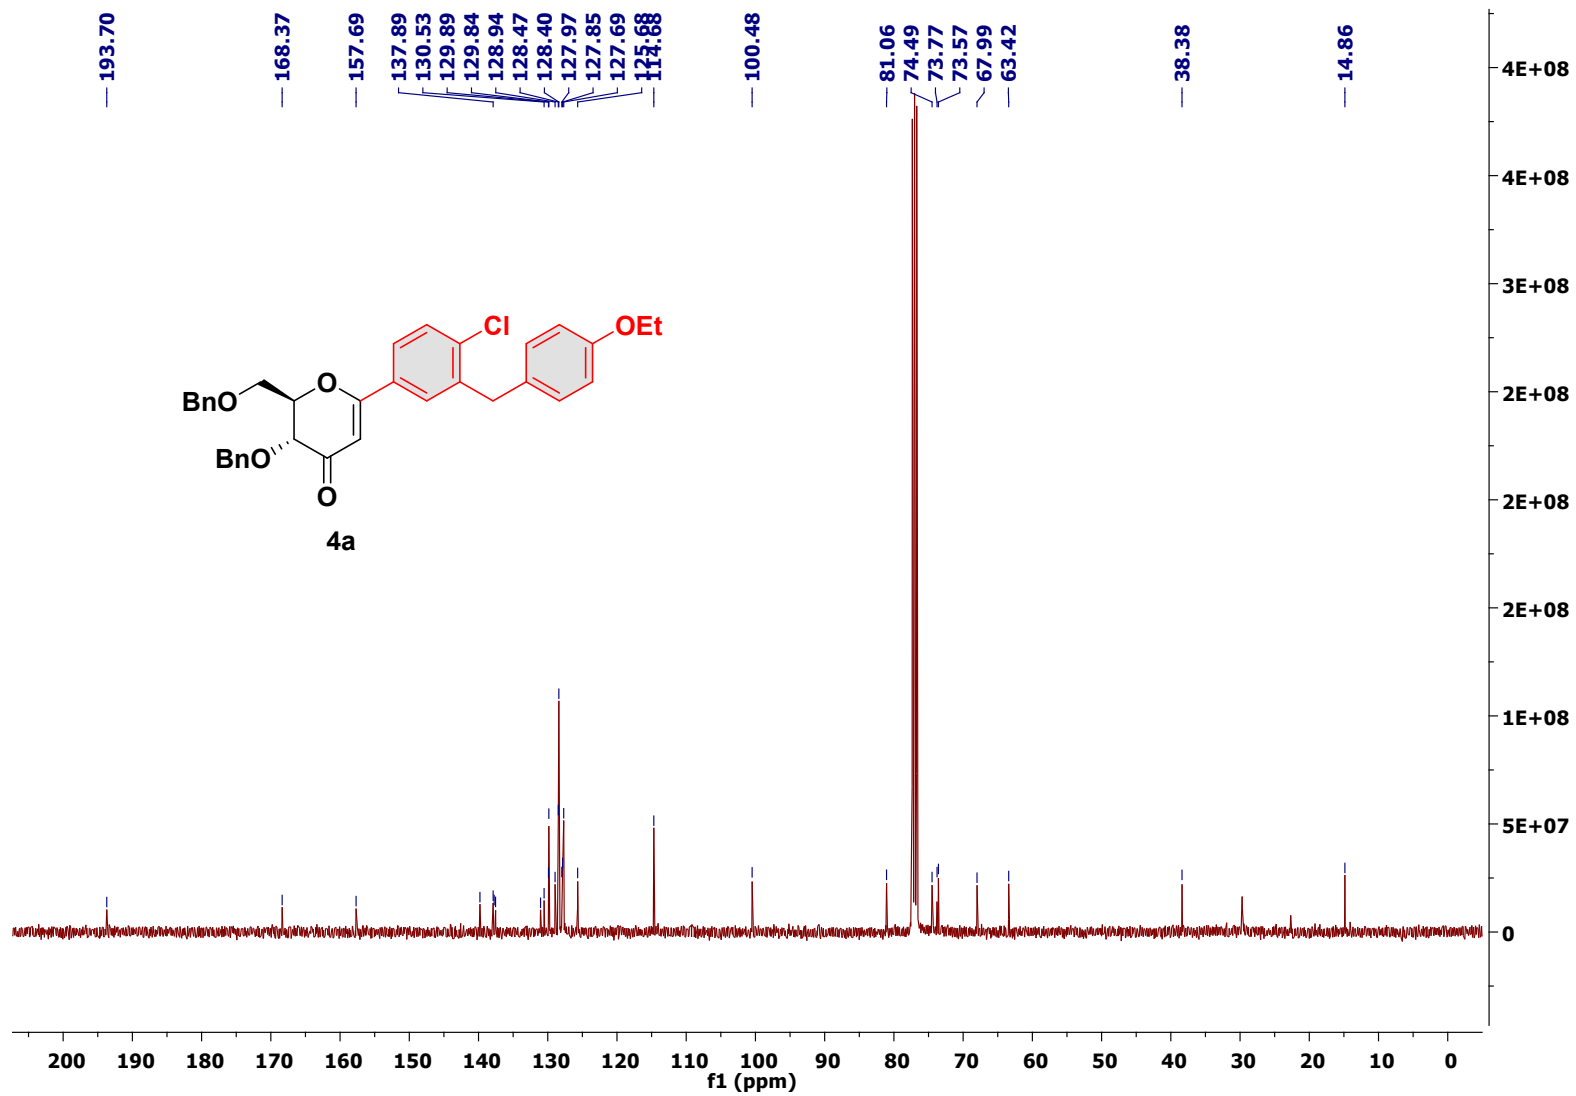

<sup>1</sup>H NMR (400 MHz) of **4b** in CDCl<sub>3</sub>

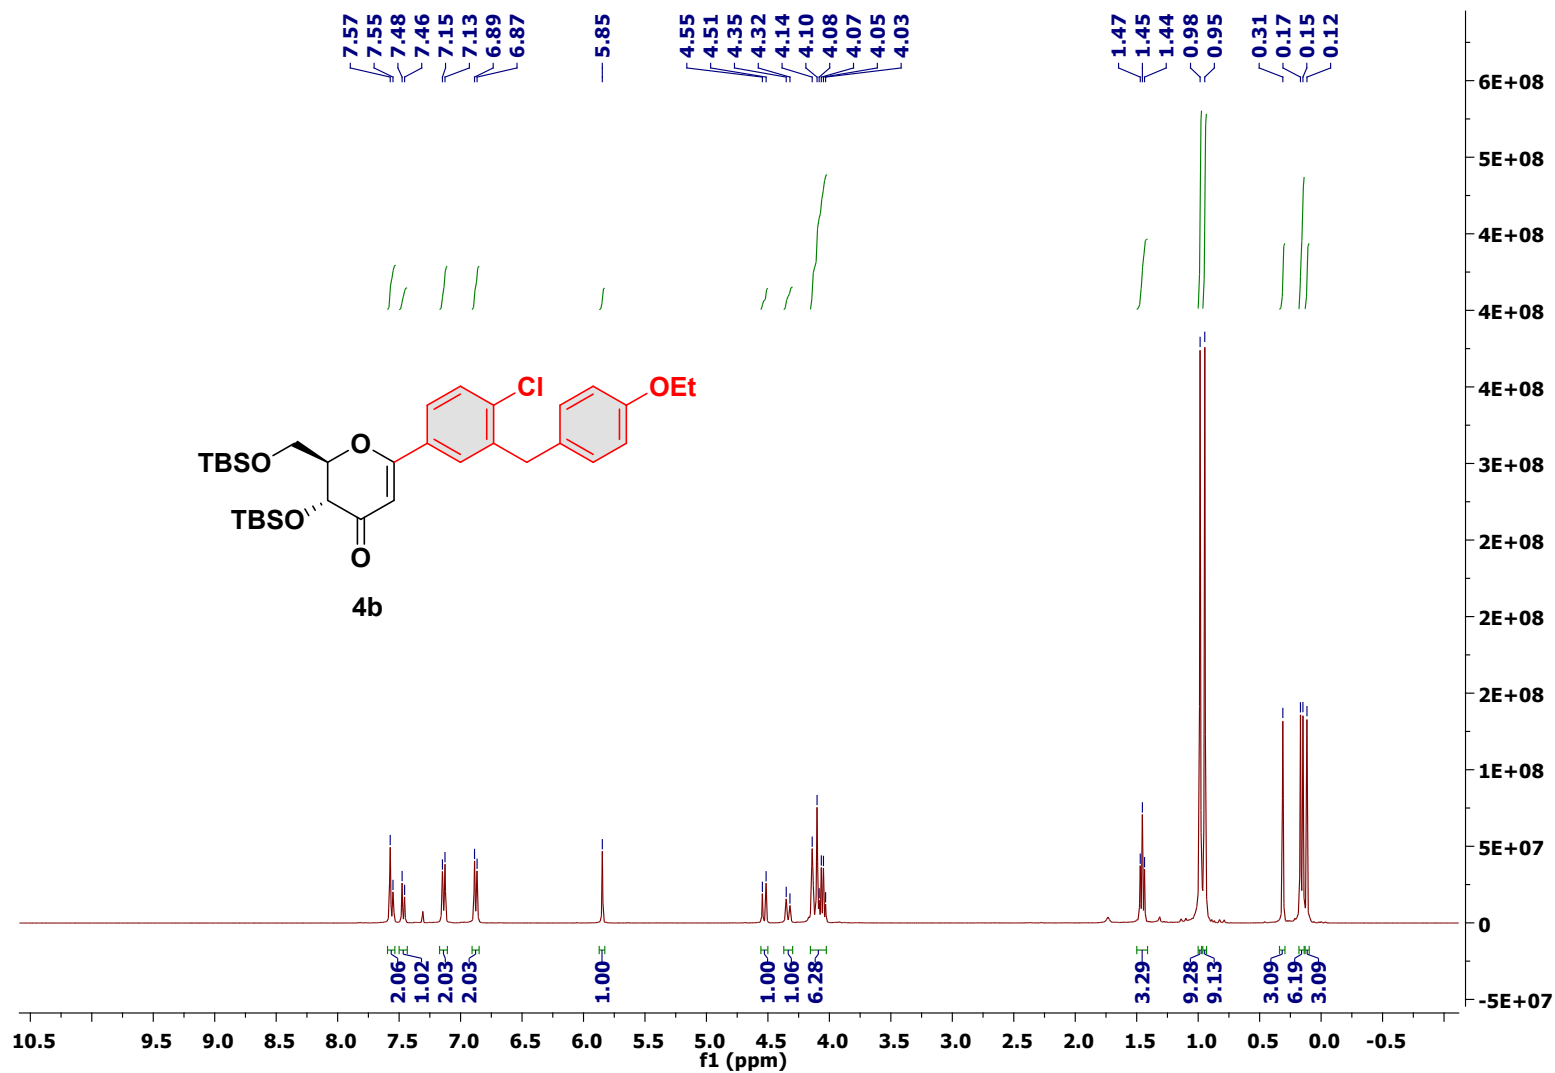

$^1\text{H}$  NMR (101 MHz) of **4b** in  $\text{CDCl}_3$

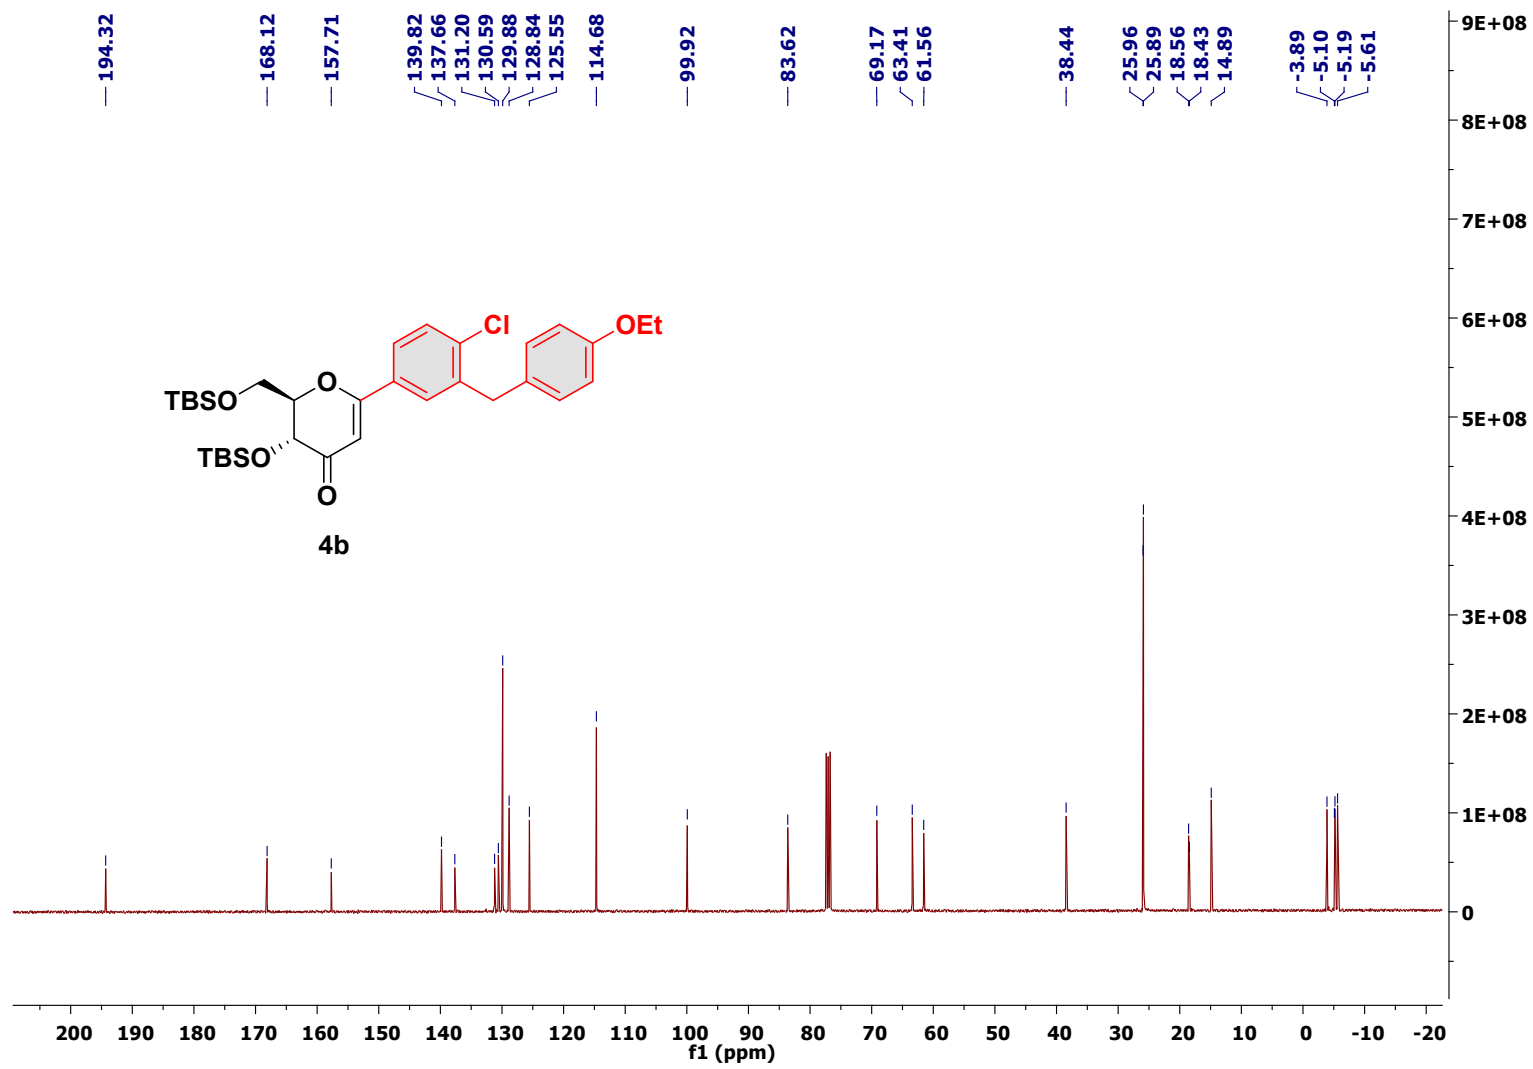

<sup>1</sup>H NMR (400 MHz) of **4c** in CDCl<sub>3</sub>



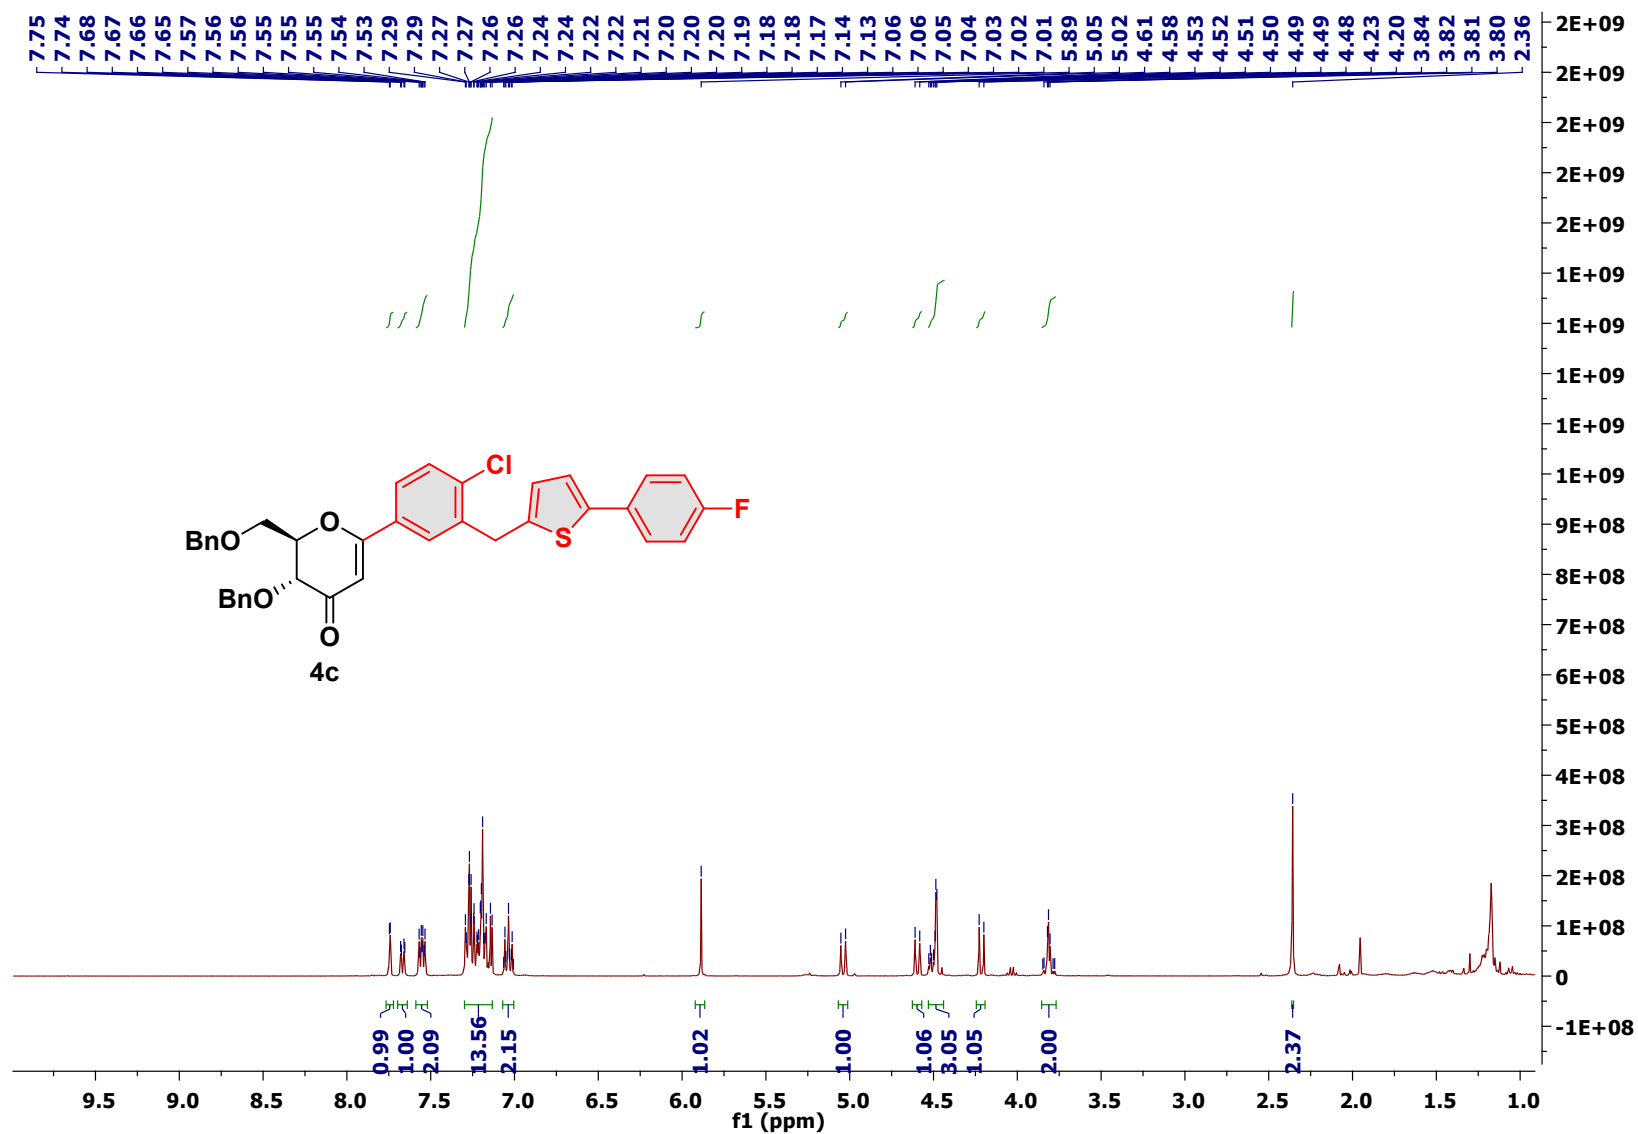

<sup>13</sup>C NMR {<sup>1</sup>H} (101 MHz) of **4c** in CDCl<sub>3</sub>

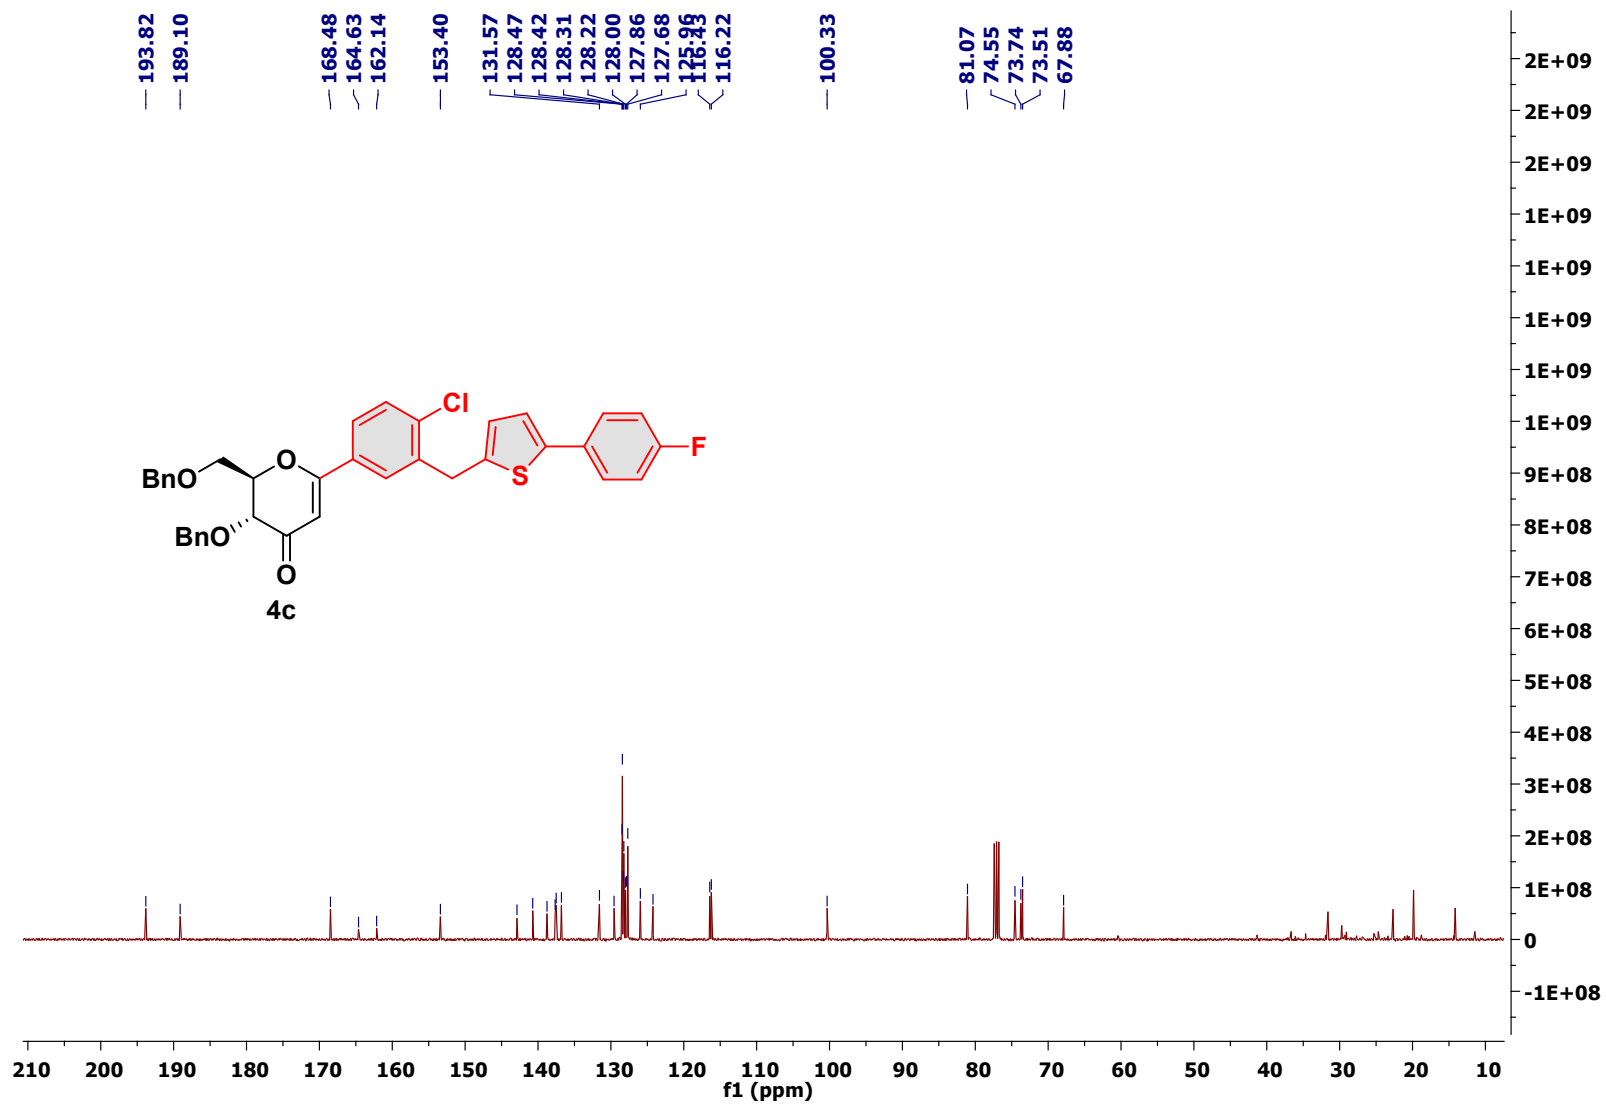

<sup>1</sup>H NMR (400 MHz) of 7 in CDCl<sub>3</sub>

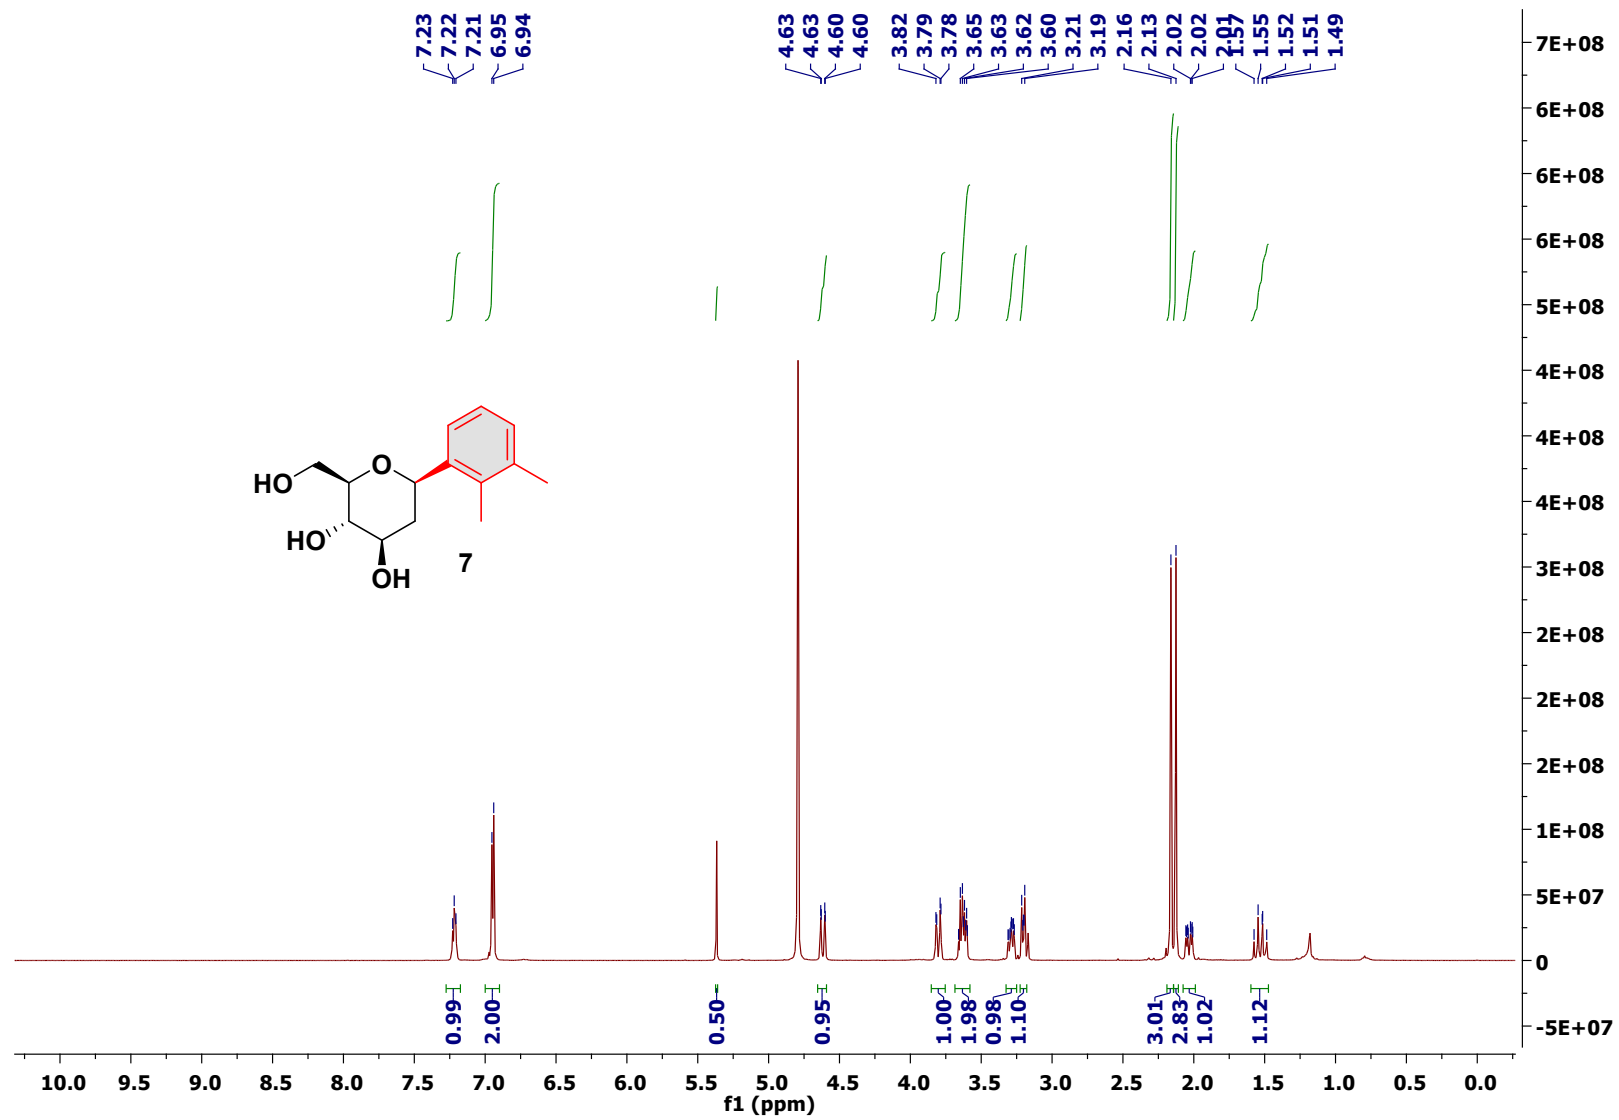

$^{13}\text{C}$  NMR  $\{^1\text{H}\}$  (101 MHz) of 7 in  $\text{CDCl}_3$

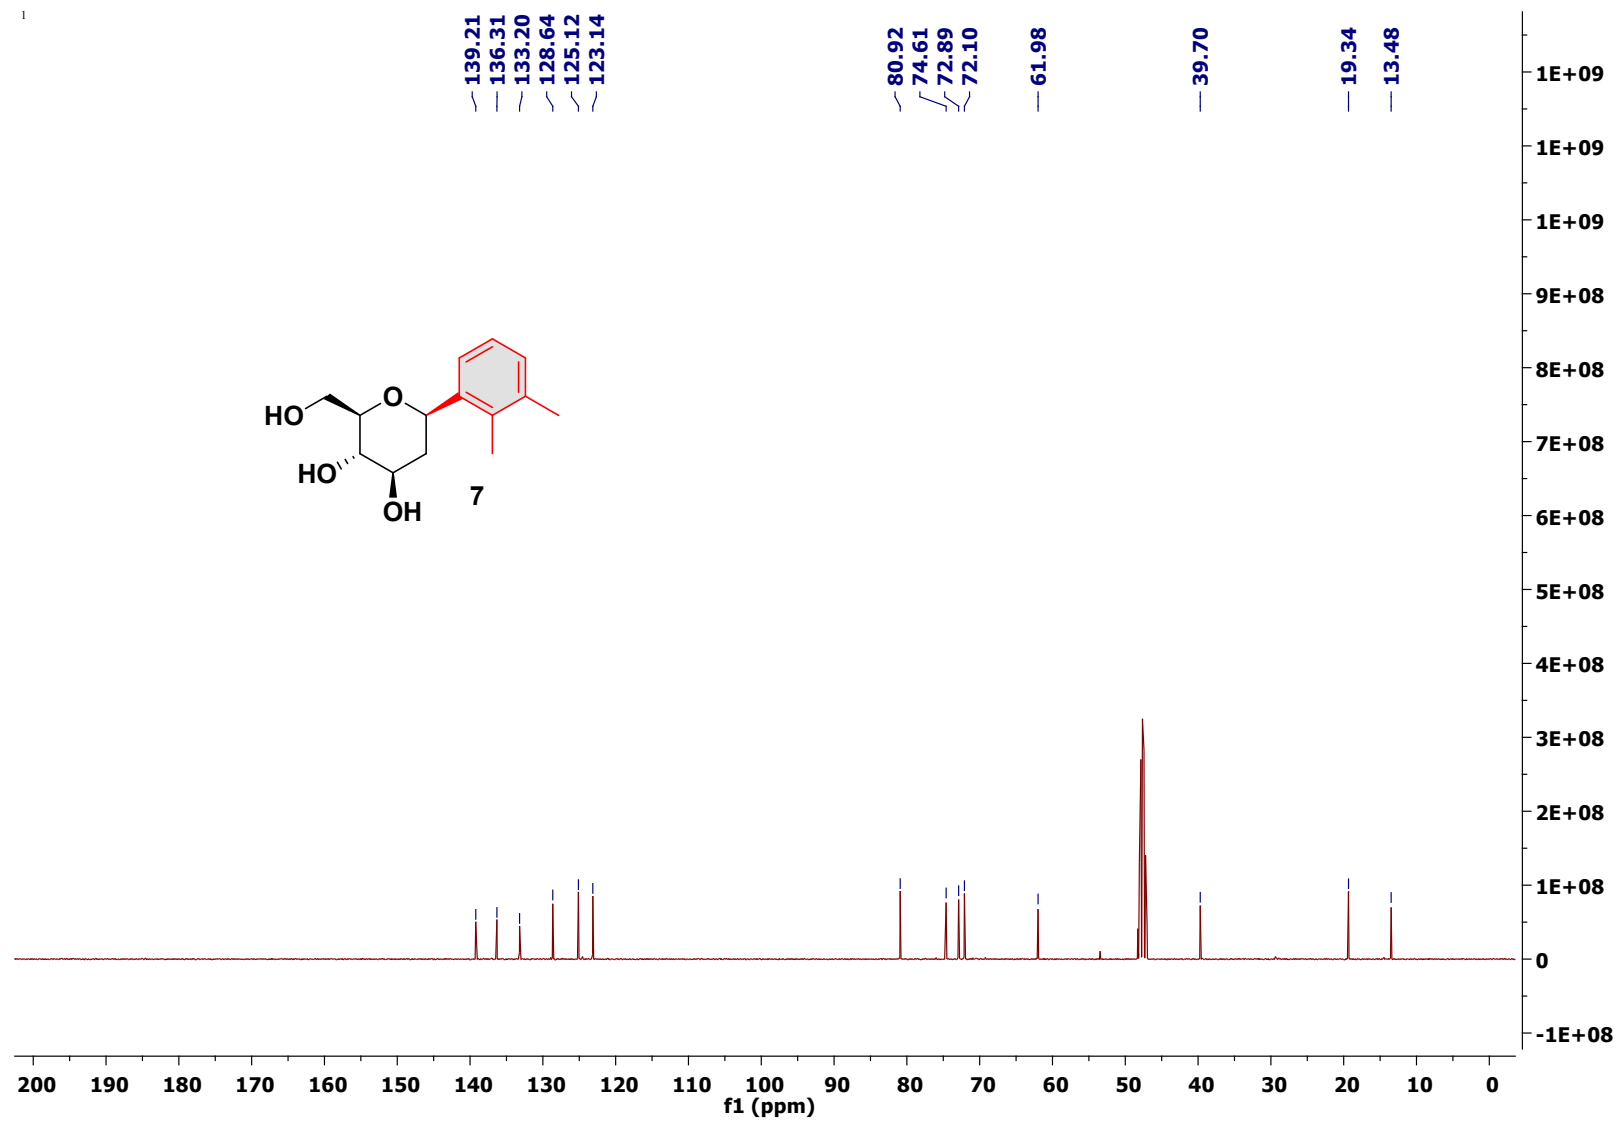

HSQC table of compound 7

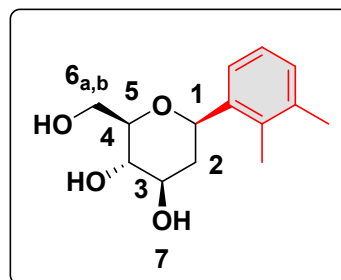

|    | <sup>1</sup> H                                                       | <sup>13</sup> C |
|----|----------------------------------------------------------------------|-----------------|
| 1. | <b>H<sub>1</sub></b> = 4.62 (dd, <i>J</i> = 11.3, 1.3 Hz, 1H)        | 74.6            |
| 2. | <b>H<sub>2a</sub></b> = 1.53 (dd, <i>J</i> = 24.3, 11.5 Hz, 1H)      | 39.7            |
| 3. | <b>H<sub>2b</sub></b> = 2.03 (ddd, <i>J</i> = 12.9, 4.9, 1.6 Hz, 1H) | 39.7            |
| 4. | <b>H<sub>3</sub> and H<sub>6a</sub></b> = 3.67 – 3.57 (m, 2H)        | 72.9 and 62.0   |
| 5. | <b>H<sub>4</sub></b> = 3.23 – 3.18 (m, 1H)                           | 72.1            |
| 6. | <b>H<sub>5</sub></b> = 3.29 (ddd, <i>J</i> = 9.3, 5.8, 2.2 Hz, 1H)   | 80.9            |
| 7. | <b>H<sub>6b</sub></b> = 3.80 (dd, <i>J</i> = 11.9, 2.2 Hz, 1H)       | 62.0            |

COSY of compound 7

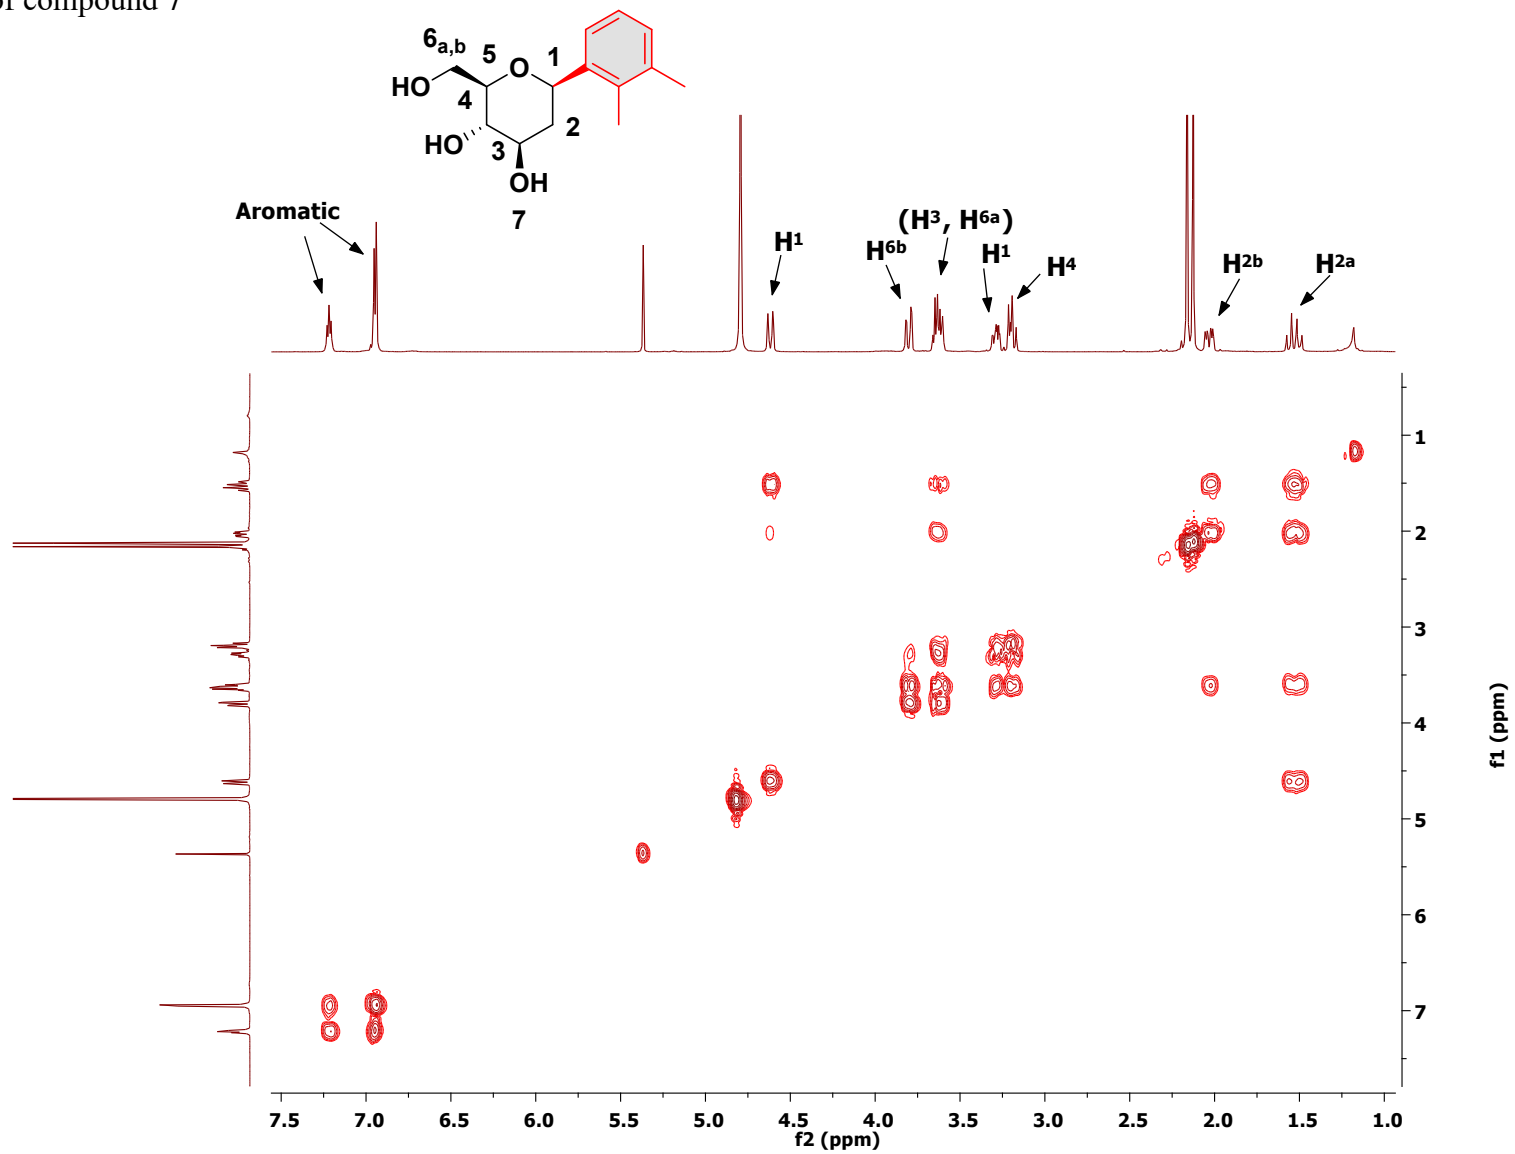

NOESY of compound 7

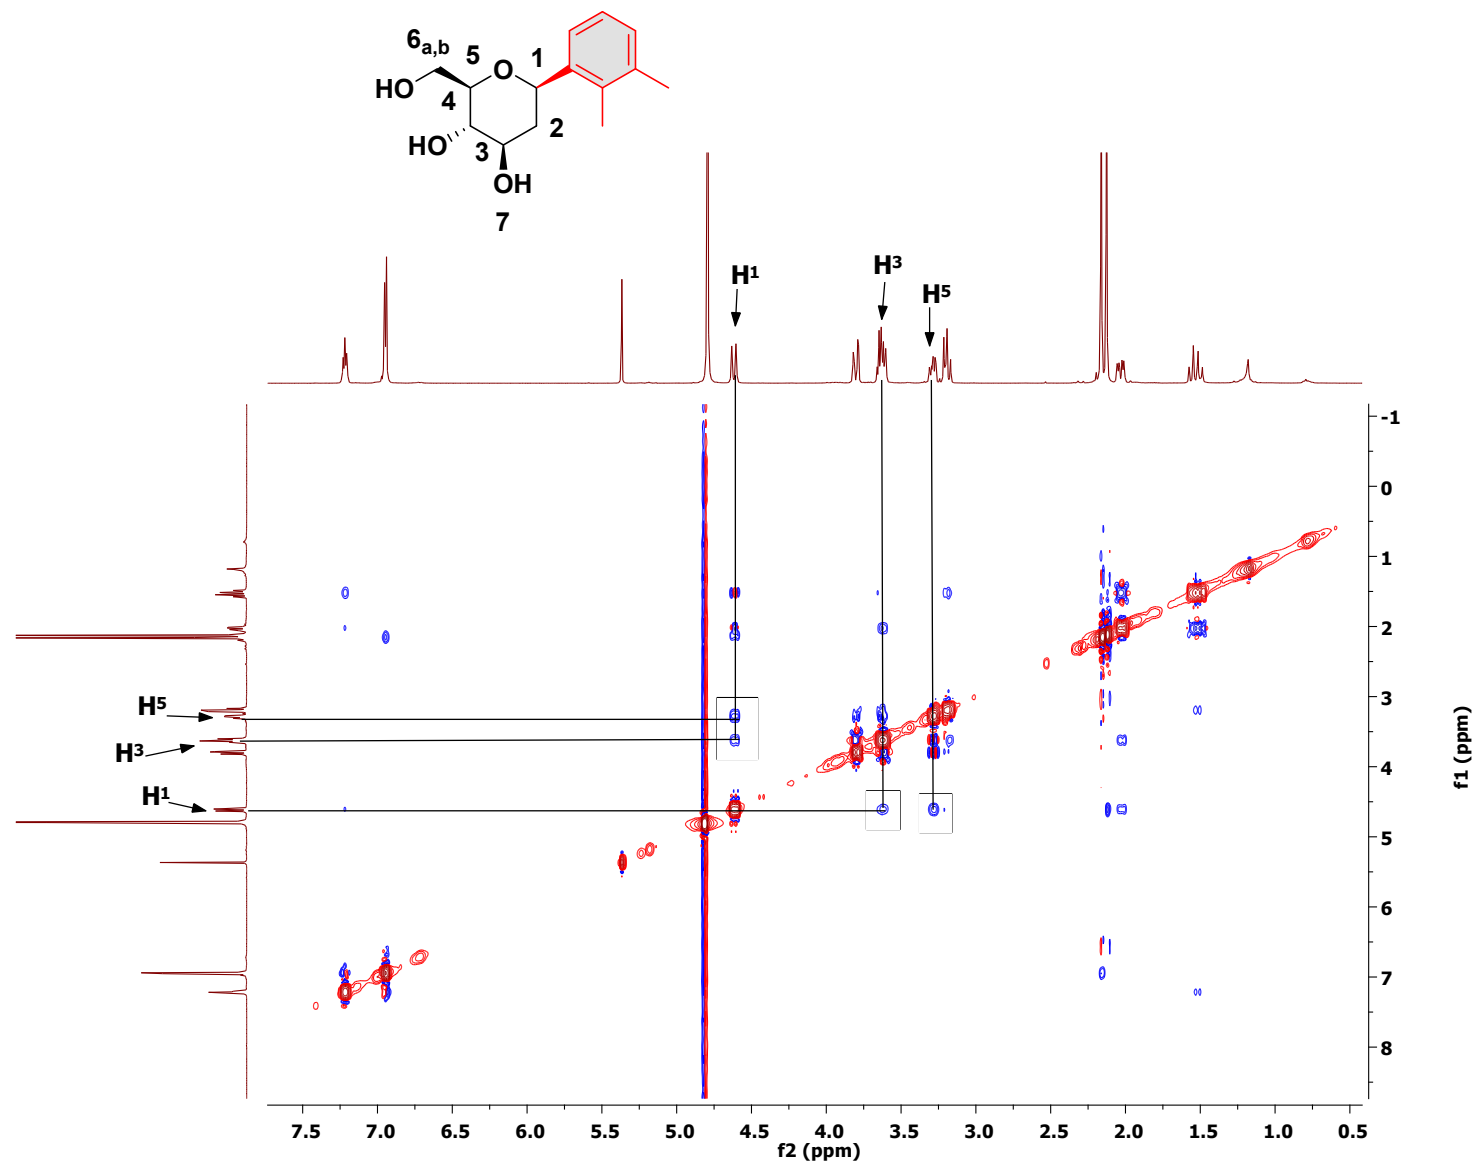

HSQC of compound 7

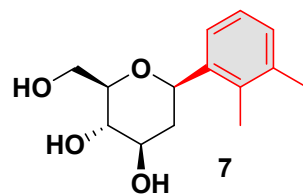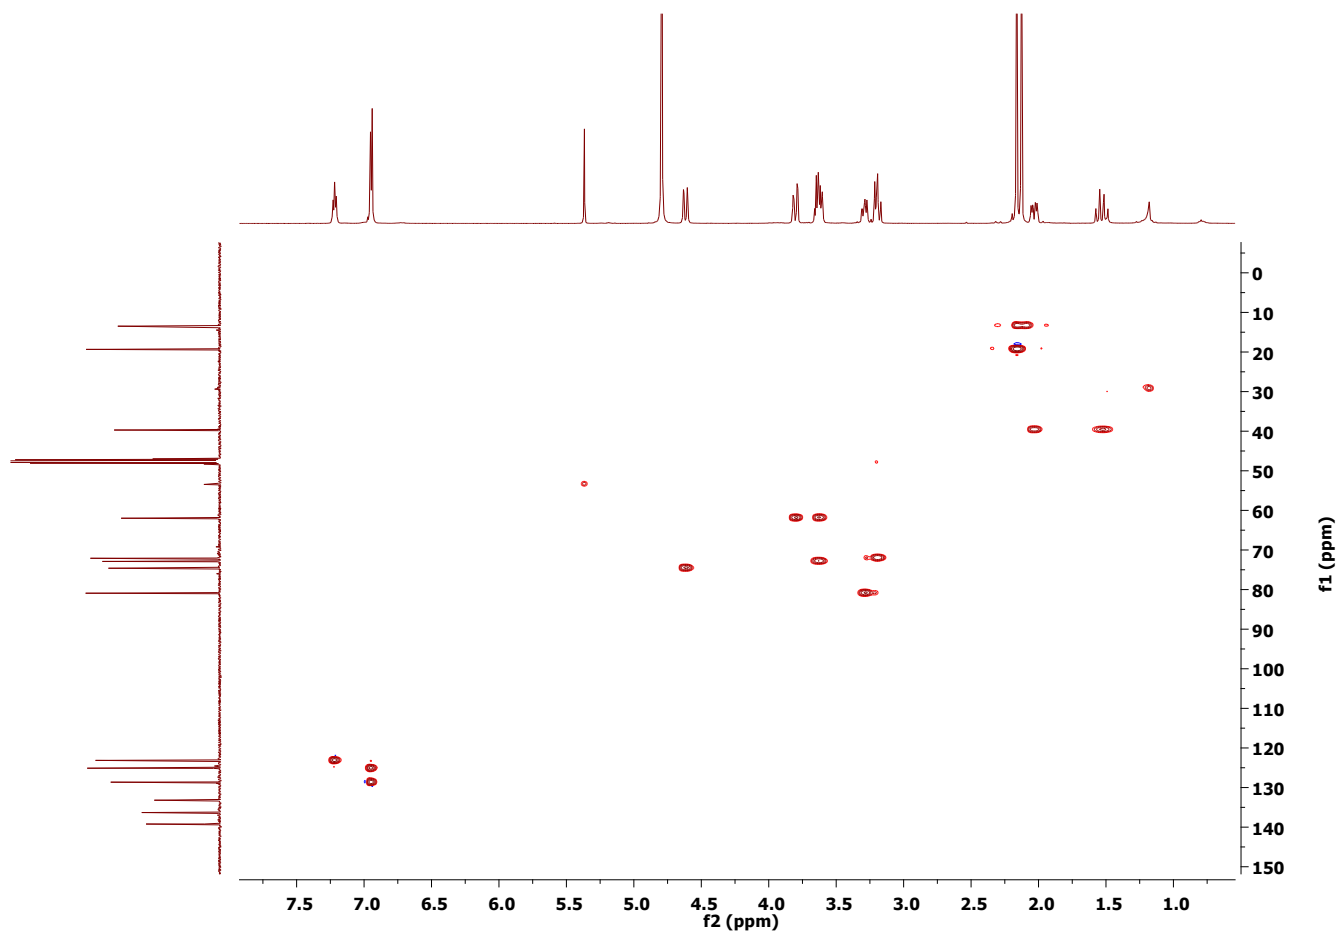



HMBC of compound 7

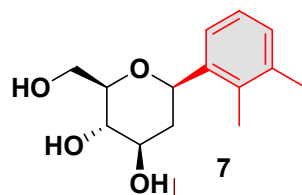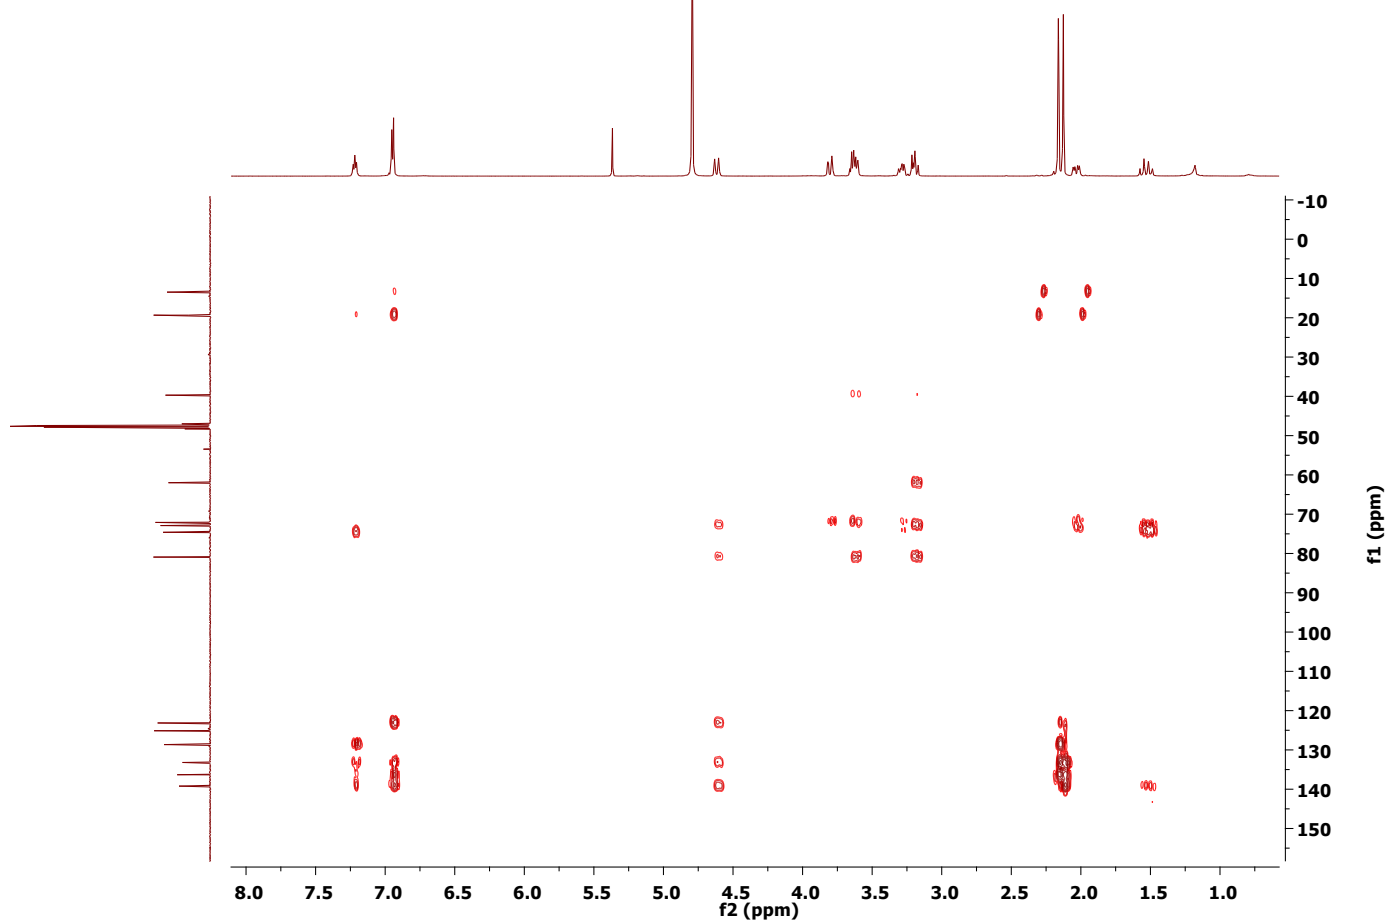

$^1\text{H}$  NMR (400 MHz) of **8** in  $\text{CDCl}_3$

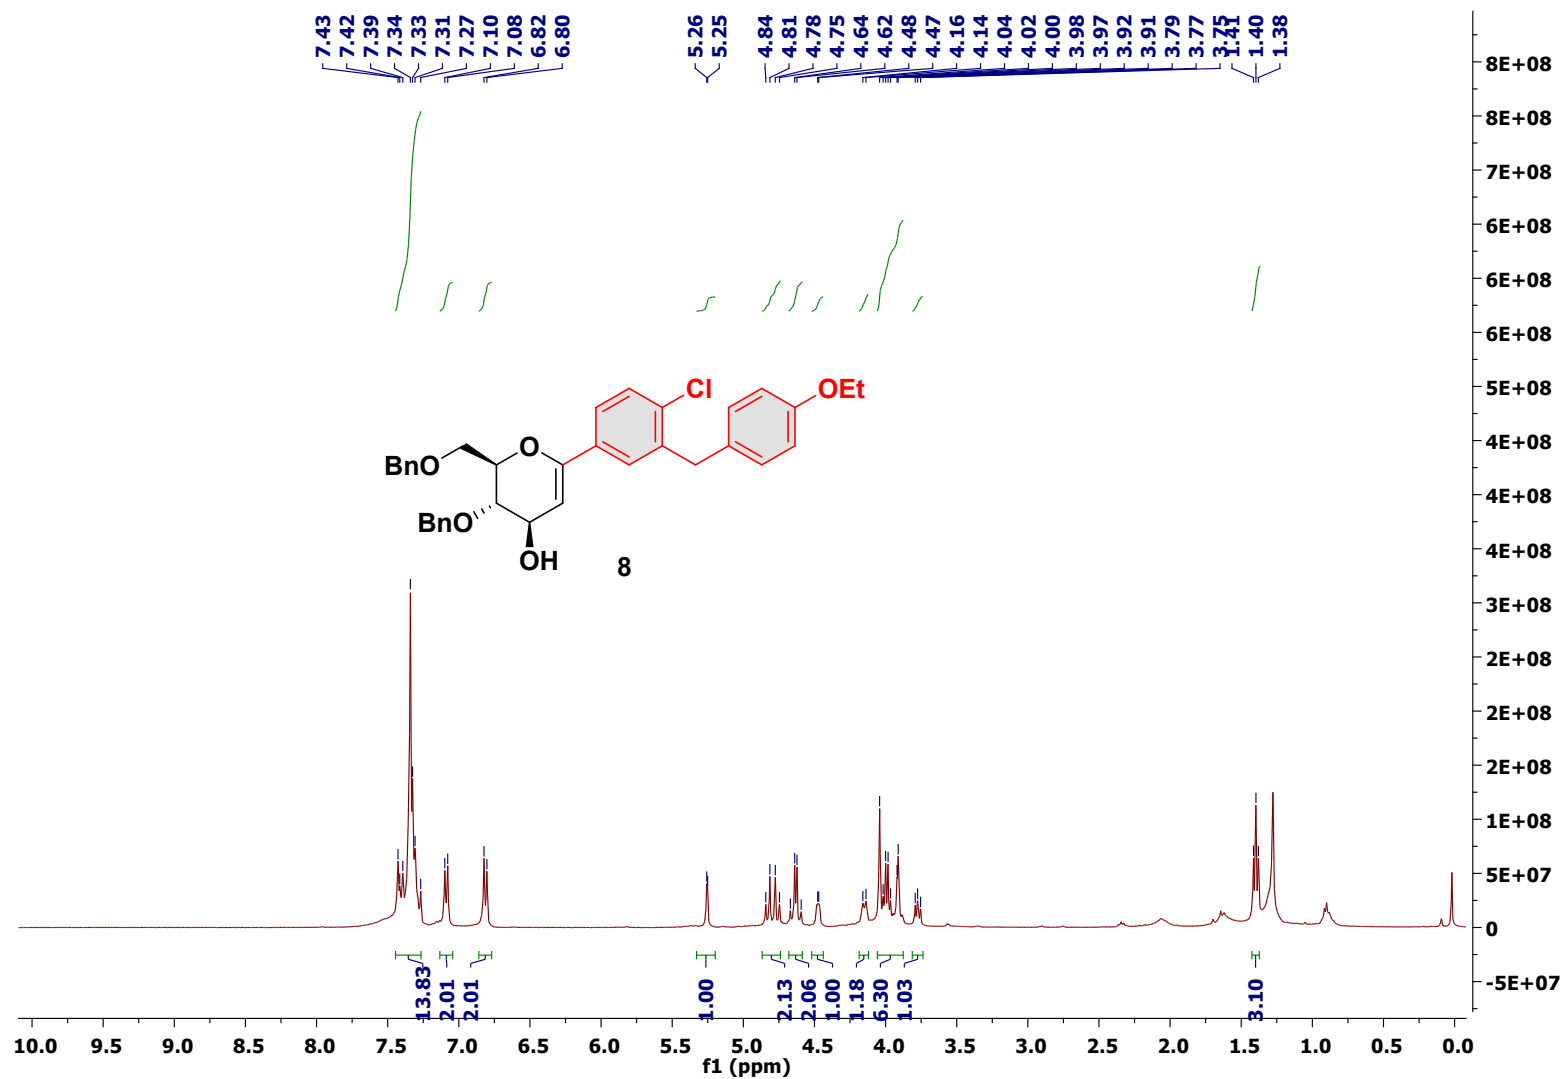

$^{13}\text{C}$  NMR  $\{^1\text{H}\}$  (101 MHz) of **8** in  $\text{CDCl}_3$

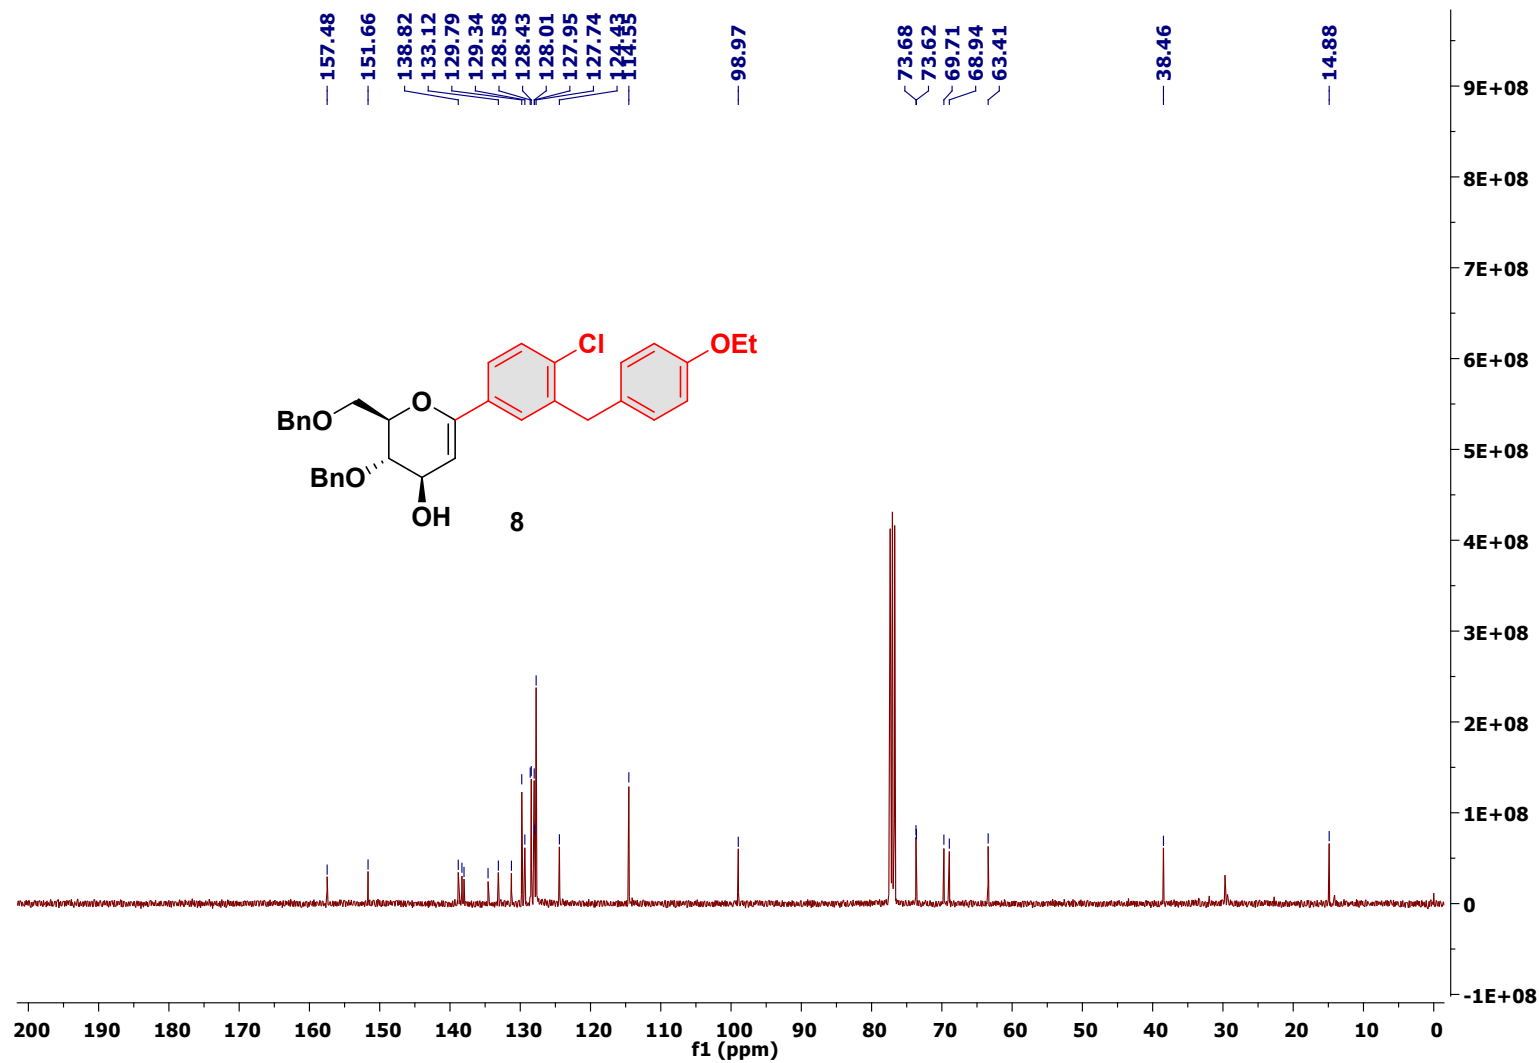

$^1\text{H}$  NMR (400 MHz) of **9** in  $\text{CDCl}_3$

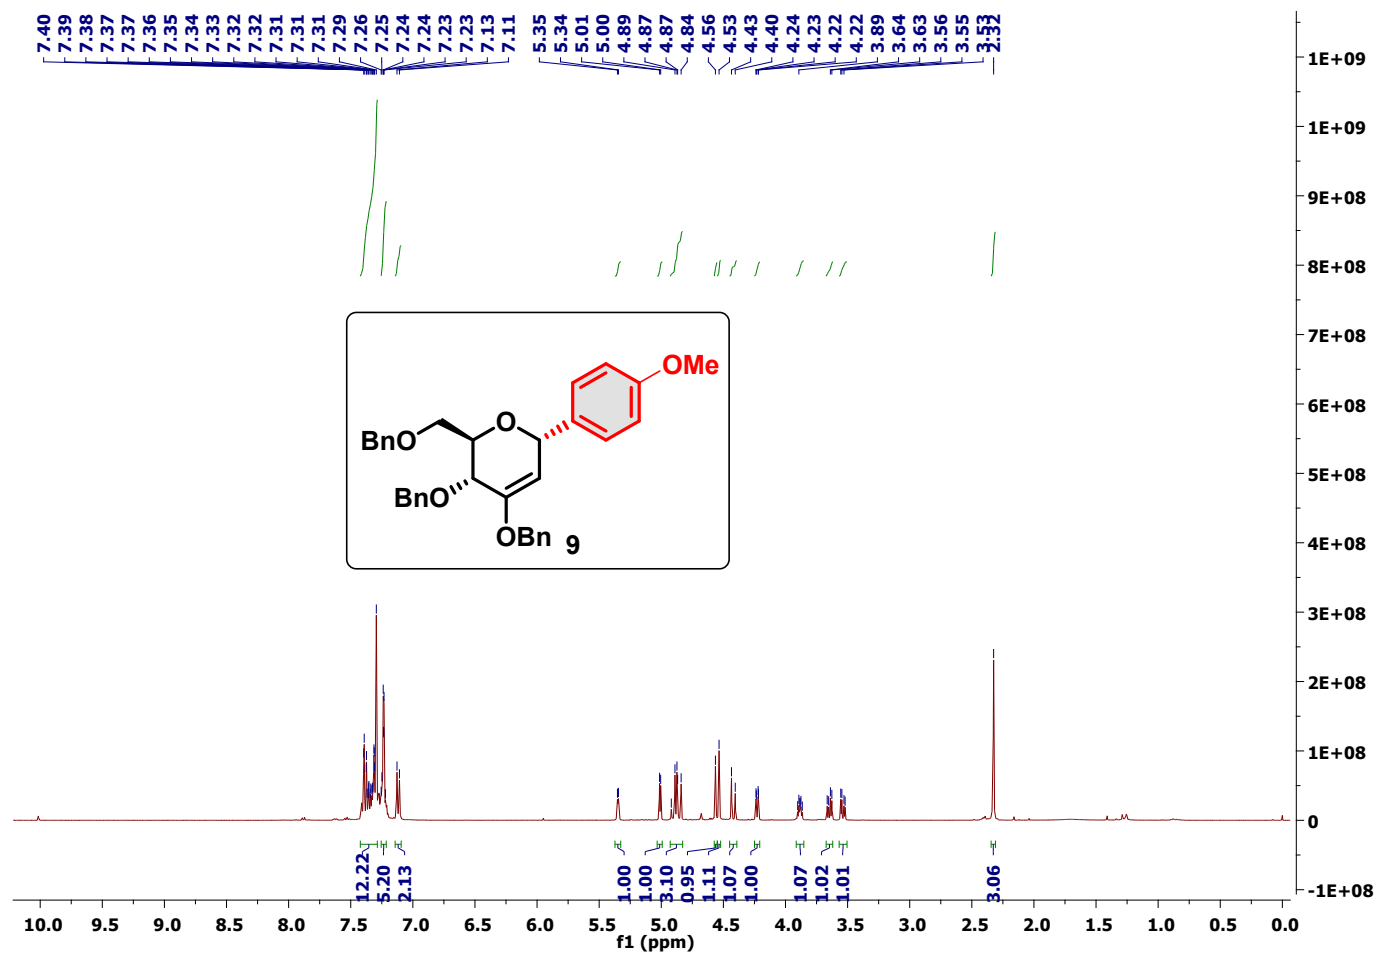

$^{13}\text{C}$  NMR  $\{^1\text{H}\}$  (101 MHz) of **9** in  $\text{CDCl}_3$

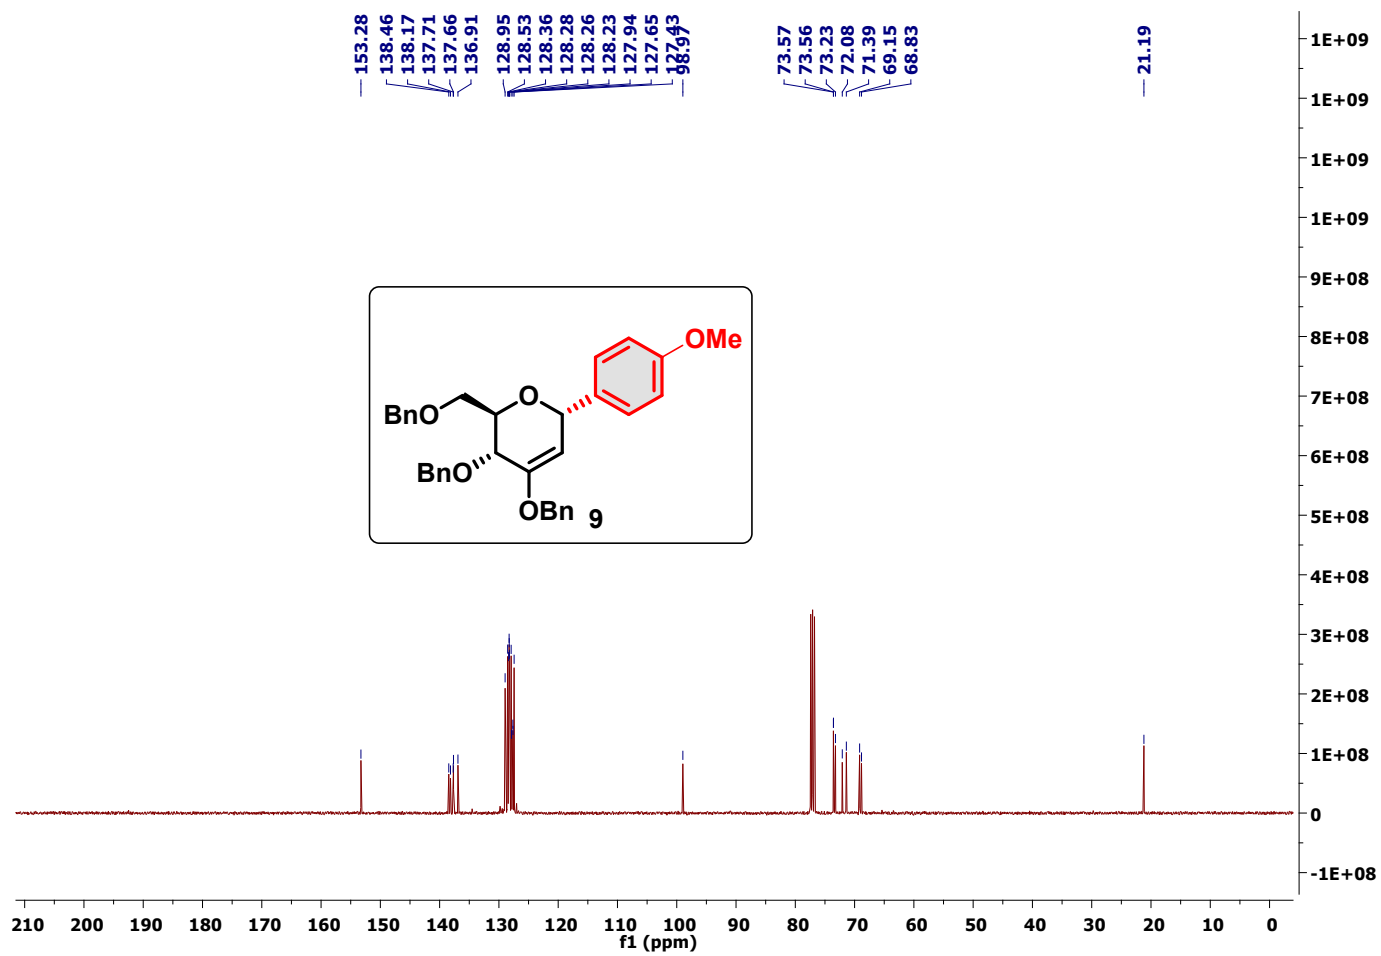

Supplement: d4ob01172d1.pdf [file d4ob01172d1.pdf]
